# Supplementary material
Source: PubMed Central journal article supplement (PMC3117943)
Supplement: NIHMS279131-supplement-1_si_001.pdf [file NIHMS279131-supplement-1_si_001.pdf]

**Antibacterial Studies of Cationic Polymers  
with Alternating, Random and Uniform Backbones**

Airong Song,<sup>1</sup> Stephen G. Walker,<sup>2</sup> Kathlyn A. Parker,<sup>1,\*</sup> Nicole, S. Sampson<sup>1,\*</sup>

<sup>1</sup>Department of Chemistry, Stony Brook University, Stony Brook, NY 11794-3400

<sup>2</sup>Department of Oral Biology and Pathology, Stony Brook University, Stony Brook, NY 11794-8700

\*corresponding authors: kathlyn.parker@stonybrook.edu; nicole.sampson@stonybrook.edu

**Table of Contents**

|                                                                                                      |        |
|------------------------------------------------------------------------------------------------------|--------|
| Materials and General Procedures                                                                     | -----5 |
| Preparation of CB-CO <sub>2</sub> C <sub>4</sub> H <sub>8</sub> NHBoc, <b>17b</b>                    | -----5 |
| Preparation of CB-CO <sub>2</sub> C <sub>2</sub> H <sub>4</sub> N=C(NHBoc) <sub>2</sub> , <b>17c</b> | -----5 |
| Preparation of N-propyl 3-cyclohexenecarboxamide, <b>18c</b>                                         | -----6 |
| Preparation of N-octyl 3-cyclohexenecarboxamide, <b>18d</b>                                          | -----6 |
| Preparation of CB-CONHC <sub>4</sub> H <sub>8</sub> Cl, <b>19</b>                                    | -----6 |
| Preparation of (Z)-5-Bromocyclooctene, <b>21</b>                                                     | -----6 |
| Preparation of (Z)-4-Cyclooctenecarboxylic acid, <b>22</b>                                           | -----6 |
| Preparation of (Z)-4-Chlorobutyl 4-cyclooctenecarboxylate, <b>20</b>                                 | -----7 |
| Preparation of <b>Intermediate-1</b> and <b>Acopolymer-1</b>                                         | -----7 |
| Preparation of <b>Intermediate-2</b> and <b>Acopolymer-2</b>                                         | -----7 |
| Preparation of <b>Intermediate-3</b> and <b>Acopolymer-3</b>                                         | -----7 |
| Preparation of <b>Intermediate-4</b> and <b>Acopolymer-4</b>                                         | -----8 |
| Preparation of <b>Intermediate-6</b> and <b>Acopolymer-6</b>                                         | -----8 |
| Preparation of <b>Intermediate-7</b> and <b>Acopolymer-7</b>                                         | -----8 |
| Preparation of <b>Intermediate-8</b> and <b>Rcopolymer-8</b>                                         | -----9 |

|                                                                 |          |
|-----------------------------------------------------------------|----------|
| Preparation of <b>Intermediate-9</b> and <b>Rcopolymer-9</b>    | -----9   |
| Preparation of <b>Intermediate-10</b> and <b>Rcopolymer-10</b>  | -----9   |
| Preparation of <b>Intermediate-11</b> and <b>Homopolymer-11</b> | -----9   |
| Preparation of <b>Intermediate-12</b> and <b>Homopolymer-12</b> | ----- 10 |
| Preparation of <b>Intermediate-13</b> and <b>Homopolymer-13</b> | ----- 10 |
| Preparation of <b>Intermediate-14</b> and <b>Homopolymer-14</b> | ----- 10 |
| Polydispersity Index (PDI) determination-----                   | 10       |
| ClogP calculation                                               | ----- 11 |
| MIC and Hemolysis Assays                                        | ----- 11 |
| Thin-section TEM of Bacteria                                    | ----- 12 |
| Lipid Vesicle Preparation                                       | ----- 12 |
| Dye Leakage Experiments of Lipid Vesicles                       | ----- 12 |
| Potassium Release Assay                                         | ----- 12 |
| Membrane Depolarization Assay-----                              | 13       |
| Table S1                                                        | ----- 14 |
| Table S2                                                        | ----- 15 |
| Table S3                                                        | ----- 16 |
| Table S4                                                        | ----- 17 |
| Table S5                                                        | ----- 18 |
| Table S6                                                        | ----- 19 |
| Table S7                                                        | ----- 20 |
| Table S8                                                        | ----- 21 |
| Figure S1                                                       | ----- 22 |
| Figure S2                                                       | ----- 23 |
| Figure S3                                                       | ----- 24 |
| Figure S4                                                       | ----- 25 |
| Figure S5                                                       | ----- 26 |

|                                                |       |    |
|------------------------------------------------|-------|----|
| Figure S6                                      | ----- | 27 |
| Figure S7                                      | ----- | 28 |
| References                                     | ----- | 29 |
| <sup>1</sup> H-NMR spectrum of <b>17b</b>      | ----- | 30 |
| <sup>13</sup> C-NMR spectrum of <b>17b</b>     | ----- | 31 |
| <sup>1</sup> H-NMR spectrum of <b>17c</b>      | ----- | 32 |
| <sup>13</sup> C-NMR spectrum of <b>17c</b>     | ----- | 33 |
| <sup>1</sup> H-NMR spectrum of <b>18c</b>      | ----- | 34 |
| <sup>13</sup> C-NMR spectrum of <b>18c</b>     | ----- | 35 |
| <sup>1</sup> H-NMR spectrum of <b>18d</b>      | ----- | 36 |
| <sup>13</sup> C-NMR spectrum of <b>18d</b>     | ----- | 37 |
| <sup>1</sup> H-NMR spectrum of <b>19</b>       | ----- | 38 |
| <sup>13</sup> C-NMR spectrum of <b>19</b>      | ----- | 39 |
| <sup>1</sup> H-NMR spectrum of <b>21</b>       | ----- | 40 |
| <sup>1</sup> H-NMR spectrum of <b>22</b>       | ----- | 41 |
| <sup>13</sup> C-NMR spectrum of <b>22</b>      | ----- | 42 |
| <sup>1</sup> H-NMR spectrum of <b>20</b>       | ----- | 43 |
| <sup>13</sup> C-NMR spectrum of <b>20</b>      | ----- | 44 |
| <sup>1</sup> H-NMR spectrum of Intermediate-1  | ----- | 45 |
| <sup>13</sup> C-NMR spectrum of Intermediate-1 | ----- | 46 |
| <sup>1</sup> H-NMR spectrum of Intermediate-2  | ----- | 47 |
| <sup>1</sup> H-NMR spectrum of Intermediate-3  | ----- | 48 |
| <sup>1</sup> H-NMR spectrum of Intermediate-4  | ----- | 49 |
| <sup>1</sup> H-NMR spectrum of Intermediate-6  | ----- | 50 |
| <sup>1</sup> H-NMR spectrum of Intermediate-7  | ----- | 51 |
| <sup>1</sup> H-NMR spectrum of Intermediate-8  | ----- | 52 |
| <sup>1</sup> H-NMR spectrum of Intermediate-9  | ----- | 53 |

|                                                                      |    |
|----------------------------------------------------------------------|----|
| <sup>1</sup> H-NMR spectrum of Intermediate-10                       | 54 |
| <sup>1</sup> H- <sup>1</sup> H gCOSY NMR spectrum of Intermediate-10 | 55 |
| <sup>13</sup> C-NMR spectrum of Intermediate-10                      | 56 |
| <sup>1</sup> H-NMR spectrum of Intermediate-11                       | 57 |
| <sup>1</sup> H-NMR spectrum of Intermediate-12                       | 58 |
| <sup>13</sup> C-NMR spectrum of Intermediate-12                      | 59 |
| <sup>1</sup> H-NMR spectrum of Intermediate-13                       | 60 |
| <sup>1</sup> H-NMR spectrum of Intermediate-14                       | 61 |
| <sup>13</sup> C-NMR spectrum of Intermediate-14                      | 62 |
| <sup>1</sup> H-NMR spectrum of Acopolymer-1                          | 63 |
| <sup>1</sup> H-NMR spectrum of Acopolymer-2                          | 64 |
| <sup>1</sup> H-NMR spectrum of Acopolymer-3                          | 65 |
| <sup>1</sup> H-NMR spectrum of Acopolymer-4                          | 66 |
| <sup>1</sup> H-NMR spectrum of Acopolymer-6                          | 67 |
| <sup>1</sup> H-NMR spectrum of Acopolymer-7                          | 68 |
| <sup>1</sup> H-NMR spectrum of Rcopolymer-8                          | 69 |
| <sup>1</sup> H-NMR spectrum of Rcopolymer-9                          | 70 |
| <sup>1</sup> H-NMR spectrum of Rcopolymer-10                         | 71 |
| <sup>1</sup> H-NMR spectrum of Homopolymer-11                        | 72 |
| <sup>1</sup> H-NMR spectrum of Homopolymer-12                        | 73 |
| <sup>1</sup> H-NMR spectrum of Homopolymer-13                        | 74 |
| <sup>1</sup> H-NMR spectrum of Homopolymer-14                        | 75 |

**Materials and General Procedures.** Coupling agents used were purchased from Advanced Chem Tech. or PerSeptive Biosystems. Solvents, chemical reagents, cyclohexene **18a**, and catalysts were obtained from Fisher Scientific, Inc. or Sigma-Aldrich.  $(\text{H}_2\text{IMes})(3\text{-Brpyr})_2\text{Cl}_2\text{Ru}=\text{CHPh}$  **15** (**1**), 1-cyclobutenecarboxylic acid, (**2**, **3**) 1-cyclobutenecarboxylic chloride (**4**), ester **17a** (**4**), **Intermediate-5** (**4**), and **Acopolymer-5** (**4**) were prepared according to the literature. MHBC was used for the culture of all bacteria.  $\text{CH}_2\text{Cl}_2$ , benzene,  $\text{Et}_2\text{O}$ , THF and  $\text{CH}_3\text{OH}$  were dried in a GlassContour solvent pushstill system; pentane was used without further purification. All reactions were carried out under an Ar atmosphere in oven-dried glassware unless otherwise specified. Analytical thin layer chromatography (TLC) was performed on precoated silica gel plates (60F254), flash chromatography on silica gel-60 (230–400 mesh) and Combi-Flash chromatography on RediSep normal phase silica columns (Teledyne Isco, silica gel-60, 230–400 mesh). TLC spots were detected by UV light and by staining with phosphomolybdic acid (PMA). The usual workup for ester or amide coupling reactions was three washes of the  $\text{CH}_2\text{Cl}_2$  solution with 5%  $\text{NaHCO}_3$ , followed by three washes with 1 N HCl and drying of the  $\text{CH}_2\text{Cl}_2$  over  $\text{Na}_2\text{SO}_4$ . After evaporation of solvent, the final product was purified by flash silica chromatography or Combi-Flash chromatography. Inova400, Inova500 and Inova600 MHz NMR Instruments were used to perform NMR analysis.  $^1\text{H}$ -NMR spectra are reported as chemical shift in parts per million (multiplicity, coupling constant in Hz, integration) and were acquired in  $\text{CDCl}_3$  unless otherwise noted.  $^1\text{H}$ -NMR data are assumed to be first order. TEM images were acquired on a FEI BioTwinG<sup>2</sup> transmission electron microscope. High-resolution mass spectra were obtained on a Thermo Fisher Scientific LTQ Orbitrap XL ETD. For PDI (Polydispersity Index) determination, a Shimadzu HPLC and UV detector coupled to a Brookhaven Instruments RI detector (BI-DNDC) and a multiangle static light scattering detector (BI-MwA) were used.

**CB-CO<sub>2</sub>C<sub>4</sub>H<sub>8</sub>NHBoc, 17b.** *t*-Butyl 4-hydroxybutylcarbamate (1.22 mmol, 232 mg) and pyridine (2.04 mmol, 164  $\mu\text{L}$ ) were dissolved in 1.0 mL dry  $\text{CH}_2\text{Cl}_2$ , and the solution was stirred at 0 °C for 45 min before being added to a vial containing 1-cyclobutenecarboxylic chloride (1.02 mmol). The reaction mixture was stirred for 16 h at rt. The  $\text{CH}_2\text{Cl}_2$  solution was concentrated by rotary evaporation, and then purified by flash column chromatography (acetone: $\text{CH}_2\text{Cl}_2$ /5:95) to yield **17b** as a colorless oil (170 mg, 62%).  $^1\text{H}$  NMR (400 MHz)  $\delta$  8.56 (s, 2H), 6.78 (s, 1H), 4.20 (t,  $J$ = 8Hz, 2H), 3.67 (m, 2H), 2.69 (m, 2H), 2.42 (m, 2H), 1.44 (m, 2H).  $^{13}\text{C}$  NMR (100 MHz)  $\delta$  163.6, 161.9, 153.3, 147.5, 138.4, 83.4, 83.3, 79.5, 79.5, 77.5, 77.2, 76.9, 53.6, 39.8, 39.5, 37.3, 31.0, 29.2, 28.4. HRMS (ESI) calcd for  $\text{C}_{14}\text{H}_{24}\text{NO}_4$   $[\text{M}+\text{H}]^+$  270.1705; found 270.1693.

**CB-CO<sub>2</sub>C<sub>2</sub>H<sub>4</sub>N=C(NHBoc)<sub>2</sub>, 17c.**  $\text{HOC}_2\text{H}_4\text{N}=\text{C}(\text{NHBoc})_2$  (0.51 mmol, 155 mg) and pyridine (2.04 mmol, 164  $\mu\text{L}$ ) were dissolved in 1.0 mL dry  $\text{CH}_2\text{Cl}_2$ , and the solution was stirred at 0 °C for 45 min before being added to a vial containing 1-cyclobutenecarboxylic chloride (1.02 mmol). The reaction mixture was stirred for 16 h at rt. The  $\text{CH}_2\text{Cl}_2$  solution was concentrated by rotary evaporation, and then purified by flash column chromatography (acetone: $\text{CH}_2\text{Cl}_2$ /1:9) to yield **17c** as a colorless oil (90 mg, 46%).  $^1\text{H}$  NMR (600 MHz)  $\delta$  6.76 (s, 1H), 4.13 (t,  $J$ = 6 Hz, 2H), 3.15 (m, 2H), 2.71 (m, 2H), 2.46 (m, 2H), 1.68 (m, 2H), 1.55 (m, 2H), 1.43 (s, 9H).  $^{13}\text{C}$  NMR (100 MHz)  $\delta$

162.3, 156.2, 146.7, 138.9, 64.2, 53.7, 40.5, 31.1, 29.3, 28.6, 27.3, 26.2. HRMS (ESI) calcd for  $C_{18}H_{30}N_3O_6$   $[M+H]^+$  384.2129; found 384.2128.

**N-propyl 3-cyclohexenecarboxamide, 18c.** 3-Cyclohexenecarboxylic acid (0.71 mmol, 90 mg),  $NH_2CH_2CH_2CH_3$  (0.86 mmol, 70  $\mu$ L) and EDC·HCl (0.86 mmol, 164 mg) were dissolved in  $CH_2Cl_2$  (3 mL). DIEA (1.43 mmol, 252  $\mu$ L) was added at 0 °C, and the reaction was stirred for 16 h at rt. The usual workup and chromatography (acetone/ $CH_2Cl_2$ /10:90) yielded N-propylcyclohex-3-enecarboxamide **18c** as a white powder (65 mg, 55%).  $^1H$  NMR (400 MHz)  $\delta$  5.64 (m, 3H), 3.17 (dd, J= 8 Hz, J=8 Hz, 2H), 2.30-1.93 (m, 5H), 1.87-1.81 (m, 1H), 1.72-1.59 (m, 1H), 1.43 (m, 2H), 0.87 (t, J= 8 Hz, 3H).  $^{13}C$  NMR (100 MHz)  $\delta$  175.9, 126.9, 125.6, 41.5, 41.2, 28.4, 26.0, 24.8, 23.1, 11.5. HRMS (ESI) calcd for  $C_{10}H_{18}NO$   $[M+H]^+$  168.1383; found 168.1379.

**N-octyl 3-cyclohexenecarboxamide, 18d.** 3-Cyclohexenecarboxylic acid (1.11 mmol, 140 mg), octylamine (1.33 mmol, 220  $\mu$ L) and EDC·HCl (1.33 mmol, 255 mg) were dissolved in  $CH_2Cl_2$  (3mL). DIEA (2.22 mmol, 393  $\mu$ L) was added at 0 °C, and the reaction was stirred for 16 h at rt. The usual workup and chromatography (acetone/ $CH_2Cl_2$ /10:90) yielded N-octylcyclohex-3-enecarboxamide **18d** as a white powder (215 mg, 82%).  $^1H$  NMR (400 MHz)  $\delta$  5.77 (s, 1H), 5.63 (s, 2H), 3.18 (dd, J= 8 Hz, J=8 Hz, 2H), 2.33-2.00 (m, 5H), 1.86-1.82 (s, 1H), 1.70-1.60 (m, 1H), 1.43 (m, 2H), 1.22 (m, 10H), 0.82 (t, J= 8 Hz, 3H).  $^{13}C$  NMR (100 MHz)  $\delta$  175.9, 126.9, 125.6, 41.46, 39.6, 31.9, 29.8, 29.4, 29.3, 28.3, 27.1, 25.9, 24.8, 22.8, 14.2. HRMS (ESI) calcd for  $C_{15}H_{28}NO$   $[M+H]^+$  238.2165; found 238.2160.

**CB-CONHC<sub>4</sub>H<sub>9</sub>Cl, 19.** The chloramine hydrochloride was prepared according to Sommen et al. (5).  $H_2NCH_2CH_2CH_2CH_2OH$  (2.24 mmol, 200 mg) was dissolved in benzene (2 mL).  $SOCl_2$  (500  $\mu$ L) was added slowly to the solution and a white precipitate formed. The mixture was stirred at rt for 2 h. The precipitate was filtered, washed with benzene, and dried under vacuum to provide  $H_2NCH_2CH_2CH_2CH_2Cl\cdot HCl$  (320 mg, 99%) which was combined with 1-cyclobutenecarboxylic acid (1.12 mmol, 110 mg) and EDC·HCl (1.35 mmol, 258 mg) and dissolved in  $CH_2Cl_2$  (10 mL). Pyridine (4.49 mmol, 362  $\mu$ L) was added at 0 °C, and the reaction was stirred for 16 h at rt. The workup (washed with 1N HCl twice, and then washed with brine twice) and chromatography (acetone: $CH_2Cl_2$ /10:90) yielded **19** as a viscous oil (98 mg, 47%).  $^1H$  NMR (400 MHz)  $\delta$  6.56 (s, 1H), 5.79 (s, 1H), 3.52 (t, J= 8 Hz, 2H), 3.28 (m, 2H), 2.63 (m, 2H), 2.41 (m, 2H), 1.75 (m, 2H), 1.65 (m, 2H).  $^{13}C$  NMR (100 MHz)  $\delta$  163.0, 141.6, 140.5, 44.8, 38.4, 30.0, 28.6, 27.2, 26.3. HRMS (ESI) calcd for  $C_9H_{15}ClNO$   $[M+H]^+$  188.0837; found 188.0835.

**(Z)-5-Bromocyclooctene, 21.** Cyclooctene **21** was prepared according to the literature (6).  $^1H$  NMR (500 MHz)  $\delta$  5.65 (m, 2H), 4.33 (m, 1H), 2.47-1.54 (m, 11H).

**(Z)-4-Cyclooctenecarboxylic acid, 22.** (Z)-4-Cyclooctenecarboxylic acid **22** was prepared according to the literature (7).  $^1H$  NMR (500 MHz)  $\delta$  11.67 (s, 1H), 5.69 (m, 2H), 2.51-1.41 (m, 11H).  $^{13}C$  NMR (125 MHz)  $\delta$  184.6, 130.8, 129.5, 43.4, 31.6, 29.4, 27.9, 26.2, 24.2.

**(Z)-4-Chlorobutyl 4-cyclooctenecarboxylate, 20.** 4-Cyclooctenecarboxylic acid (1.04 mmol, 160 mg) was dissolved in 6 mL dry CH<sub>2</sub>Cl<sub>2</sub>. The solution was cooled to 0 °C and oxalyl dichloride (4.16 mmol, 356 μL) was added. The temperature of the solution was raised to rt, and the mixture was allowed to react for 1 h. The solvent was evaporated to generate 4-cyclooctenecarboxylic chloride as a viscous oil. 4-Chlorobutanol (1.04 mmol, 113 mg) and triethylamine (2.07 mmol, 287 μL) were dissolved in 6 mL dry CH<sub>2</sub>Cl<sub>2</sub>, and the solution was stirred at 0 °C for 45 min before being added to a vial containing 4-cyclooctenecarboxylic chloride. The reaction mixture was stirred for 16 h at rt. The CH<sub>2</sub>Cl<sub>2</sub> solution was concentrated by rotary evaporation, and then purified by flash column chromatography (CH<sub>2</sub>Cl<sub>2</sub>) to yield **20** as a colorless oil (200 mg, 79%). <sup>1</sup>H NMR (500 MHz) δ 5.64 (m, 2H), 4.03 (m, 2H), 3.51 (t, J = 15 Hz, 2H), 2.43-1.36 (m, 15H). <sup>13</sup>C NMR (125 MHz) δ 177.5, 130.4, 129.6, 63.6, 44.6, 43.5, 31.6, 29.4, 27.8, 25.9, 24.0. HRMS (ESI) calcd for C<sub>13</sub>H<sub>22</sub>ClO<sub>2</sub> [M+H]<sup>+</sup> 245.1303; found 245.1298.

**Intermediate-1 and Acopolymer-1.** Cyclobutene **17a** (0.15 mmol), cyclohexene **18a** (0.30 mmol) and catalyst **15** (0.006 mmol) were allowed to react for 5 h at rt to reach 90% completion. The solvent was evaporated, and the residue was purified by flash column chromatography (acetone:CH<sub>2</sub>Cl<sub>2</sub>/5:95) to provide **Intermediate-1** (21 mg, 51%). <sup>1</sup>H NMR (500 MHz, CD<sub>2</sub>Cl<sub>2</sub>) δ 7.40-7.21 (m, 5H), 6.78 (b, 25H), 6.43 (m, 1H), 6.27 (m, 1H), 5.85(m, 1H), 5.44 (b, 42H), 4.17 (b, 50H), 3.63 (b, 50H), 2.44-2.02 (m, 188H), 1.88 (m, 100H), 1.52-1.44 (b, 88H). <sup>13</sup>C NMR (125 MHz) δ 168.0, 143.3, 131.9, 131.0, 130.9, 130.7, 130.5, 130.4, 130.1, 129.9, 129.7, 129.3, 128.7, 128.5, 125.5, 63.7, 44.8, 32.6, 32.4, 31.9, 29.6, 29.4, 29.2, 29.1, 29.0, 28.8-27.3, 26.4. **Intermediate-1** and aqueous trimethylamine (45% wt, 1 mL) were mixed in acetonitrile (2 mL). The solution was heated to 70 °C for 4 h. The solvent was evaporated to provide **Acopolymer-1** as a brown powder. <sup>1</sup>H NMR (600 MHz, D<sub>2</sub>O) δ 7.50-7.27 (m, 5H), 6.91 (b, 25H), 6.39 (b, 1H), 6.28 (b, 1H), 5.89 (b, 1H), 5.45 (b, 44H), 4.25 (b, 50H), 3.44 (b, 50H), 3.19 (s, 225H), 2.40-2.04 (m, 188H), 1.94 (m, 50H), 1.84 (m, 50H), 1.47 (m, 88H).

**Intermediate-2 and Acopolymer-2.** Cyclobutene **17a** (0.15 mmol), cyclohexene **18b** (0.30 mmol) and catalyst **15** (0.006 mmol) were allowed to react for 3 h at 50 °C to reach 94% completion. The solvent was evaporated, and the residue was purified by flash column chromatography (acetone:CH<sub>2</sub>Cl<sub>2</sub>/10:90) to provide **Intermediate-2** (35 mg, 81%). <sup>1</sup>H NMR (600 MHz, CD<sub>2</sub>Cl<sub>2</sub>) δ 7.38-7.21 (m, 5H), 6.75 (b, 25H), 6.39 (b, 1H), 6.22 (b, 1H), 5.81 (b, 1H), 5.42 (b, 34H), 4.14 (b, 50H), 3.61 (b, 50H), 2.36-2.01 (m, 172H), 1.84 (m, 100H), 1.57-1.36 (m, 108H). **Intermediate-2** and aqueous trimethylamine (45% wt, 1 mL) were mixed in acetonitrile (2 mL). The solution was heated to 70 °C for 4 h. The solvent was evaporated to provide **Acopolymer-2** as a brown powder. <sup>1</sup>H NMR (600 MHz, D<sub>2</sub>O) δ 7.36-7.15 (m, 5H), 6.75 (b, 17H), 5.27 (b, 13H), 4.08 (b, 34H), 3.26 (b, 34H), 3.02 (b, 153H), 2.40-1.97 (m, 124H), 1.76-1.66 (b, 68H), 1.37-1.08 (m, 84H).

**Intermediate-3 and Acopolymer-3.** Cyclobutene **17a** (0.15 mmol), cyclohexene **18c** (0.30 mmol) and catalyst **15** (0.006 mmol) were mixed in CDCl<sub>3</sub> and allowed to react for 3 h at 50 °C to reach 92% completion. The solvent was evaporated, and the residue was purified by flash column chromatography (acetone:CH<sub>2</sub>Cl<sub>2</sub>/10:90) to provide **Intermediate-3** (28 mg, 53%). <sup>1</sup>H NMR (600 MHz, CD<sub>2</sub>Cl<sub>2</sub>) δ 7.43-7.21 (m,

5H), 6.73 (s, 31H), 6.36 (b, 1H), 6.21 (b, 1H), 5.83 (b, 1H), 5.56-5.40 (b, 44H), 4.15 (b, 62H), 3.60 (b, 62H), 3.17 (b, 46H), 2.44-2.08 (m, 216H), 1.85-1.82 (m, 124H), 1.61-1.51 (m, 115H), 0.92 (m, 69H). **Intermediate-3** and aqueous trimethylamine (45% wt, 1 mL) were mixed in acetonitrile (2 mL). The solution was heated to 70 °C for 4 h. The solvent was evaporated, the residue dissolve in water and washed with Et<sub>2</sub>O to provide **Acopolymer-3** as a brown powder. <sup>1</sup>H NMR (600 MHz, D<sub>2</sub>O) δ 7.53-7.31 (m, 5H), 6.86 (m, 30H), 5.47 (b, 48H), 4.28 (b, 60H), 3.41 (b, 60H), 3.17 (b, 270H), 2.57-2.18 (m, 220H), 1.93-1.56 (m, 195H), 0.94 (b, 75H).

**Intermediate-4 and Acopolymer-4.** Cyclobutene **17a** (0.15 mmol), cyclohexene **18d** (0.30 mmol) and catalyst **15** (0.006 mmol) were mixed in CDCl<sub>3</sub> and allowed to react for 5 h at 50 °C to reach 96% completion. The solvent was evaporated, and the residue was purified by flash column chromatography (acetone:CH<sub>2</sub>Cl<sub>2</sub>/10:90) to provide **Intermediate-4** (39 mg, 61%). <sup>1</sup>H NMR (500 MHz, CD<sub>2</sub>Cl<sub>2</sub>) δ 7.41-7.23 (m, 5H), 6.76 (b, 22H), 6.42 (b, 1H), 6.23 (b, 1H), 5.94 (b, 1H), 5.41 (b, 38H), 4.17 (b, 44H), 3.61 (b, 44H), 3.22 (40H), 2.53-2.11 (m, 168H), 1.86 (m, 88H), 1.62-1.50 (m, 60H), 1.32 (m, 240H), 0.91 (m, 60H). **Intermediate-4** and aqueous trimethylamine (45% wt, 1 mL) were mixed in acetonitrile (2 mL). The solution was heated to 70 °C for 4 h. The solvent was evaporated, diluted with water and washed by Et<sub>2</sub>O to provide **Acopolymer-4** as a brown powder. <sup>1</sup>H-NMR (600 MHz, D<sub>2</sub>O) δ 7.46-7.30 (m, 5H), 6.88 (b, 25H), 5.48 (b, 48H), 4.26 (b, 50H), 3.42 (b, 50H), 3.18 (b, 225H), 2.40-1.31 (m, 650H).

**Intermediate-6 and Acopolymer-6.** Cyclobutene **17b** (0.15 mmol), cyclohexene **18a** (0.30 mmol) and catalyst **15** (0.006 mmol) were mixed in CDCl<sub>3</sub> and allowed to react for 80 min at 50 °C to reach 97% completion. The solvent was evaporated, and the residue was purified by flash column chromatography (acetone:CH<sub>2</sub>Cl<sub>2</sub>/10:90) to provide **Intermediate-6** (26 mg, 49%). <sup>1</sup>H NMR (600 MHz, CD<sub>2</sub>Cl<sub>2</sub>) δ 7.40-7.20 (m, 5H), 6.75 (b, 25H), 6.36 (m, 1H), 6.22 (b, 1H), 5.79 (b, 1H), 5.39 (b, 38H), 4.67 (b, 25H), 4.12 (b, 50H), 3.13 (b, 50H), 2.44-2.02 (m, 180H), 1.69-1.28 (m, 405H). **Intermediate-6** and trifluoro acetic acid (TFA) (2 mL) were mixed in CH<sub>2</sub>Cl<sub>2</sub> (2 mL). The solution was stirred at rt for 2 h. The crude solution was purged with Ar to remove solvent and to provide **Acopolymer-6** as a brown powder. <sup>1</sup>H NMR (600 MHz, D<sub>2</sub>O) δ 7.34-7.06 (m, 5H), 6.70 (b, 18H), 5.24 (b, 22H), 4.04 (m, 36H), 2.94 (b, 36H), 2.34-1.84 (m, 120H), 1.66-1.09 (m, 282H).

**Intermediate-7 and Acopolymer-7.** Cyclobutene **17c** (0.15 mmol), cyclohexene **18a** (0.30 mmol) and catalyst **15** (0.006 mmol) were mixed in CDCl<sub>3</sub> and allowed to react for 80 min at 50 °C to reach 97% completion. The solvent was evaporated, and the residue was purified by flash column chromatography (acetone:CH<sub>2</sub>Cl<sub>2</sub>/10:90) to provide **Intermediate-7** (51 mg, 73%). <sup>1</sup>H-NMR (500 MHz, CD<sub>2</sub>Cl<sub>2</sub>) δ 8.59 (b, 50H), 7.56-7.21 (m, 5H), 6.84 (b, 25H), 5.41 (b, 48H), 4.28 (m, 50H), 3.68 (m, 50H), 2.49-1.61 (m, 300H), 1.49 (b, 450H). **Intermediate-7** and TFA (2 mL) were mixed in CH<sub>2</sub>Cl<sub>2</sub> (2 mL). The solution was stirred at rt for 2 h. The crude solution was purged with Ar to remove solvent and to provide **Acopolymer-7** as a brown powder. <sup>1</sup>H-NMR (600 MHz, D<sub>2</sub>O) δ 7.38-7.18 (m, 5H), 6.85 (b, 25H), 5.35 (b, 48H), 4.27 (b, 50H), 3.55 (b, 50H), 2.35-2.00 (m, 200H), 1.38 (m, 100H).



**Intermediate-8 and Rcopolymer-8.** Cyclobutene **19** (0.048 mmol), cyclooctene (0.048 mmol) and catalyst **15** (0.012 mmol) were allowed to react for 1 h at rt to reach > 99% completion. The solvent was evaporated to remove solvent, and was purified by flash column chromatography (acetone:CH<sub>2</sub>Cl<sub>2</sub>/5:95) to provide **Intermediate-8** (10 mg, 66%). <sup>1</sup>H NMR (500 MHz, acetone-D<sub>6</sub>) δ 7.38-7.18 (m, 5H), 6.30-6.09 (m, 4H), 5.42 (b, 10H), 3.62 (b, 8H), 3.32 (b, 8H), 2.54-1.66 (m, 52H), 1.33 (m, 40H). **Intermediate-8** and aqueous trimethylamine (45% wt, 1 mL) were mixed in acetonitrile (2 mL). The solution was heated to 70 °C for 4 h. The solvent was evaporated to provide **Rcopolymer-8** as a brown powder. <sup>1</sup>H NMR (600 MHz, D<sub>2</sub>O) δ 7.35-6.96 (m, 11H), 6.29-6.09 (m, 6H), 5.24 (b, 16H), 3.25-3.16 (m, 24H), 3.00 (b, 54H), 2.36-1.45 (m, 84H), 1.19 (b, 72H).

**Intermediate-9 and Rcopolymer-9.** Cyclobutene **19** (0.064 mmol), cyclooctene (0.064 mmol) and catalyst **15** (0.008 mmol) were allowed to react for 1 h at rt to reach > 99% completion. The solvent was evaporated, and the residue was purified by flash column chromatography (acetone:CH<sub>2</sub>Cl<sub>2</sub>/5:95) to provide **Intermediate-9** (14 mg, 74%). <sup>1</sup>H NMR (500 MHz, CD<sub>2</sub>Cl<sub>2</sub>) δ 7.37-7.19 (m, 5H), 6.12 (b, 11H), 5.85 (b, 11H), 5.42 (b, 28H), 3.60 (b, 22H), 3.31 (b, 22H), 2.41-1.70 (m, 148H), 1.35 (b, 120H). **Intermediate-9** and aqueous trimethylamine (45% wt, 1 mL) were mixed in acetonitrile (2 mL). The solution was heated to 70 °C for 4 h. The solvent was evaporated to provide **Rcopolymer-9** as a brown powder. <sup>1</sup>H NMR (600 MHz, D<sub>2</sub>O) δ 7.28-6.98 (m, 5H), 6.21 (b, 9H), 5.25 (b, 24H), 3.24 (m, 36H), 3.00 (b, 81H), 2.33-1.20 (m, 228H).

**Intermediate-10 and Rcopolymer-10.** Cyclobutene **19** (0.20 mmol), cyclooctene (0.20 mmol) and catalyst **15** (0.008 mmol) were allowed to react for 1 h at rt to reach > 99% completion. The solvent was evaporated, and the residue was purified by flash column chromatography (acetone:CH<sub>2</sub>Cl<sub>2</sub>/5:95) to provide **Intermediate-10** (40 mg, 68%). <sup>1</sup>H NMR (500 MHz, CD<sub>2</sub>Cl<sub>2</sub>) δ 7.39-7.22 (m, 5H), 6.13 (b, 25H), 5.42 (b, 62H), 3.61 (b, 50H), 3.32 (b, 50H), 2.44-1.71 (m, 328H), 1.35 (b, 256H). <sup>13</sup>C NMR (125 MHz) δ 170.1, 136.6, 135.4, 131.6, 130.5, 130.3, 129.2, 126.1, 44.8, 39.0, 32.8, 32.2, 30.1, 29.2, 27.3. **Intermediate-10** and aqueous trimethylamine (45% wt, 1 mL) were mixed in acetonitrile (2 mL). The solution was heated to 70 °C for 4 h. The solvent was evaporated to provide **Rcopolymer-10** as a brown powder. <sup>1</sup>H NMR (600 MHz, D<sub>2</sub>O) δ 7.20-7.01 (m, 5H), 6.23 (b, 25H), 5.28 (b, 60H), 3.28 (m, 100H), 3.02 (b, 225H), 2.43-1.50 (m, 324H) 1.21 (b, 248H).

**Intermediate-11 and Homopolymer-11.** Cyclobutene **19** (0.048 mmol) and catalyst **15** (0.012 mmol) were allowed to react for 4 h to reach 93% completion before the addition of ethylvinyl ether (300 μL). After 30 min, the solvent was evaporated and the residue was purified by silica column chromatography with 2% MeOH/ CH<sub>2</sub>Cl<sub>2</sub> to afford the product **Intermediate-11** (7.7 mg, 75% yield). <sup>1</sup>H-NMR (500 MHz, CD<sub>2</sub>Cl<sub>2</sub>) δ 7.43-7.04 (m, 9H), 6.35 (b, 4H), 3.59 (b, 8H), 3.28 (b, 8H), 2.39-1.51 (m, 32H). **Intermediate-11** and aqueous trimethylamine (45% wt, 1 mL) were mixed in acetonitrile (2 mL). The solution was heated to 70 °C for 4 h. The solvent was evaporated to provide **Homopolymer-11** as a brown powder. <sup>1</sup>H NMR (600 MHz, D<sub>2</sub>O) δ 7.51-7.19 (m, 5H), 6.17 (b, 4H), 3.42 (b, 8H), 3.31 (b, 8H), 3.18 (b, 36H), 2.42-2.26 (m, 16H), 1.87-1.63 (m, 16H).

**Intermediate-12 and Homopolymer-12.** Cyclobutene **19** (0.096 mmol) and catalyst **15** (0.012 mmol) were allowed to react for 4 h to reach 92% completion before the addition of ethylvinyl ether (300  $\mu$ L). After 30 min, the solvent was evaporated and the residue was purified by silica column chromatography with 2% MeOH/ CH<sub>2</sub>Cl<sub>2</sub> to afford the product **Intermediate-12** (14 mg, 74% yield). <sup>1</sup>H-NMR (600 MHz, CD<sub>2</sub>Cl<sub>2</sub>)  $\delta$  7.42-6.98 (m, 13H), 6.18 (b, 8H), 3.58 (b, 16H) 3.25 (b, 16H), 2.38-1.65 (m, 128H). <sup>13</sup>C-NMR (125 MHz)  $\delta$  170.8, 136.1, 134.7, 134.4, 130.3, 129.0, 128.8, 128.3, 44.9, 39.4, 30.1, 27.9, 27.2, 26.8. **Intermediate-12** and aqueous trimethylamine (45% wt, 1 mL) were mixed in acetonitrile (2 mL). The solution was heated to 70 °C for 4 h. The solvent was evaporated to provide **Homopolymer-12** as a brown powder. <sup>1</sup>H NMR (600 MHz, D<sub>2</sub>O)  $\delta$  7.51-7.20 (m, 5H), 6.18 (b, 8H), 3.42 (b, 16H), 3.31 (b, 16H), 3.19 (b, 72H), 2.43-2.18 (m, 32H), 1.87-1.64 (m, 32H).

**Intermediate-13 and Homopolymer-13.** Cyclooctene **20** (0.048 mmol) and catalyst **15** (0.012 mmol) were allowed to react for 4 h to reach 93% completion before the addition of ethylvinyl ether (300  $\mu$ L). After 30 min, the solvent was evaporated and the residue was purified by silica column chromatography with 5% acetone/CH<sub>2</sub>Cl<sub>2</sub> to afford the product **Intermediate-13** (9.9 mg, 76% yield). <sup>1</sup>H NMR (500 MHz, CD<sub>2</sub>Cl<sub>2</sub>)  $\delta$  7.36-7.20 (m, 5H), 6.43 (m, 1H), 6.23 (m, 1H), 5.81 (m, 1H), 5.41 (b, 8H), 5.03 (m, 1H), 4.12 (m, 8H), 3.61 (m, 8H), 2.37-1.27 (m, 60H). **Intermediate-13** and aqueous trimethylamine (45% wt, 1 mL) were mixed in acetonitrile (2 mL). The solution was heated to 70 °C for 4 h. The solvent was evaporated to provide **Homopolymer-13** as a brown powder. <sup>1</sup>H NMR (600 MHz, D<sub>2</sub>O)  $\delta$  7.37 (b, 5H), 6.41 (b, 1H), 6.26 (b, 1H), 5.88 (b, 1H), 5.45 (b, 8H), 5.06 (b, 1H), 4.21 (b, 8H), 3.42 (b, 8H), 3.18 (b, 36H), 2.54-1.38 (m, 60H).

**Intermediate-14 and Homopolymer-14.** Cyclobutene **20** (0.096 mmol) and catalyst **15** (0.012 mmol) were allowed to react for 4 h to reach 92% completion before the addition of ethylvinyl ether (300  $\mu$ L). After 30 min, the solvent was evaporated and the residue was purified by silica column chromatography with 2% MeOH/CH<sub>2</sub>Cl<sub>2</sub> to afford the product **Intermediate-14** (19.5 mg, 78% yield). <sup>1</sup>H NMR (500 MHz, CD<sub>2</sub>Cl<sub>2</sub>)  $\delta$  7.36-7.15 (m, 5H), 6.43 (m, 1H), 6.24 (m, 1H), 5.81 (m, 1H), 5.41 (b, 16H), 5.02 (m, 1H), 4.11 (m, 16H), 3.60 (m, 16H), 2.37-1.26 (m, 120H). <sup>13</sup>C NMR (125 MHz)  $\delta$  176.4, 130.8, 130.4, 129.9, 129.4, 129.0, 126.2, 63.7, 45.4, 33.0, 32.2, 30.8, 29.6, 26.7. **Intermediate-14** and aqueous trimethylamine (45% wt, 1 mL) were mixed in acetonitrile (2 mL). The solution was heated to 70 °C for 4 h. The solvent was evaporated to provide **Homopolymer-14** as a brown powder. <sup>1</sup>H NMR (600 MHz, D<sub>2</sub>O)  $\delta$  7.39 (b, 5H), 6.41 (b, 1H), 6.27 (b, 1H), 5.90 (b, 1H), 5.47 (b, 16H), 5.07 (b, 1H), 4.23 (b, 16H), 3.41 (b, 16H), 3.18 (b, 72H), 2.47-1.40 (m, 120H).

**Polydispersity Index (PDI) determination.** Polymers (before flash column chromatography purification) were dissolved in THF (0.5 mg mL<sup>-1</sup>). An aliquot (100  $\mu$ L) of each polymer solution was injected and analyzed by gel permeation chromatography using a Phenogel column (300 x 7.80 mm, 5  $\mu$ m, linear mixed bed, 0-40K MW range). Elution was performed at 0.7 mL/min with THF and detection at 220 nm and 254 nm at 30 °C. Narrowly dispersed polystyrene standards from Aldrich were used as molecular weight calibrants. The number average and weighted average molecular weights were calculated from the chromatogram (WinGPC, Brookhaven Inst.).

**ClogP calculation.** CLogP's of quaternary ammonium polymers were calculated according to Crippen's fragmentation (30) using ChemDraw Ultra 12.0 for the ring-opened AB dyads (copolymers) or A monomers (homopolymer). The ClogP calculations are relative (CLogP<sub>rel</sub>) to **Acopolymer-1** that was arbitrarily set to 0. The quaternary ammonium fragment, which was present in all the polymers, was not included in the calculation. A more positive CLogP is more hydrophobic than **Acopolymer-1** and conversely, a more negative CLogP is less hydrophobic. The standard deviation of the calculation is  $\pm 0.5$ .

**MIC and Hemolysis Assays.** The minimal inhibitory concentration (MIC) for the polymers towards six bacterial species were determined using the broth microdilution method as described by protocol M7-A7 of the Clinical and Laboratory Standards Institute (59). Two-fold serial dilutions of test polymers were made using cation-adjusted Mueller Hinton broth (MHBC) from a concentration of 512  $\mu\text{g}$  per mL to 1  $\mu\text{g}$  per mL. Each dilution (50  $\mu\text{L}$ ) was placed into a well of a 96-well microtiter plate (Becton Dickinson and Company, Franklin Lakes, NJ; catalog #353077). Test bacterial species were obtained from the American Type Culture Collection (ATCC) and consisted of *Pseudomonas aeruginosa* ATCC 27853, *Escherichia coli* ATCC 25922, *Bacillus cereus* ATCC 10987, *Staphylococcus aureus* ATCC 25923, *Enterococcus faecium* ATCC 19434, and *Enterococcus faecalis* ATCC 19433. Three to four isolated bacterial colonies, grown overnight on Mueller Hinton II agar plates at 37°C, were suspended into pre-warmed cation-adjusted Mueller Hinton broth (10 mL) and incubated at 37°C until the optical density reached approximately 1.0 McFarland standard. The cultures were then adjusted to a 0.5 McFarland standard (equivalent to approximately  $1 - 2 \times 10^8$  cells per mL) then diluted 1/10 twice, in cation-adjusted Mueller Hinton broth, to produce  $1 \times 10^6$  cells per mL. This dilution (50  $\mu\text{L}$ ) was added to microtiter wells containing the test polymers. This resulted in a final cell concentration of  $5 \times 10^5$  per mL and one-half concentration of the polymer in a final volume of 0.1 mL. A control well containing no polymer was used as a positive growth control. The microtiter plates were incubated at 37°C for 16 – 20 h. The MIC was defined as the lowest concentration of polymer to completely inhibit bacterial growth. Statistical significance of differences was determined by ANOVA.

Hemolysis assays were conducted using 0.1 M phosphate buffer (pH 7.4) as described by Murthy et al.(60) except washed sheep RBC were used. Washed sheep red blood cells (RBCs), containing approximately  $10^8$  RBCs per 200  $\mu\text{L}$  in 100 mM phosphate buffer (PB, pH 7.4), was added to PB (800  $\mu\text{L}$ ), containing a known amount of polymer, in 1.5 mL microcentrifuge tubes. The final concentration of polymer in the assay tubes varied as a series of two-fold dilutions from  $1024 \mu\text{g mL}^{-1}$  to  $0.125 \mu\text{g mL}^{-1}$ . The contents of the microcentrifuge tubes were mixed by inversion and the tubes placed in a water bath at 37 °C for 1 h. After 30 min incubation, the tubes were again mixed by inversion. The positive control consisted of RBCs (200  $\mu\text{L}$ ) mixed with distilled deionized water (800  $\mu\text{L}$ ) while the negative control consisted of RBCs (200  $\mu\text{L}$ ) mixed with PB (800  $\mu\text{L}$ ) alone. After incubation, the tubes were centrifuged at 16,000  $\text{xg}$  for 5 min, then the supernatants were measured for absorbance at 541 nm with negative control serving as the blank. Percent hemolysis was determined by dividing the absorbance of the sample by the absorbance of the positive control then multiplying by 100.

**Thin-section TEM of Bacteria.** *E. coli* (ATCC 25922) and *S. aureus* (ATCC 25923) were grown to logarithmic phase in MHBc (OD600 = 1.0). The bacterial suspension was washed with PBS buffer (pH 7.0) twice, and was resuspended in the same amount of PBS buffer. An aqueous solution of **Acopolymer-1** was added to the bacterial suspension, and the mixture was incubated at 37 °C for 30 min. The bacterial suspension was washed with PBS buffer, and was resuspended in the same amount of 2.5% glutaraldehyde in sodium cacodylate buffer (pH = 7). After fixing, samples were then placed in 2% osmium tetroxide in PBS buffer (pH = 7.0), dehydrated in a graded series of ethyl alcohol and embedded in Epon resin. Ultrathin sections of 80 nm were cut with a Reichert-Jung Ultracut E ultramicrotome and placed on formvar coated slot copper grids. Sections were then counterstained with uranyl acetate and lead citrate and viewed with a FEI Tecnai12 BioTwinG<sup>2</sup> electron microscope. Digital images were acquired with an AMT XR-60 CCD Digital Camera system.

**Lipid Vesicle Preparation (11, 12).** Two stock buffer solutions were used: buffer A (20 mM calcein, 10 mM Na<sub>2</sub>HPO<sub>4</sub>, pH 7.0) and buffer B (10 mM Na<sub>2</sub>HPO<sub>4</sub>, 90 mM NaCl, pH 7.0). Appropriate amounts of each lipid mixture (DOPC 25 mg; POPE/POPG 20 mg/15.6 mg; 1, 1', 2, 2'-tetraoleoyl cardiolipin (CL) (sodium salt) 47.8 mg) were dissolved in buffer A (1 mL), followed by stirring for 1 h. The suspension was subjected to five freeze-thaw cycles, and was extruded five times through a polycarbonate membrane (Whatman, pore size 100 nm). The external calcein was removed by gel filtration (Sephadex G-25 resin) in buffer B. After gel filtration, the solution was typically diluted 7-fold to yield a final lipid concentration of around 4.5 mM in buffer B. The above vesicle solution (100 μL) was diluted in buffer B (9.9 mL) to make the stock vesicle solution (45 μM).

**Dye Leakage Experiments of Lipid Vesicles (11, 12).** The stock vesicle solution (100 μL) and buffer B (900 μL) were mixed in a fluorimeter cuvette. The fluorescence signal was allowed to stabilize ( $\lambda_{\text{excitation}} = 490 \text{ nm}$ ,  $\lambda_{\text{emission}} = 510 \text{ nm}$ ) for 100 s at 37 °C before addition of polymer solution (1 μg mL<sup>-1</sup> or 4 μg mL<sup>-1</sup>). The change in fluorescence over 5 min was recorded followed by the addition of 20% Triton X-100 (50 μL) to determine the maximum fluorescence of the dye. The dye leakage percentage was calculated according to equation (1):

$$\text{dye leakage percentage} = 100[(I_t - I_0)/(I_\infty - I_0)] \quad (1)$$

Where  $I_0$  is the fluorescence intensity before the addition of samples, and  $I_\infty$  is the fluorescence intensity after the addition of 20% Triton X-100.

**Potassium Release Assay (13).** Potassium ion release assays were performed by following the method of Silverman et al. (13). *E. coli* (ATCC 25922) and *S. aureus* (ATCC 25923) were grown to late logarithmic phase in MHBc (OD600 = 1.0). The bacterial suspension was washed twice with 10 mM HEPES (pH 7.2) and 0.5% glucose, and was resuspended in the same amount of 10 mM HEPES (pH 7.2) and 0.5% glucose. The bacterial suspension (2 mL) was placed in a fluorimeter cuvette containing a stir bar. The fluorescence of the bacterial suspension was allowed to stabilize for 60 s at 37 °C ( $\lambda_{\text{excitation}} = 346 \text{ nm}$ ,  $\lambda_{\text{emission}} = 505 \text{ nm}$ ) before the addition of PBF1-AM (potassium indicator, 1 μM). Data were collected for an additional 2 min to establish a baseline signal before the addition of polymers (32 μg mL<sup>-1</sup>). The fluorescence signals were collected for each sample over

1000 s. For the control sample, valinomycin ( $10 \mu\text{g mL}^{-1}$ ) was added to the sample solution and stirred for 1000 s, followed by the addition of KCl (1 mM) to demonstrate continued indicator responsiveness. Data were normalized relative to the fluorescent signal change in 1000 s after the addition of valinomycin according to equation (2).

$$\text{Potassium release percentage} = 100[(I_t - I_0)/(I_\infty - I_t)] \quad (2)$$

Where  $I_0$  is  $I_t$  before the addition of polymers,  $I_t$  is the fluorescence intensity before the addition of valinomycin, and  $I_\infty$  is the fluorescence intensity at 1000 s after the addition of valinomycin.

**Membrane Depolarization Assay.** Both *E. coli* (ATCC 25922) and *S. aureus* (ATCC 25923) were grown to logarithmic phase in MHBc (OD600 = 0.05). The bacterial suspension was washed with HEPES buffer (5 mM, pH 7.4) twice, and was resuspended in the same amount of HEPES buffer (5 mM, pH 7.4). A final concentration of 0.2 mM EDTA (pH 7.4) was added to the bacterial suspension. The bacterial suspension (2 mL) was transferred to a fluorescence cuvette, diSC<sub>3</sub>5 was added at a final concentration of 0.4  $\mu\text{M}$  and the mixture equilibrated at 37 °C. The fluorescence was allowed to quench for 20-30 min before the addition of 100 mM KCl. The fluorescence was allowed to stabilize for 60 s before the addition of valinomycin, Acopolymer-1, Rcopolymer-8, Homopolymer-11 or Homopolymer-13. The fluorescence change thereafter was recorded for 1 h.

The residual cell viability of the bacteria in the membrane depolarization assay was assessed. At regular intervals (0, 5, 15, 45 and 60 min) an aliquot of the bacterial suspension was plated on MH agar plates and incubated at 37 °C for 24 h (*E. coli*) or 48 h (*S. aureus*), and residual colony forming units (CFU) were determined.

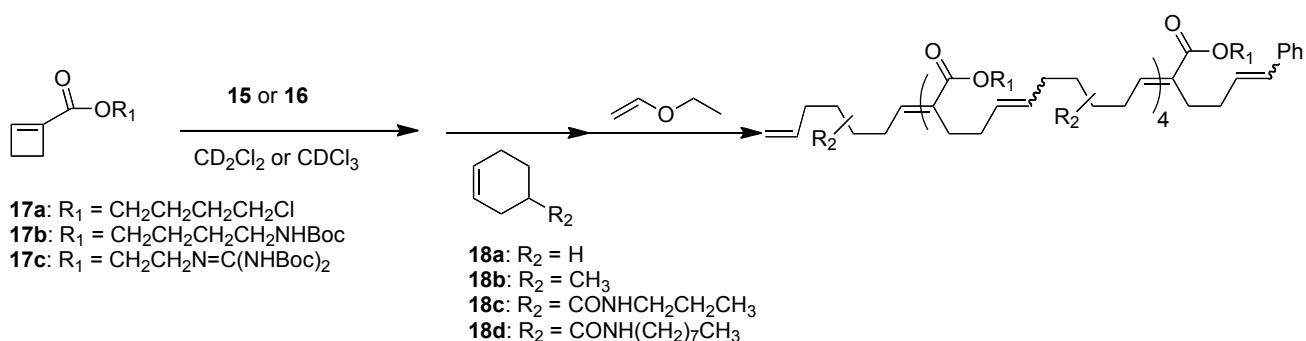

| A          | B          | Cat.      | [Ru] (M) | [A]:[B]:[Ru] | Rxn time (h) | Product                   | % conv <sup>a</sup> |
|------------|------------|-----------|----------|--------------|--------------|---------------------------|---------------------|
| <b>17a</b> | <b>18a</b> | <b>15</b> | 0.01     | 25:50:1      | 5            | <b>Intermediate-1</b>     | 90 <sup>b</sup>     |
| <b>17a</b> | <b>18b</b> | <b>15</b> | 0.01     | 25:50:1      | 2            | <b>Intermediate-2</b>     | 92 <sup>c</sup>     |
| <b>17a</b> | <b>18c</b> | <b>15</b> | 0.01     | 25:50:1      | 3            | <b>Intermediate-3</b>     | 92 <sup>c</sup>     |
| <b>17a</b> | <b>18d</b> | <b>15</b> | 0.01     | 25:50:1      | 5            | <b>Intermediate-4</b>     | 96 <sup>c</sup>     |
| <b>17a</b> | <b>18a</b> | <b>16</b> | 0.01     | 25:50:1      | 4            | <b>Intermediate-5 (4)</b> | 92 <sup>c</sup>     |
| <b>17b</b> | <b>18a</b> | <b>15</b> | 0.01     | 25:50:1      | 2            | <b>Intermediate-6</b>     | 97 <sup>c</sup>     |
| <b>17c</b> | <b>18a</b> | <b>15</b> | 0.01     | 25:50:1      | 2            | <b>Intermediate-7</b>     | 95 <sup>c</sup>     |

**Table S1.** AROMP of 1-substituted cyclobutene esters with cyclohexenes. All AROMP reactions were monitored by <sup>1</sup>H-NMR spectroscopy. <sup>a</sup>Percent conversion determined by integration of <sup>1</sup>H-NMR spectra unless specified otherwise. <sup>b</sup>Reaction was performed in CD<sub>2</sub>Cl<sub>2</sub> at rt. <sup>c</sup>Reaction was performed in CDCl<sub>3</sub> at 50 °C.

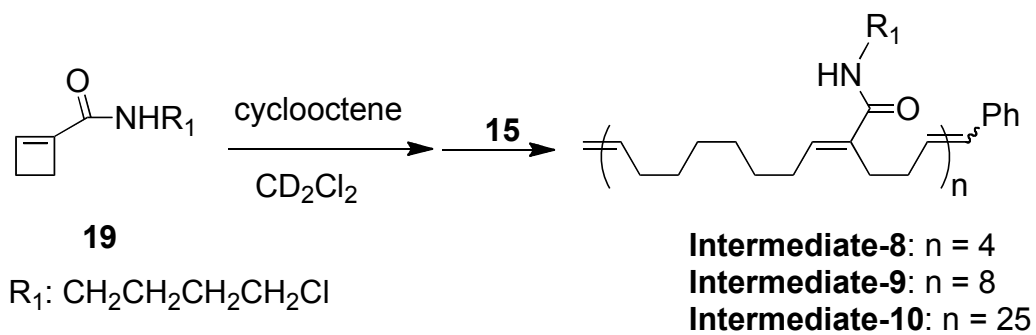

| <b>A</b>  | <b>B</b>    | Cat.      | [Ru] (M) | [A]:[B]:[Ru] | Rxn time (h) | Product                | % conv <sup>a</sup> |
|-----------|-------------|-----------|----------|--------------|--------------|------------------------|---------------------|
| <b>19</b> | cyclooctene | <b>15</b> | 0.01     | 4:4:1        | 2            | <b>Intermediate-8</b>  | >99                 |
| <b>19</b> | cyclooctene | <b>15</b> | 0.01     | 8:8:1        | 2            | <b>Intermediate-9</b>  | >99                 |
| <b>19</b> | cyclooctene | <b>15</b> | 0.01     | 25:25:1      | 2            | <b>Intermediate-10</b> | >99                 |

**Table S2.** Synthesis of random copolymers. All ROMP reactions were performed in  $\text{CD}_2\text{Cl}_2$  and monitored by  $^1\text{H-NMR}$  spectroscopy at rt. <sup>a</sup>Percent conversion determined by integration of  $^1\text{H-NMR}$  spectra unless specified otherwise.

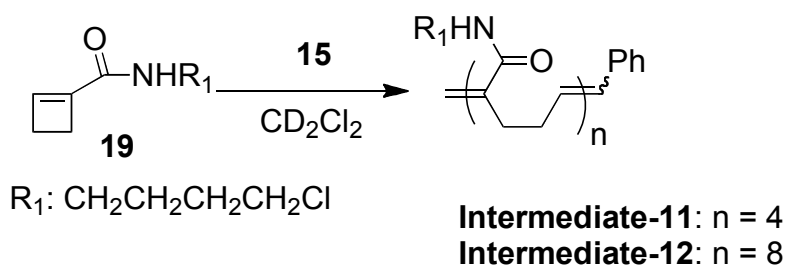

| [Ru] (M) | [A]:[Ru] | Rxn time (h) | Product                | % conv <sup>a</sup> |
|----------|----------|--------------|------------------------|---------------------|
| 0.01     | 4:1      | 4            | <b>Intermediate-11</b> | 93                  |
| 0.01     | 8:1      | 3            | <b>Intermediate-12</b> | 92                  |

**Table S3.** Synthesis of Homopolymers. All ROMP reactions were performed in  $\text{CD}_2\text{Cl}_2$  and monitored by  $^1\text{H-NMR}$  spectroscopy. <sup>a</sup>Percent conversion determined by integration of  $^1\text{H-NMR}$  spectra unless specified otherwise. <sup>b</sup>Calculated  $M_n$  was calculated based on conversion yields of monomers. <sup>c</sup>Molecular weight and PDI were determined by GPC using polystyrene standards.



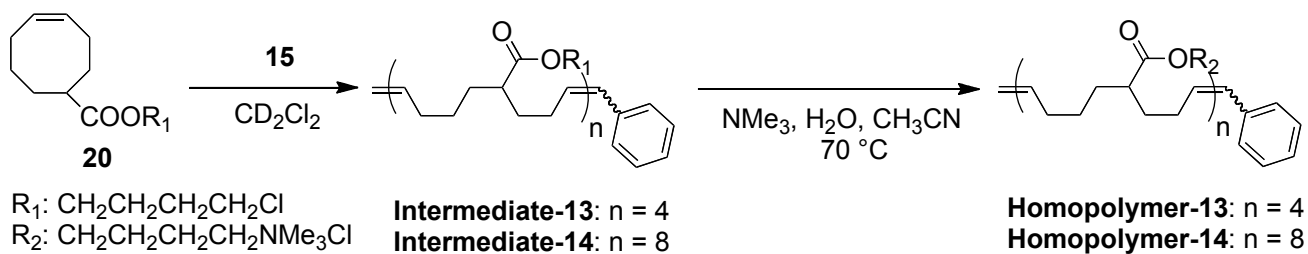

| [Ru]<br>(M) | [A]:[Ru] | Rxn<br>time<br>(h) | Product                | % conv <sup>a</sup> | Calcd.<br>$M_n^b$ | PSS<br>$M_n^c$ | PDI  |
|-------------|----------|--------------------|------------------------|---------------------|-------------------|----------------|------|
| 0.01        | 4:1      | 1                  | <b>Intermediate-13</b> | 99                  | 1083              | 1265           | 1.33 |
| 0.01        | 8:1      | 1                  | <b>Intermediate-14</b> | 99                  | 2062              | 2256           | 1.23 |

**Table S4.** Synthesis of **Homopolymer-13** and **Homopolymer-14**. All ROMP reactions were performed in  $\text{CD}_2\text{Cl}_2$  and monitored by  $^1\text{H-NMR}$  spectroscopy. <sup>a</sup>Percent conversion determined by integration of  $^1\text{H-NMR}$  spectra unless specified otherwise. <sup>b</sup>Calculated  $M_n$  was calculated based on conversion yields of monomers. <sup>c</sup>Molecular weight and PDI were determined by GPC using polystyrene standards.

| Polymer                 | Calcd. $M_n$ | PSS $M_n^a$ | PDI |
|-------------------------|--------------|-------------|-----|
| <b>Acopolymer-1</b>     | 6874         | 2154        | 1.8 |
| <b>Acopolymer-2</b>     | 7225         | 1265        | 2.4 |
| <b>Acopolymer-3</b>     | 9002         | 1436        | 1.6 |
| <b>Acopolymer-4</b>     | 10755        | 1443        | 1.6 |
| <b>Acopolymer-5 (4)</b> | 6874         | 1327        | 2.1 |
| <b>Acopolymer-6</b>     | 8891         | 2141        | 1.3 |
| <b>Acopolymer-7</b>     | 11744        | 2235        | 1.6 |
| <b>Rcopolymer-8</b>     | 1295         | 830         | 1.4 |
| <b>Rcopolymer-9</b>     | 2495         | 2800        | 2.5 |
| <b>Rcopolymer-10</b>    | 7575         | 9363        | 2.1 |
| <b>Homopolymer-11</b>   | 855          | 589         | 3.5 |
| <b>Homopolymer-12</b>   | 1606         | 2052        | 1.3 |
| <b>Homopolymer-13</b>   | 1083         | 1265        | 1.3 |
| <b>Homopolymer-14</b>   | 2062         | 2256        | 1.2 |

**Table S5. GPC characterization of polymers.** <sup>a</sup>Molecular weight and PDI were determined by GPC using polystyrene standards.

| Polymer<br>(MW) <sup>1</sup><br>CLogP <sub>rel</sub> <sup>2</sup> | MIC, µg mL <sup>-1</sup> (µM)     |                              |                                |                                |                                  |                                 | HC <sub>50</sub><br>µg/mL<br>(µM) |
|-------------------------------------------------------------------|-----------------------------------|------------------------------|--------------------------------|--------------------------------|----------------------------------|---------------------------------|-----------------------------------|
|                                                                   | <i>P. aeruginosa</i><br>ATCC27853 | <i>E. coli</i> ATCC<br>25922 | <i>B. cereus</i><br>ATCC 10987 | <i>S. aureus</i><br>ATCC 25923 | <i>E. faecalis</i><br>ATCC 19433 | <i>E. faecium</i><br>ATCC 19434 |                                   |
| <b>Acopolymer-1</b><br>(2154)<br>0                                | 160 (74)                          | 40 (19)                      | 12 (6)                         | 6 (3)                          | 10 (5)                           | 10 (5)                          | 256<br>(119)                      |
| <b>Acopolymer-2</b><br>(1265)<br>0.3                              | >256 (>202)                       | 160 (126)                    | 40 (32)                        | 12 (9)                         | 24 (19)                          | 24 (19)                         | 768<br>(607)                      |
| <b>Acopolymer-3</b><br>(1436)<br>0                                | >256 (>178)                       | >256 (>178)                  | 64 (45)                        | 32 (22)                        | 128 (89)                         | 64 (45)                         | >1024<br>(>713)                   |
| <b>Acopolymer-4</b><br>(1443)<br>1.6                              | >256 (>179)                       | 256 (179)                    | 24 (17)                        | 24 (17)                        | 24 (17)                          | 24 (17)                         | 192<br>(134)                      |
| <b>Acopolymer-5</b><br>(1327)<br>0                                | 256 (193)                         | 64 (48)                      | 40 (30)                        | 12 (9)                         | 20 (15)                          | 20 (15)                         | 1024<br>(772)                     |
| <b>Acopolymer-6</b><br>(2141)<br>n.d. <sup>3</sup>                | 192 (90)                          | 64 (30)                      | 96 (45)                        | 48 (22)                        | 64 (30)                          | 32 (15)                         | 1024<br>(478)                     |
| <b>Acopolymer-7</b><br>(2235)<br>n.d.                             | 32 (14)                           | 12 (5)                       | 12 (5)                         | 6 (3)                          | 12 (5)                           | 12 (5)                          | 512<br>(229)                      |
| <b>Rcopolymer-8</b><br>(830)<br>0                                 | >256 (>308)                       | >256 (>308)                  | 32 (39)                        | 16 (19)                        | 16 (19)                          | 16 (19)                         | 512<br>(617)                      |
| <b>Rcopolymer-9</b><br>(2800)<br>0                                | >256 (>91)                        | 256 (91)                     | 32 (11)                        | 16 (6)                         | 16 (6)                           | 16 (6)                          | >1024<br>(>366)                   |
| <b>Rcopolymer-10</b><br>(9363)<br>0                               | >256 (>27)                        | >256 (>27)                   | 48 (5)                         | 24 (3)                         | 24 (3)                           | 24 (3)                          | >1024<br>(>109)                   |
| <b>Homopolymer-11</b><br>(589)<br>-2.9                            | >512 (>869)                       | >512 (>869)                  | >512 (>869)                    | 384 (652)                      | >512 (>869)                      | >512 (>869)                     | >2048<br>(>3477)                  |
| <b>Homopolymer-12</b><br>(2052)<br>-2.9                           | >512 (>250)                       | >512 (>250)                  | 320 (156)                      | 288 (140)                      | 320 (156)                        | 320 (156)                       | >2048<br>(>998)                   |
| <b>Homopolymer-13</b><br>(1265)<br>-0.3                           | 128 (101)                         | 32 (25)                      | 12 (9)                         | 8 (6)                          | 8 (6)                            | 8 (6)                           | 379<br>(300)                      |
| <b>Homopolymer-14</b><br>(2256)<br>-0.3                           | >256 (>113)                       | 64 (28)                      | 16 (7)                         | 8 (4)                          | 8 (4)                            | 8 (4)                           | 443<br>(196)                      |

**Table S6.** Antibacterial and hemolytic activities of **Acopolymer-1** to **Homopolymer-14**. The data shown are the average of triplicate measurements for two independent replicates.

<sup>1</sup>The MW is the experimentally determined number-average molecular weight (Table S5). <sup>2</sup>The CLogP's were calculated according to Crippen's fragmentation ( $\beta$ ) using ChemDraw Ultra 12.0 for the ring-opened AB dyads (copolymers) or A monomers (homopolymer). The CLogP<sub>rel</sub> is relative to **Acopolymer-1** that was arbitrarily set to 0. A more positive CLogP is more hydrophobic than **Acopolymer-1** and conversely, a more negative CLogP is less hydrophobic. The standard deviation of the calculation is  $\pm 0.5$ . <sup>3</sup>n.d., not determined.

| Polymer               | %Dye leakage ([vesicle] = 4.5 $\mu\text{M}$ ) <sup>a</sup> |                                                       |                                                |
|-----------------------|------------------------------------------------------------|-------------------------------------------------------|------------------------------------------------|
|                       | POPE/POPG (3/1)<br>([Polymer] = 4 $\mu\text{g mL}^{-1}$ )  | Cardiolipin ([Polymer] =<br>4 $\mu\text{g mL}^{-1}$ ) | DOPC ([Polymer] = 1<br>$\mu\text{g mL}^{-1}$ ) |
| <b>Acopolymer-1</b>   | 76 $\pm$ 5                                                 | 65 $\pm$ 2                                            | 83 $\pm$ 3                                     |
| <b>Acopolymer-2</b>   | 62 $\pm$ 2                                                 | 75 $\pm$ 1                                            | 37 $\pm$ 3                                     |
| <b>Acopolymer-3</b>   | 37 $\pm$ 3                                                 | 20 $\pm$ 1                                            | 9 $\pm$ 9                                      |
| <b>Acopolymer-4</b>   | 71 $\pm$ 3                                                 | 37 $\pm$ 2                                            | 50 $\pm$ 1                                     |
| <b>Acopolymer-5</b>   | 82 $\pm$ 1                                                 | 49 $\pm$ 1                                            | 37 $\pm$ 4                                     |
| <b>Acopolymer-6</b>   | 85 $\pm$ 4                                                 | 45 $\pm$ 1                                            | 58 $\pm$ 4                                     |
| <b>Acopolymer-7</b>   | 98 $\pm$ 1                                                 | 69 $\pm$ 4                                            | 85 $\pm$ 4                                     |
| <b>Rcopolymer-8</b>   | 23 $\pm$ 7                                                 | 50 $\pm$ 1                                            | 28 $\pm$ 2                                     |
| <b>Rcopolymer-9</b>   | 47 $\pm$ 1                                                 | 34 $\pm$ 3                                            | 41 $\pm$ 2                                     |
| <b>Rcopolymer-10</b>  | 50 $\pm$ 1                                                 | 49 $\pm$ 1                                            | 50 $\pm$ 4                                     |
| <b>Homopolymer-11</b> | 19 $\pm$ 1                                                 | 13 $\pm$ 2                                            | 2 $\pm$ 1                                      |
| <b>Homopolymer-12</b> | 22 $\pm$ 9                                                 | 11 $\pm$ 1                                            | 2 $\pm$ 1                                      |
| <b>Homopolymer-13</b> | 92 $\pm$ 5                                                 | 59 $\pm$ 2                                            | 77 $\pm$ 6                                     |
| <b>Homopolymer-14</b> | 80 $\pm$ 2                                                 | 51 $\pm$ 1                                            | 65 $\pm$ 7                                     |

**Table S7.** Dye leakage percentages of **Acopolymer-1** to **Homopolymer-14** in 5 min. <sup>a</sup>Percent dye release was calculated as the ratio of fluorescence observed upon polymer addition to the fluorescence observed after adding Triton X-100.

| Polymer               | %Potassium release <sup>a</sup> |                  |
|-----------------------|---------------------------------|------------------|
|                       | <i>E. coli</i>                  | <i>S. aureus</i> |
| <b>Acopolymer-1</b>   | 47 ± 5                          | 77 ± 6           |
| <b>Acopolymer-2</b>   | 21 ± 16                         | 37 ± 7           |
| <b>Acopolymer-3</b>   | 18 ± 10                         | 19 ± 2           |
| <b>Acopolymer-4</b>   | 36 ± 7                          | 33 ± 5           |
| <b>Acopolymer-5</b>   | 35 ± 7                          | 70 ± 10          |
| <b>Acopolymer-6</b>   | 49 ± 19                         | 73 ± 17          |
| <b>Acopolymer-7</b>   | 41 ± 17                         | 42 ± 4           |
| <b>Rcopolymer-8</b>   | 27 ± 14                         | 18 ± 5           |
| <b>Rcopolymer-9</b>   | 21 ± 7                          | 24 ± 5           |
| <b>Rcopolymer-10</b>  | 19 ± 9                          | 30 ± 17          |
| <b>Homopolymer-11</b> | 8 ± 1                           | 7 ± 1            |
| <b>Homopolymer-12</b> | 8 ± 2                           | 10 ± 3           |
| <b>Homopolymer-13</b> | 55 ± 8                          | 69 ± 13          |
| <b>Homopolymer-14</b> | 40 ± 10                         | 65 ± 5           |

**Table S8.** Potassium release percentages of **Acopolymer-1** to **Homopolymer-14** in 16 min. <sup>a</sup>Percent potassium release was calculated as the ratio of fluorescence observed upon polymer addition to the fluorescence observed after adding valinomycin.

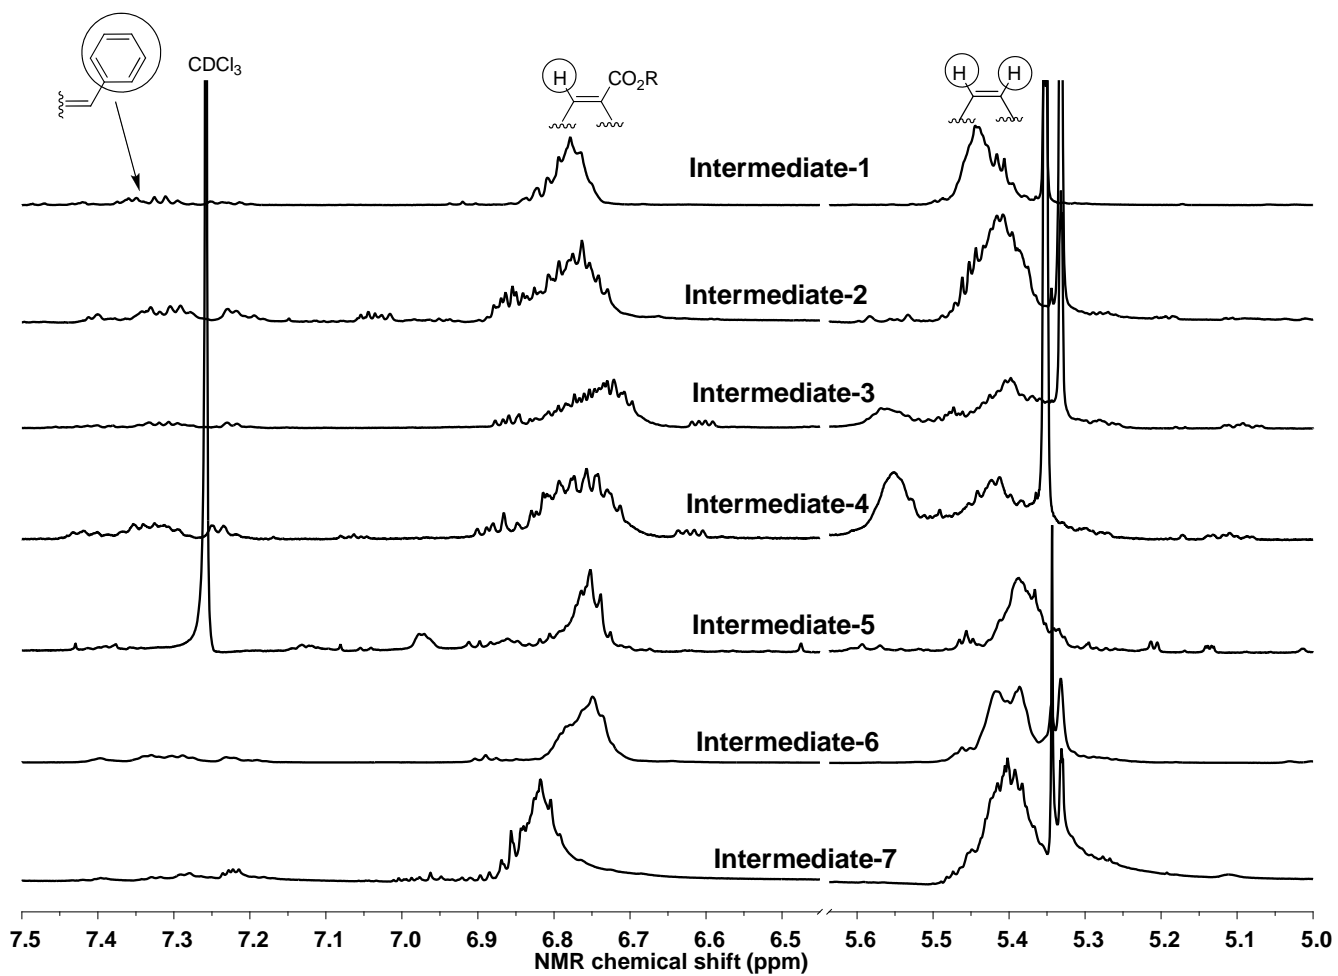

**Figure S1.** <sup>1</sup>H-NMR spectra of **Intermediate-1** to **Intermediate-7**.

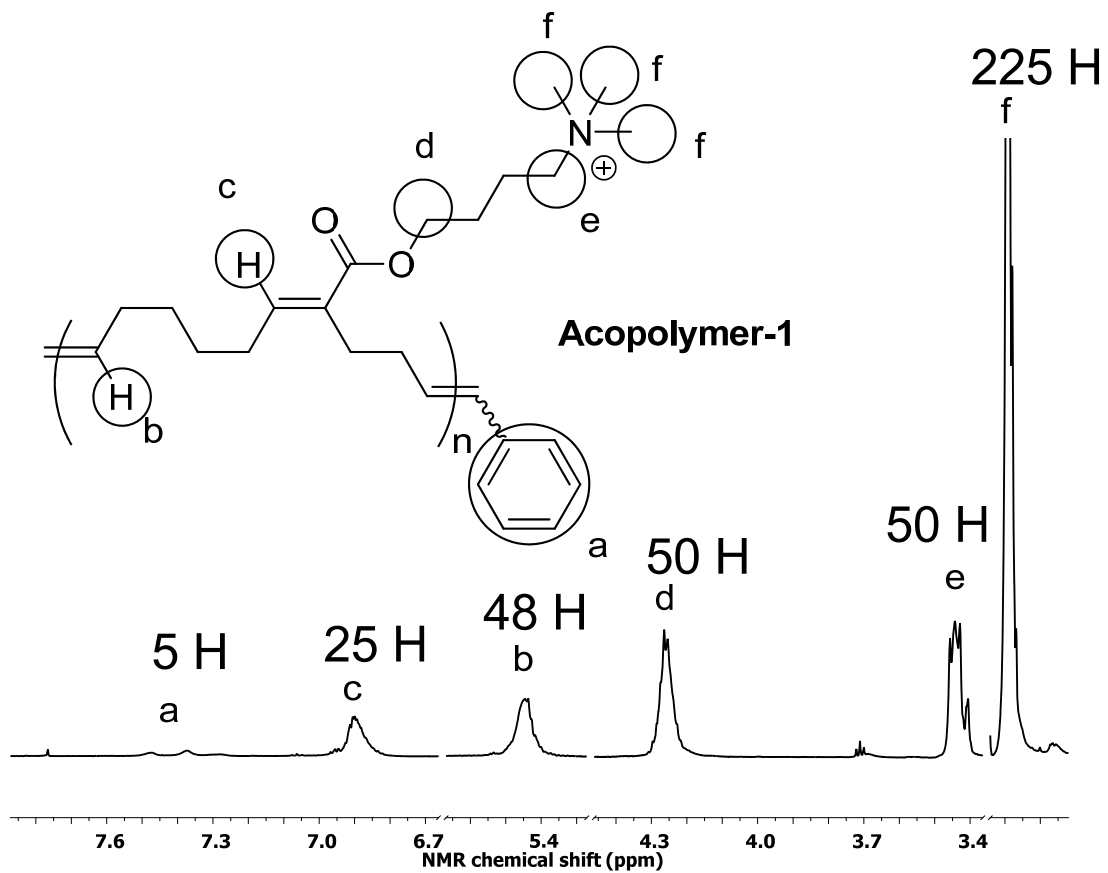

Figure S2. <sup>1</sup>H-NMR spectrum of Acopolymer-1.

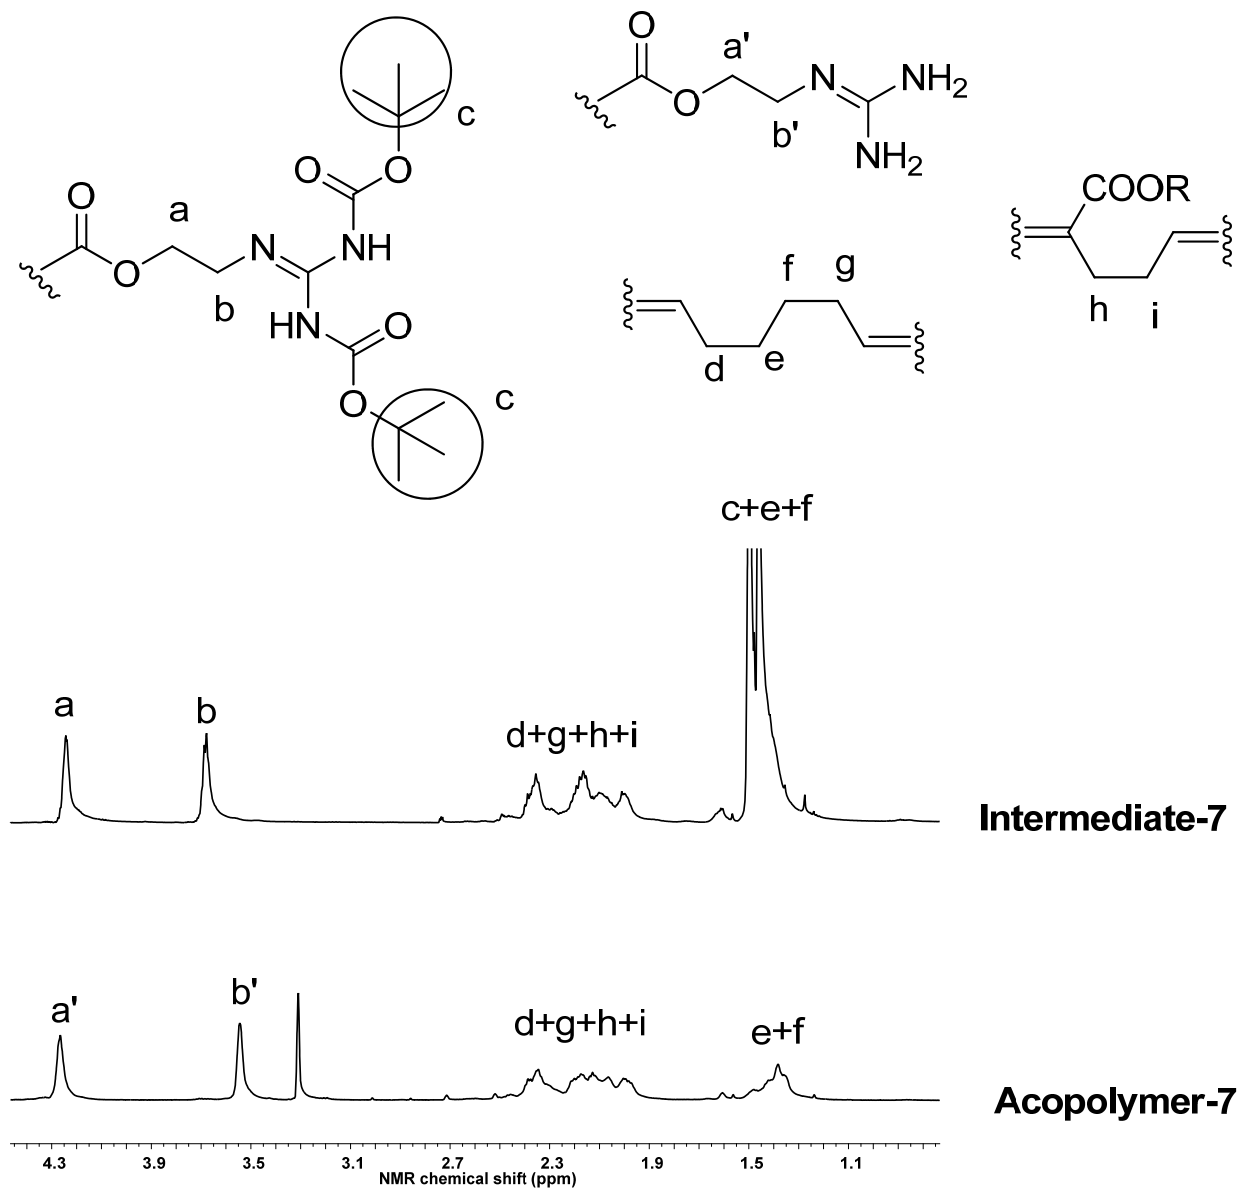

**Figure S3.** <sup>1</sup>H-NMR spectra of **Intermediate-7** and **Acopolymer-7**.



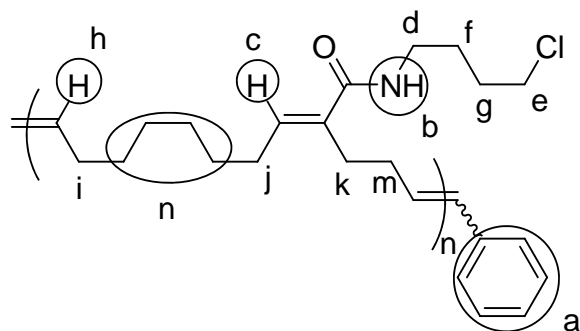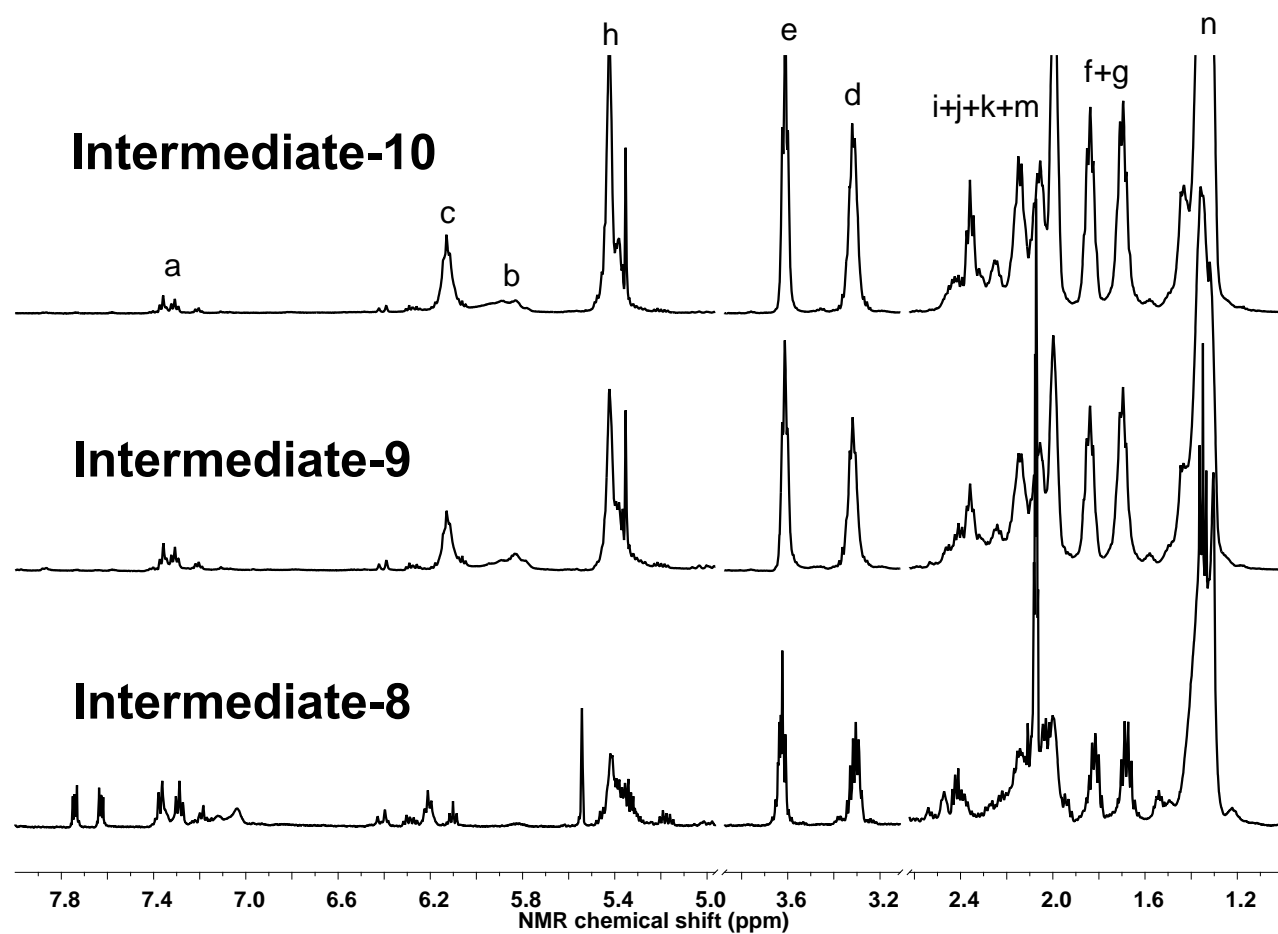

Figure S4.  $^1\text{H}$ -NMR spectra of **Intermediate-8** to **Intermediate-10**.

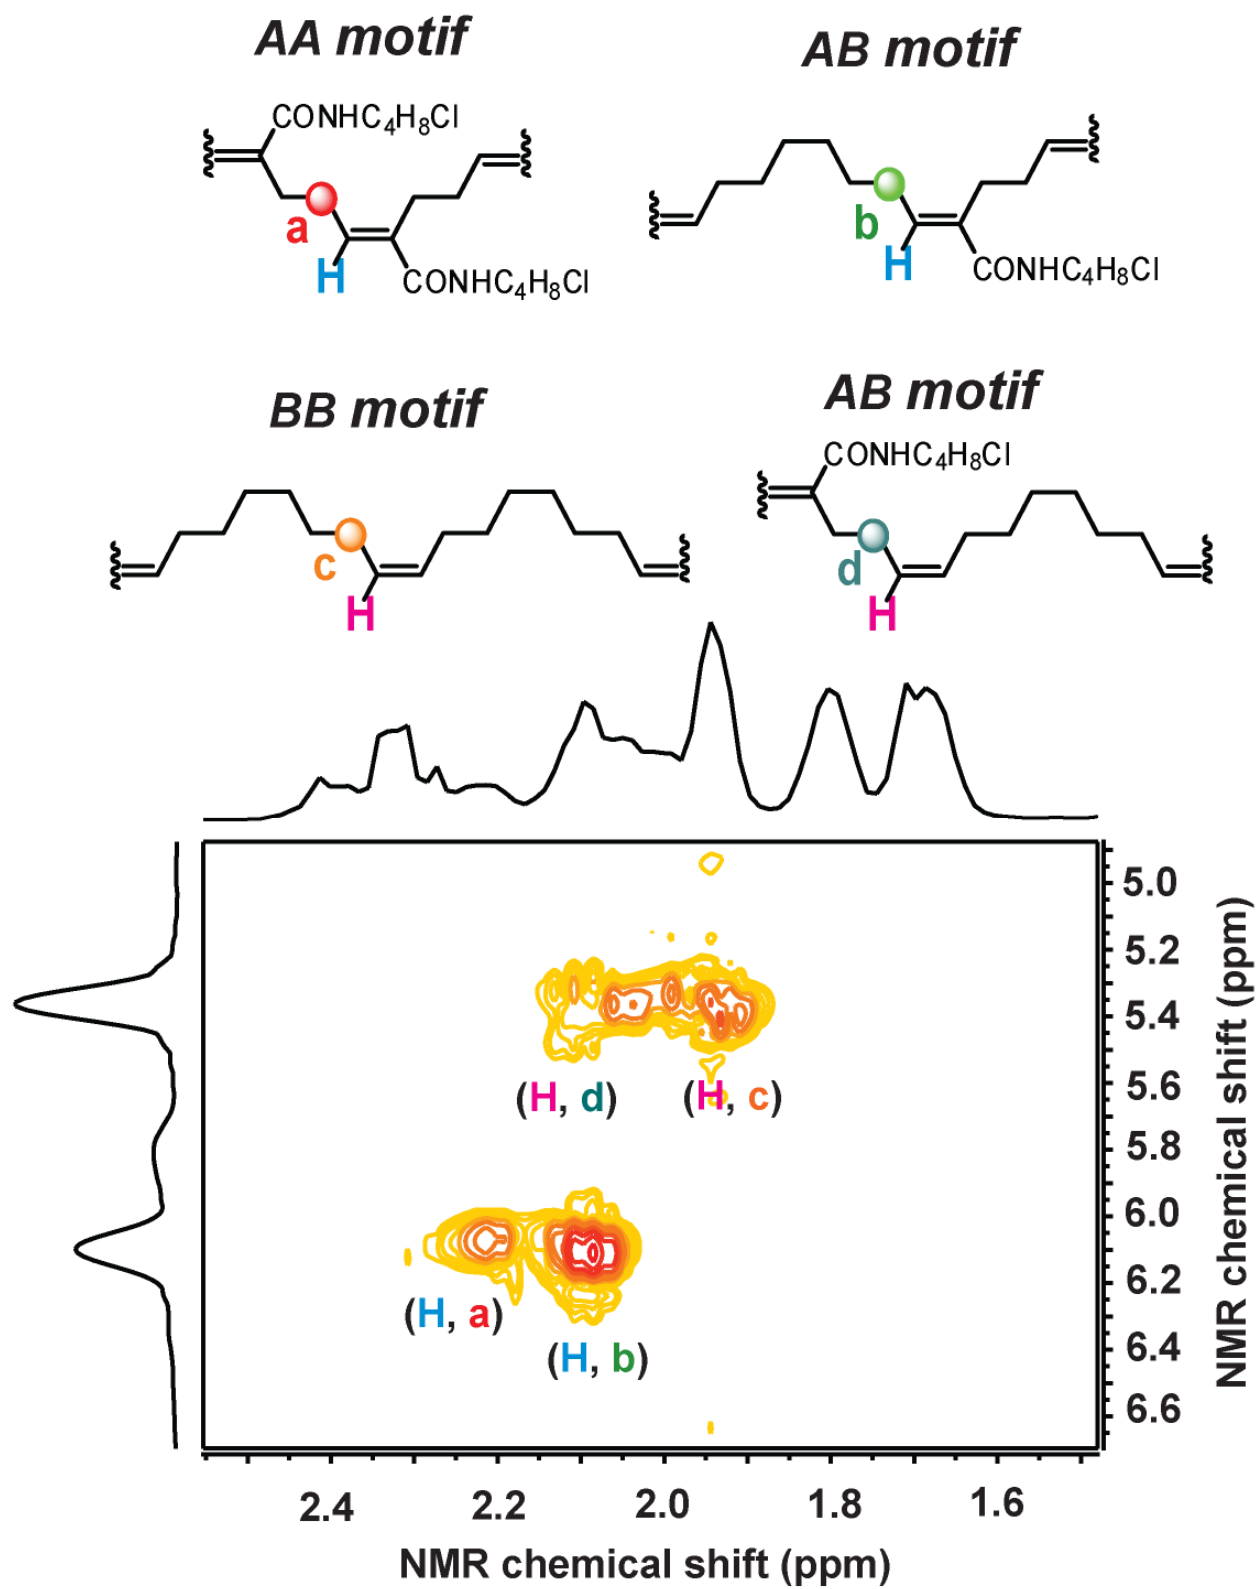

Figure S5.  $^1\text{H}$ - $^1\text{H}$  gCOSY NMR spectrum of Intermediate-10.

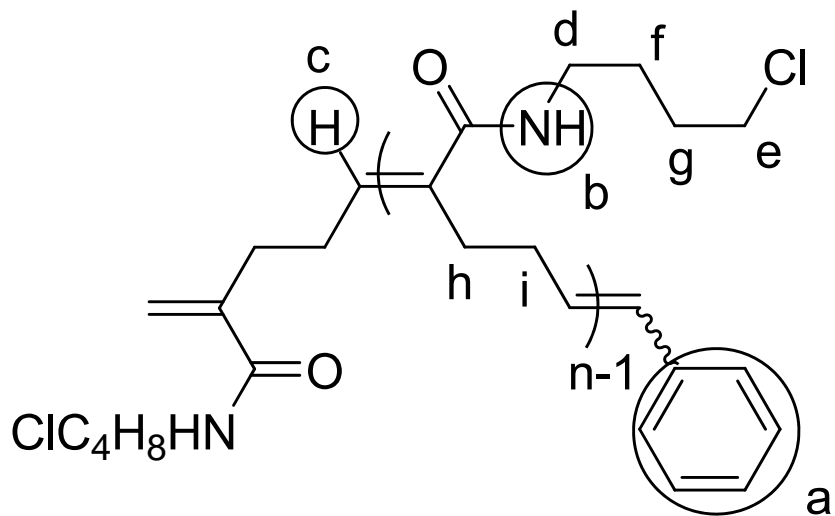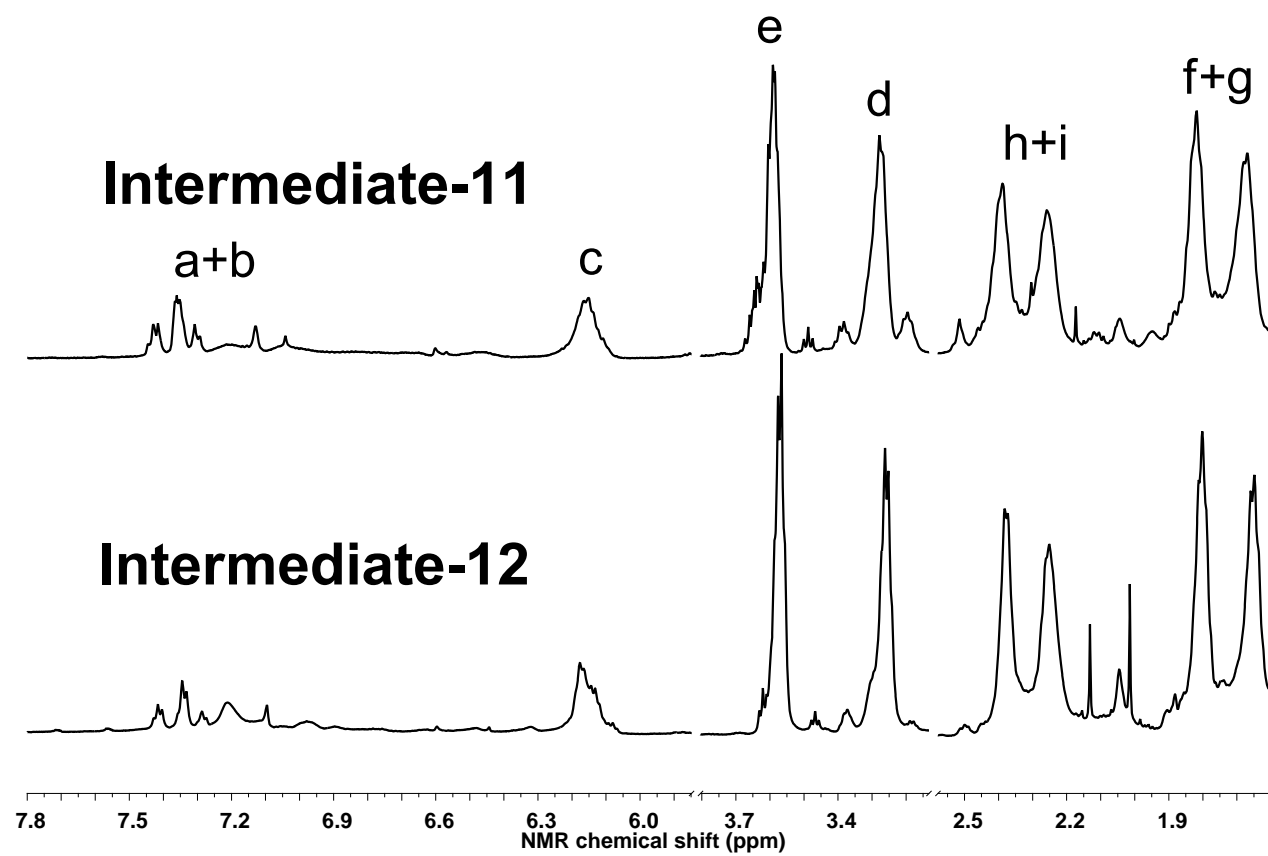

Figure S6.  $^1\text{H}$ -NMR spectra of **Intermediate-11** and **Intermediate-12**.

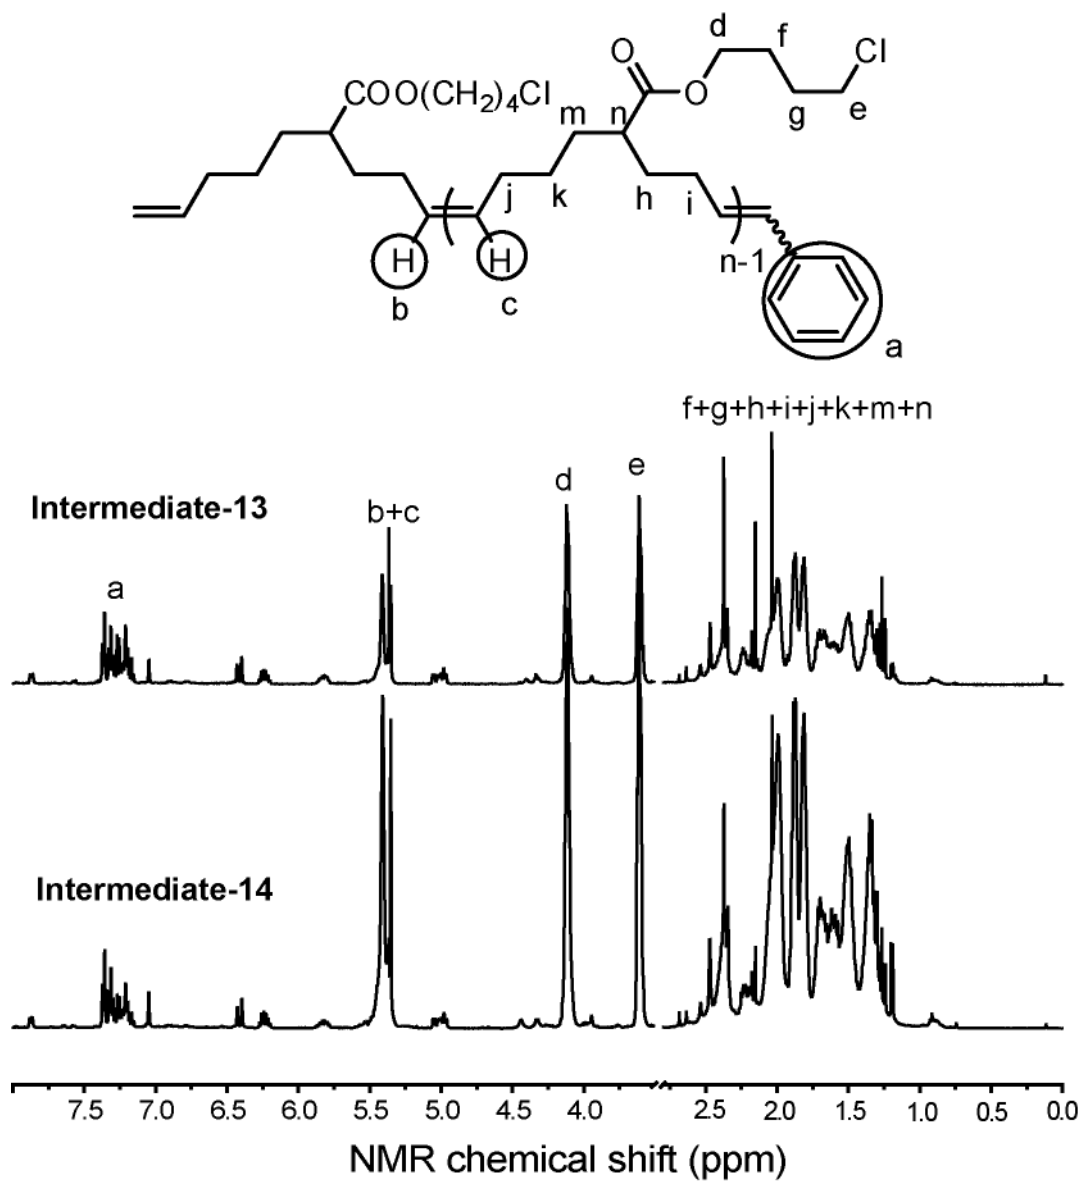

**Figure S7.**  $^1\text{H-NMR}$  spectra of **Intermediate-13** and **Intermediate-14**.

## References

1. Love, J. A., Morgan, J. P., Trnka, T. M., and Grubbs, R. H. (2002) A practical and highly active ruthenium-based catalyst that effects the cross metathesis of acrylonitrile, *Angew. Chem. Int. Ed.* **41**, 4035-4037.
2. Lee, J. C., Parker, K. A., and Sampson, N. S. (2006) Amino acid-bearing ROMP polymers with a stereoregular backbone, *J. Am. Chem. Soc.* **128**, 4578-4579.
3. Campbell, A., and Rydon, H. N. (1953) The synthesis of caryophyllenic acid, *J. Chem. Soc.*, 3002-3008.
4. Song, A., Parker, K. A., and Sampson, N. S. (2010) Cyclic Alternating ROMP (CAROMP). Rapid Access to Functionalized Cyclic Polymers, *Org. Lett.* **12**, 3729-3731.
5. Sommen, G. L., Linden, A., and Heimgartner, H. (2005) First synthesis of a selenazepane, *Tetrahedron Lett.* **46**, 6723-6725.
6. Ashby, E. C., and Pham, T. N. (1986) The use of 5-halocyclooctenes as a radical probe. Reactions with lithium aluminum hydride, *J. Org. Chem.* **51**, 3598-3602.
7. Bloodworth, A. J., Melvin, T., and Mitchell, J. C. (1988) Mechanistic aspects of oxygen transfer by gem-dialkylperoxonium ions, *J. Org. Chem.* **53**, 1078-1082.
8. Ghose, A. K., and Crippen, G. M. (1987) Atomic physicochemical parameters for three-dimensional-structure-directed quantitative structure-activity relationships. 2. Modeling dispersive and hydrophobic interactions, *J. Chem. Inf. Comput. Sci.* **27**, 21-35.
9. CLSI, (Ed.) (2006) *Methods for Dilution Antimicrobial Susceptibility Tests for Bacteria That Grow Aerobically, 6th ed., Approved Standard M7-A6*, Clinical and Laboratory Standards Institute, Wayne, PA.
10. Murthy, N., Robichaud, J. R., Tirrell, D. A., Stayton, P. S., and Hoffman, A. S. (1999) The design and synthesis of polymers for eukaryotic membrane disruption, *J. Control. Release* **61**, 137-143.
11. Mason, A. J., Moussaoui, W., Abdelrahman, T., Boukhari, A., Bertani, P., Marquette, A., Shooshtarizaheh, P., Moulay, G., Boehm, N., Guerold, B., Sawers, R. J., Kichler, A., Metz-Boutigue, M. H., Candolfi, E., Prevost, G., and Bechinger, B. (2009) Structural determinants of antimicrobial and antiplasmodial activity and selectivity in histidine-rich amphipathic cationic peptides, *J. Biol. Chem.* **284**, 119-133.
12. Al-Badri, Z. M., Som, A., Lyon, S., Nelson, C. F., Nusslein, K., and Tew, G. N. (2008) Investigating the effect of increasing charge density on the hemolytic activity of synthetic antimicrobial polymers, *Biomacromolecules* **9**, 2805-2810.
13. Silverman, J. A., Perlmutter, N. G., and Shapiro, H. M. (2003) Correlation of daptomycin bactericidal activity and membrane depolarization in *Staphylococcus aureus*, *Antimicrob. Agents Chemother.* **47**, 2538-2544.



| Parameter                 | Value                                                                     |
|---------------------------|---------------------------------------------------------------------------|
| 1 Data File Name          | E:/ NMRdata/ 10012008-02172009/ 400/ CBC00C4H8NH-boc-C13-2052008.fid/ fid |
| 2 Title                   | CBC00C4H8NH-boc-C13-                                                      |
| 3 Origin                  | inova                                                                     |
| 4 Owner                   |                                                                           |
| 5 Solvent                 | CDCl3                                                                     |
| 6 Pulse Sequence          | s2pul                                                                     |
| 7 Acquisition Date        | 2008-12-05T08:18:01                                                       |
| 8 Modification Date       |                                                                           |
| 9 Temperature             | 25.0                                                                      |
| 10 Number of Scans        | 320                                                                       |
| 11 Spectrometer Frequency | 100.55                                                                    |
| 12 Spectral Width         | 25000.0                                                                   |
| 13 Lowest Frequency       | -2986.3                                                                   |
| 14 Nucleus                | <sup>13</sup> C                                                           |
| 15 Acquired Size          | 29984                                                                     |
| 16 Spectral Size          | 65536                                                                     |

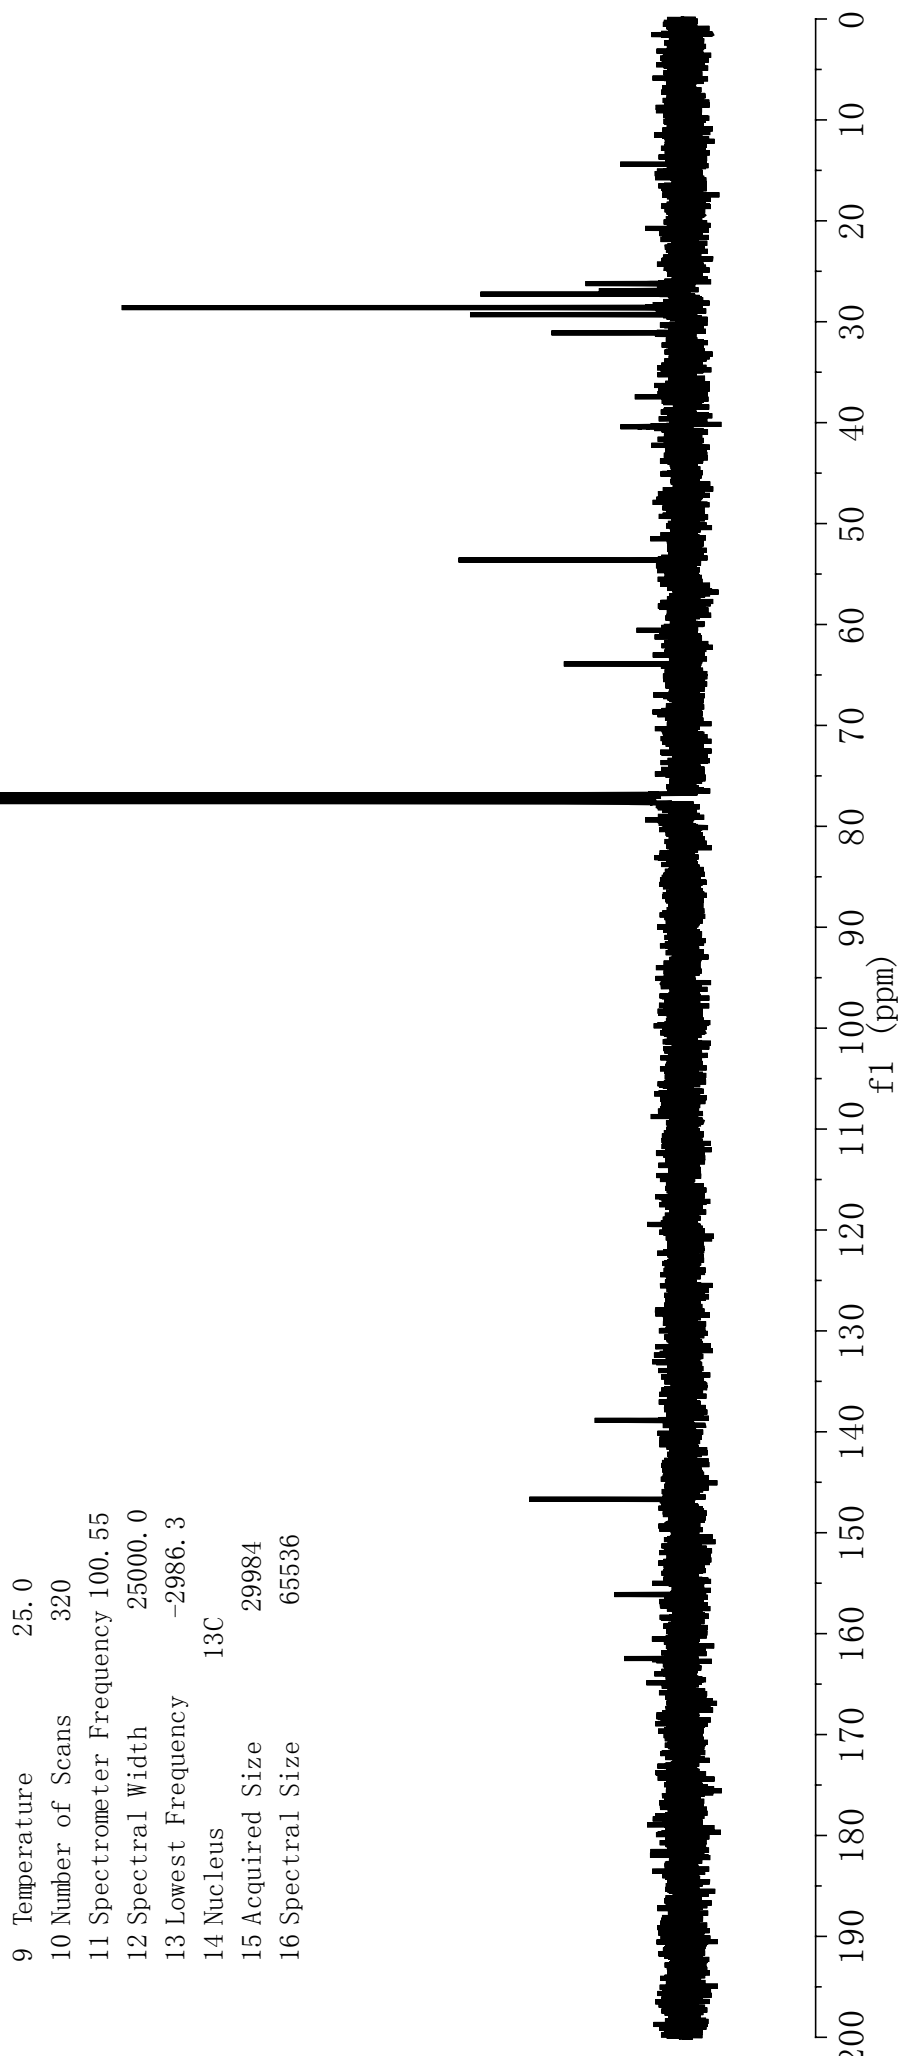

**<sup>13</sup>C-NMR spectrum of 17b**

| Parameter                 | Value                                                                     |
|---------------------------|---------------------------------------------------------------------------|
| 1 Data File Name          | E:/ NMRdata/ 02182009-09172009/ 400/ CBC00C2H4N=CNHBoc2-03192009.fid/ fid |
| 2 Title                   | CBC00C2H4N=CNHBoc2-03192009                                               |
| 3 Origin                  | inova                                                                     |
| 4 Owner                   |                                                                           |
| 5 Solvent                 | CDCl3                                                                     |
| 6 Pulse Sequence          | s2pul                                                                     |
| 7 Acquisition Date        | 2009-03-19T11:08:33                                                       |
| 8 Modification Date       |                                                                           |
| 9 Temperature             | 25.0                                                                      |
| 10 Number of Scans        | 48                                                                        |
| 11 Spectrometer Frequency | 399.83                                                                    |
| 12 Spectral Width         | 6000.6                                                                    |
| 13 Lowest Frequency       | -1000.8                                                                   |
| 14 Nucleus                | <sup>1</sup> H                                                            |
| 15 Acquired Size          | 19637                                                                     |
| 16 Spectral Size          | 65536                                                                     |

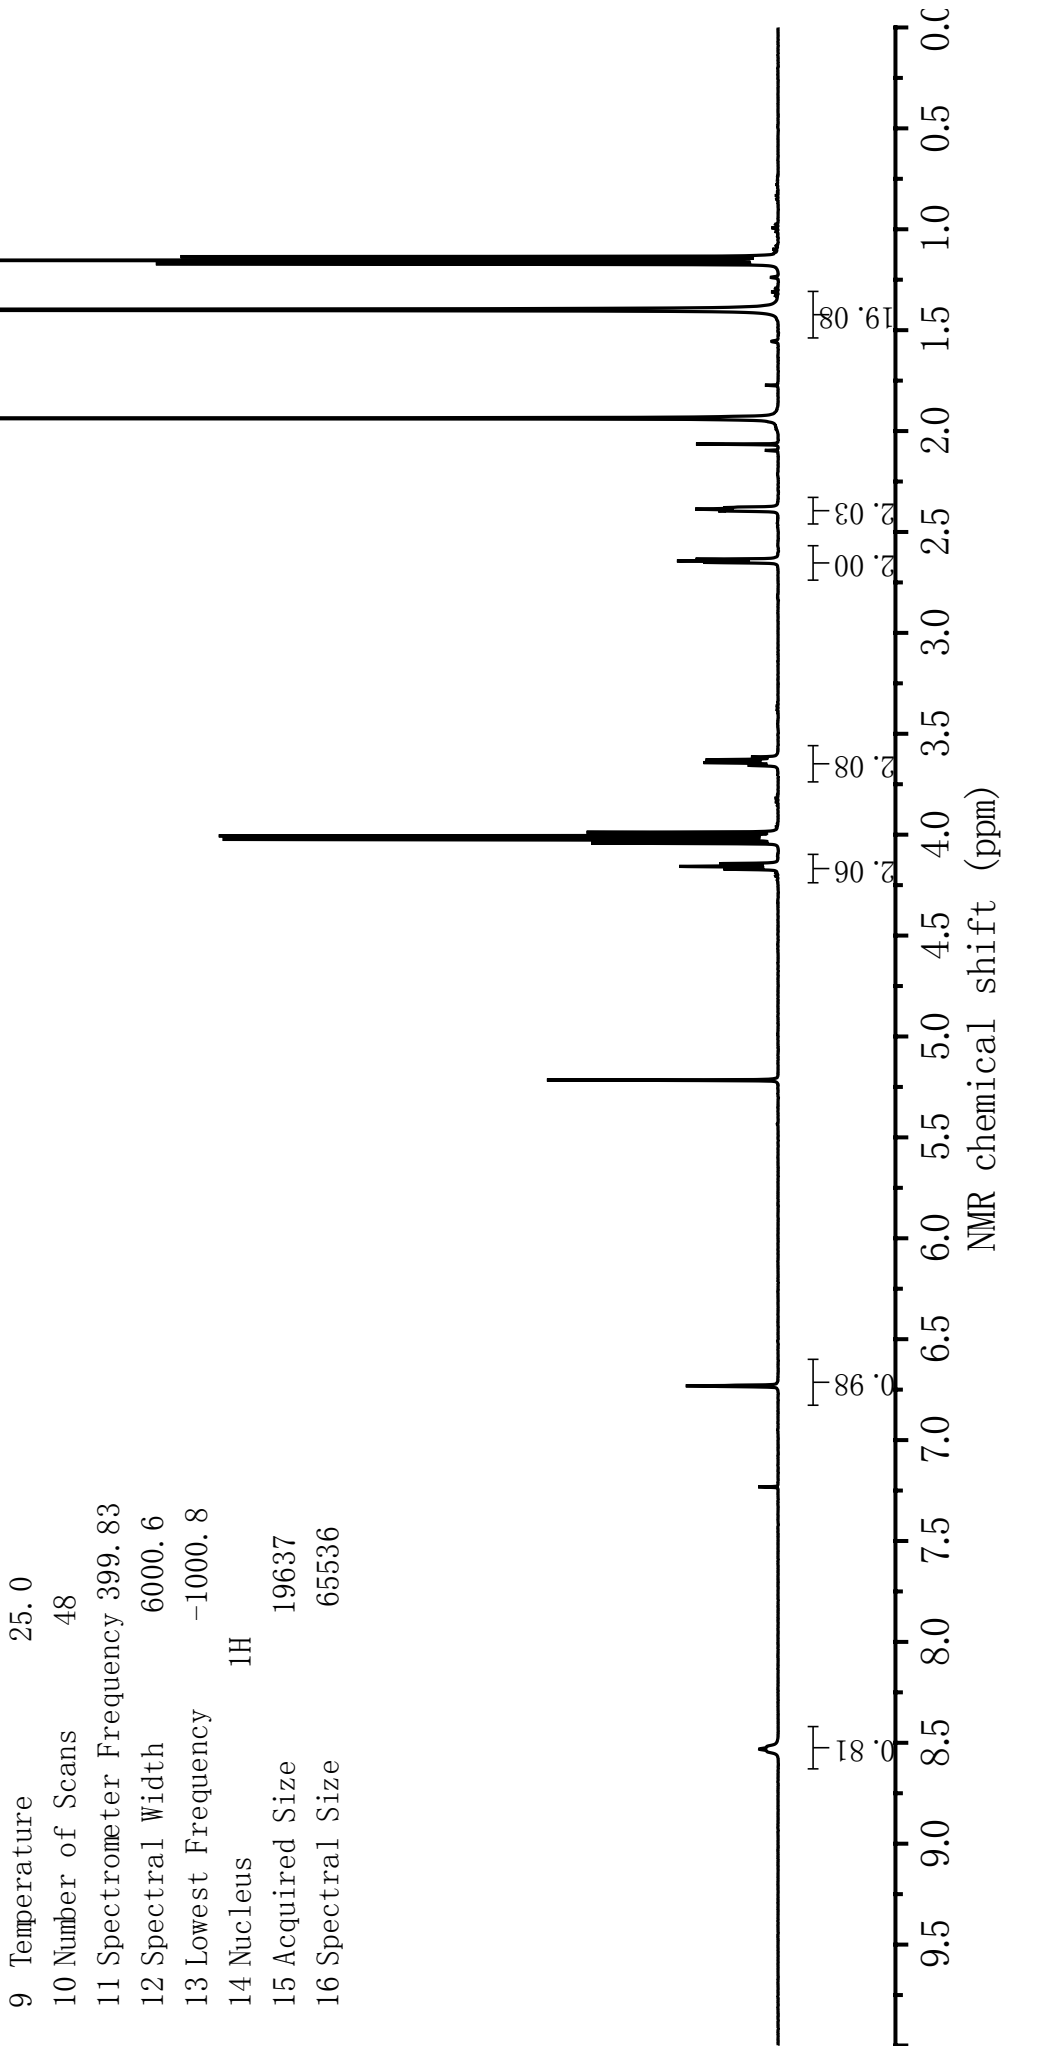

## <sup>1</sup>H-NMR spectrum of 17c



Value

Parameter

|    |                        |                                                                                  |
|----|------------------------|----------------------------------------------------------------------------------|
| 1  | Data File Name         | E:/ NMRdata/ 02182009-09172009/ 400/ CBCOOC2H4N=CNHBoc2-C13NMR-03192009.fid/ fid |
| 2  | Title                  | CBCOOC2H4N=CNHBoc2-C13NMR-03192009                                               |
| 3  | Origin                 | inova                                                                            |
| 4  | Owner                  |                                                                                  |
| 5  | Solvent                | CDCl3                                                                            |
| 6  | Pulse Sequence         | s2pul                                                                            |
| 7  | Acquisition Date       | 2009-03-19T11:18:52                                                              |
| 8  | Modification Date      |                                                                                  |
| 9  | Temperature            | 25.0                                                                             |
| 10 | Number of Scans        | 256                                                                              |
| 11 | Spectrometer Frequency | 100.55                                                                           |
| 12 | Spectral Width         | 25000.0                                                                          |
| 13 | Lowest Frequency       | -2991.0                                                                          |
| 14 | Nucleus                | 13C                                                                              |
| 15 | Acquired Size          | 29984                                                                            |
| 16 | Spectral Size          | 65536                                                                            |

S33

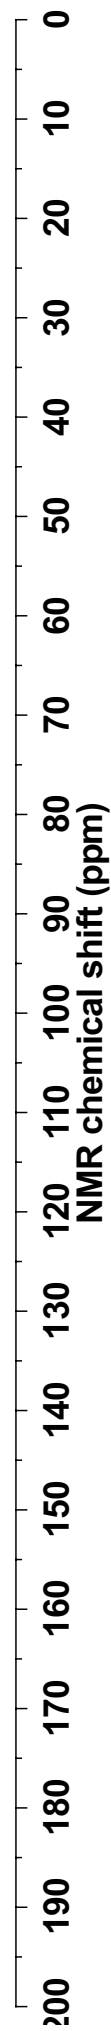

<sup>13</sup>C-NMR spectrum of 17c

Parameter

Value

1 Data File Name E:/ NMRdata/ 10012008-02172009/ 400/ cyclohexene-CONHC3H7.fid/ fid  
2 Title cyclohexene-NHC3H7  
3 Origin inova  
4 Owner  
5 Solvent CDCl3  
6 Pulse Sequence s2pul  
7 Acquisition Date 2008-10-29T06:06:46  
8 Modification Date  
9 Temperature 25.0  
10 Number of Scans 16  
11 Spectrometer Frequency 399.83  
12 Spectral Width 6000.6  
13 Lowest Frequency -1000.8  
14 Nucleus 1H  
15 Acquired Size 19637  
16 Spectral Size 65536

S34

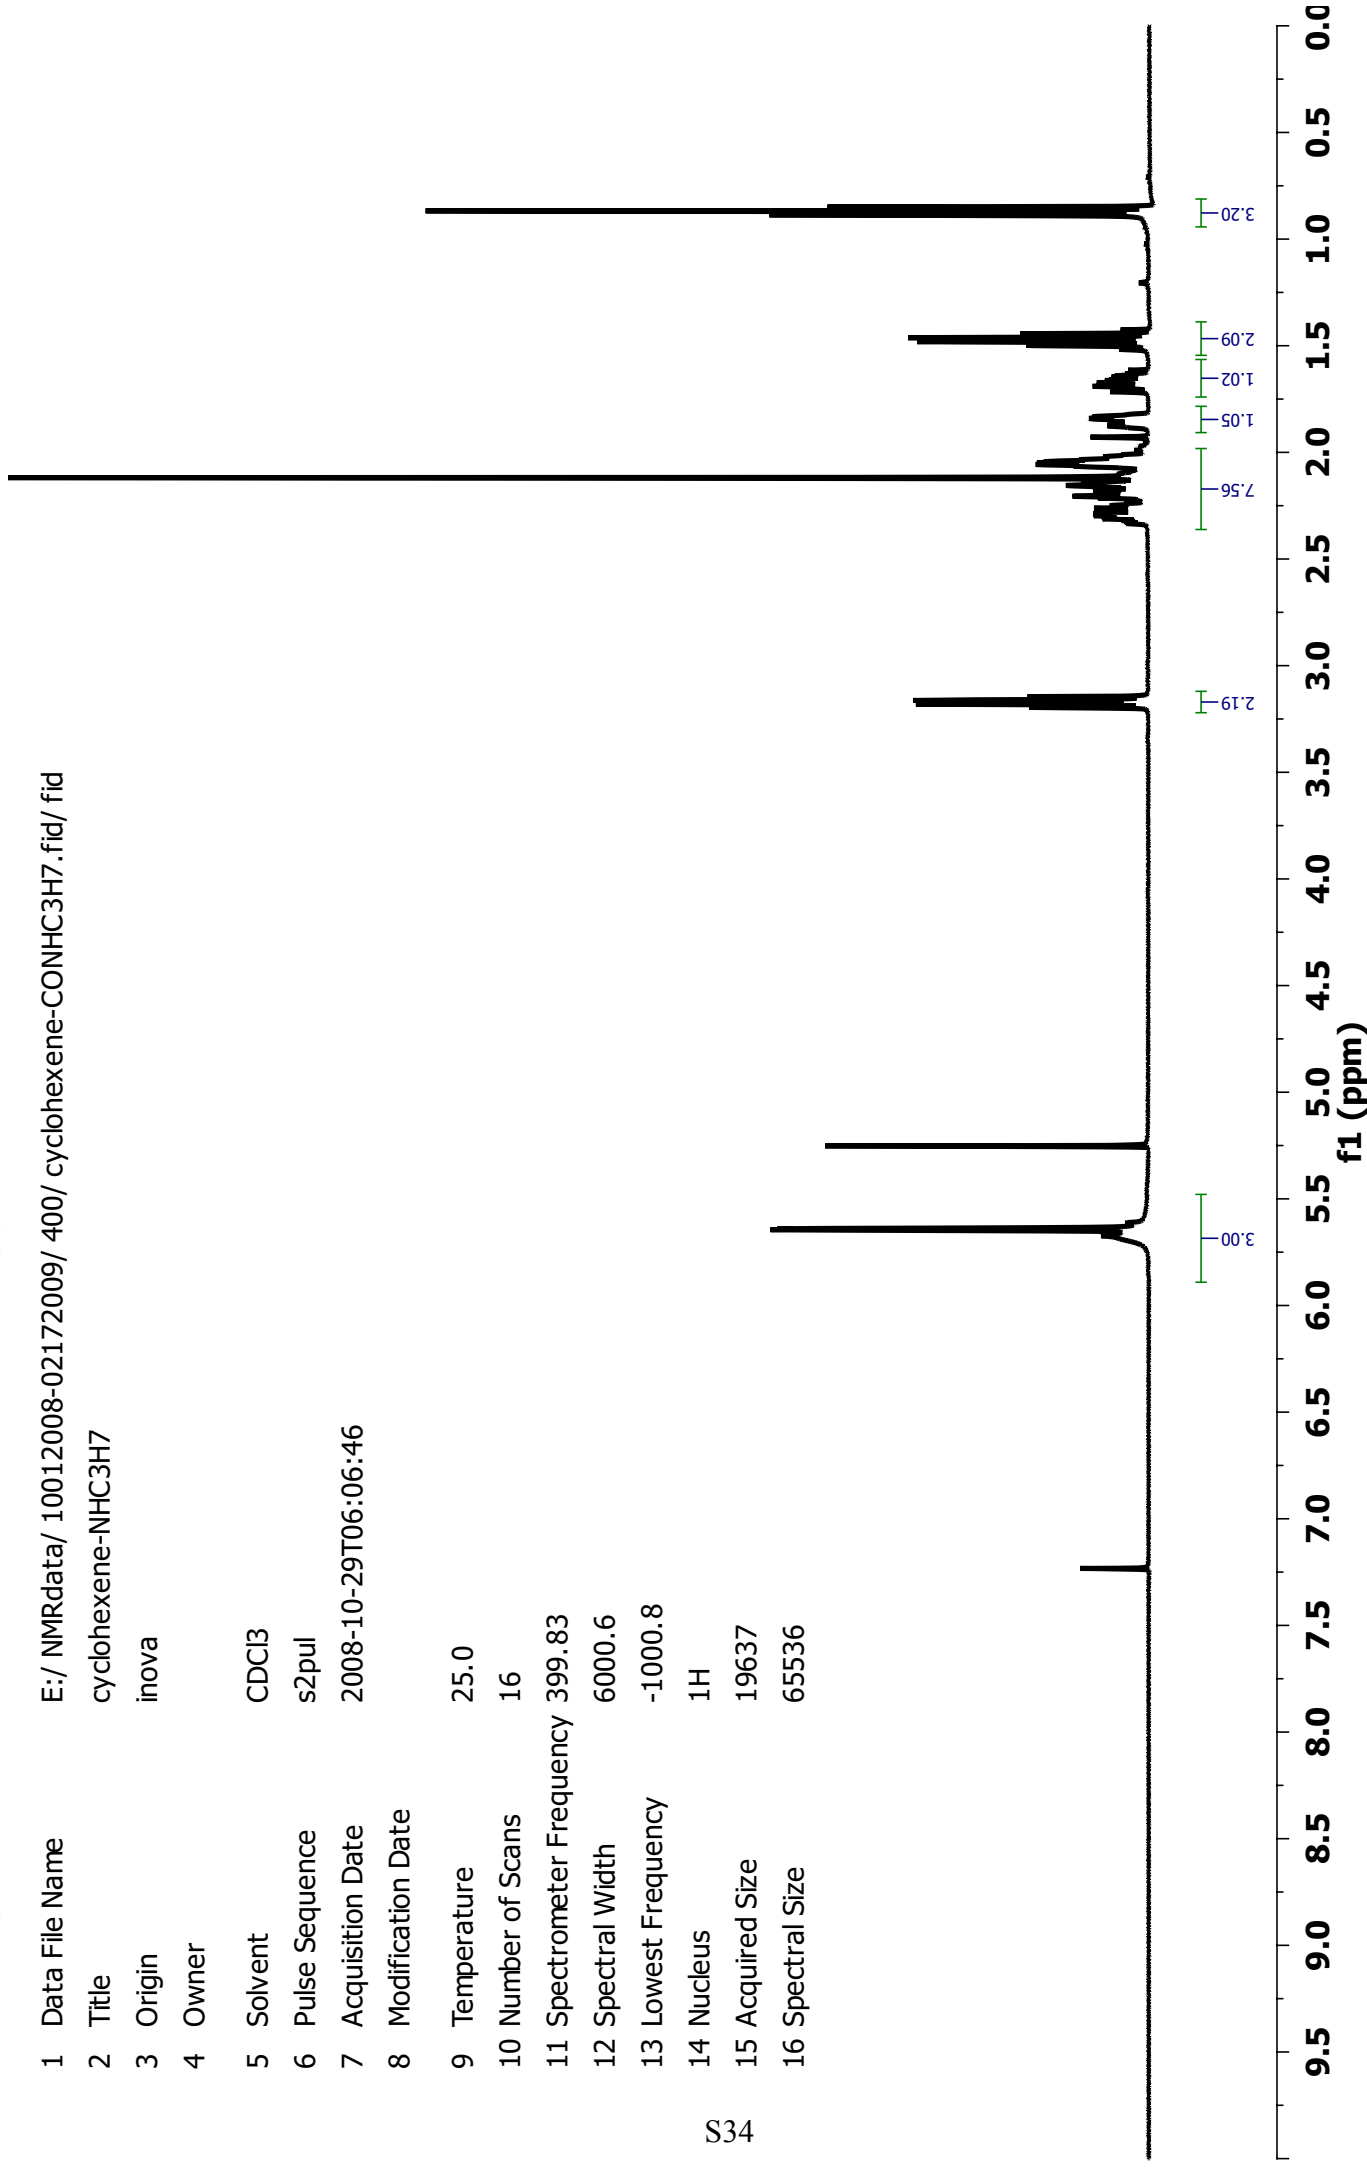

# <sup>1</sup>H-NMR spectrum of 18c

Value

Parameter

1 Data File Name E:/ NMRdata/ 10012008-02172009/ 400/ cyclohexene-CONHC3H7-C13NMR. fid/ f1  
2 Title cyclohexene-conhc3H7-C13NMR  
3 Origin inova  
4 Owner  
5 Solvent CDCl3  
6 Pulse Sequence s2pul  
7 Acquisition Date 2008-10-29T06:11:32  
8 Modification Date  
9 Temperature 25.0  
10 Number of Scans 112  
11 Spectrometer Frequency 100.55  
12 Spectral Width 25000.0  
13 Lowest Frequency -2988.3  
14 Nucleus 13C  
15 Acquired Size 29984  
16 Spectral Size 65536

S35

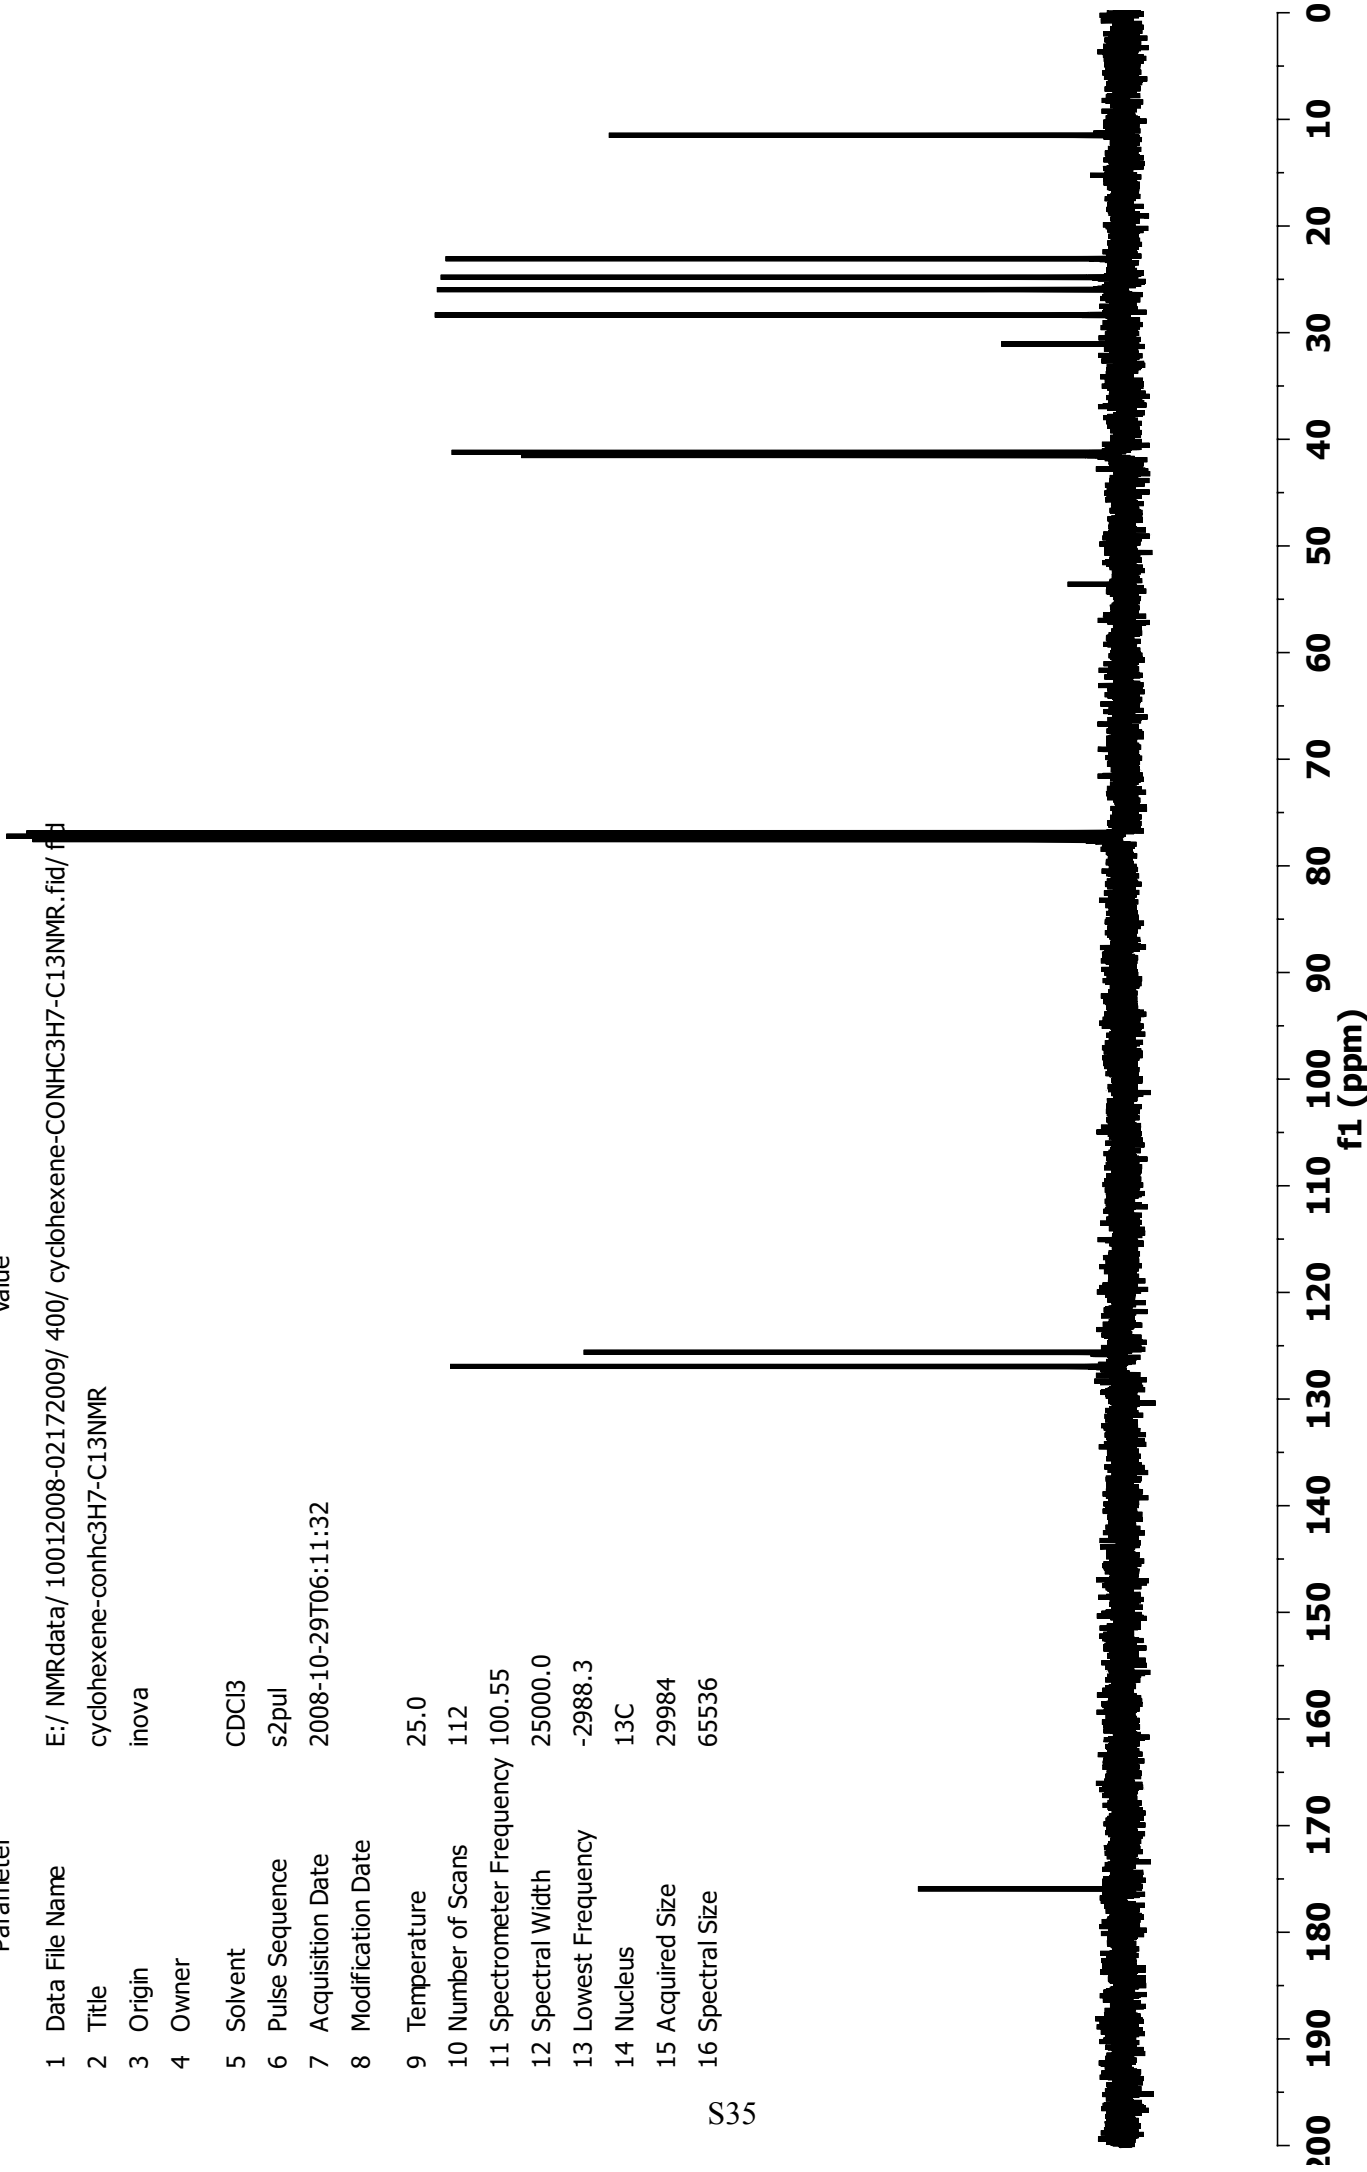

<sup>13</sup>C-NMR spectrum of 18c

Parameter

Value

1 Data File Name E:/NMRdata/10012008-02172009/400/CyclohexeneCONHC8H17.fid/ fid  
2 Title CyclohexeneCONHC8H17  
3 Origin inova  
4 Owner  
5 Solvent CDCl3  
6 Pulse Sequence s2pul  
7 Acquisition Date 2008-10-30T09:21:29  
8 Modification Date  
9 Temperature 25.0  
10 Number of Scans 16  
11 Spectrometer Frequency 399.83  
12 Spectral Width 6000.6  
13 Lowest Frequency -1000.8  
14 Nucleus <sup>1</sup>H  
15 Acquired Size 19637  
16 Spectral Size 65536

S36

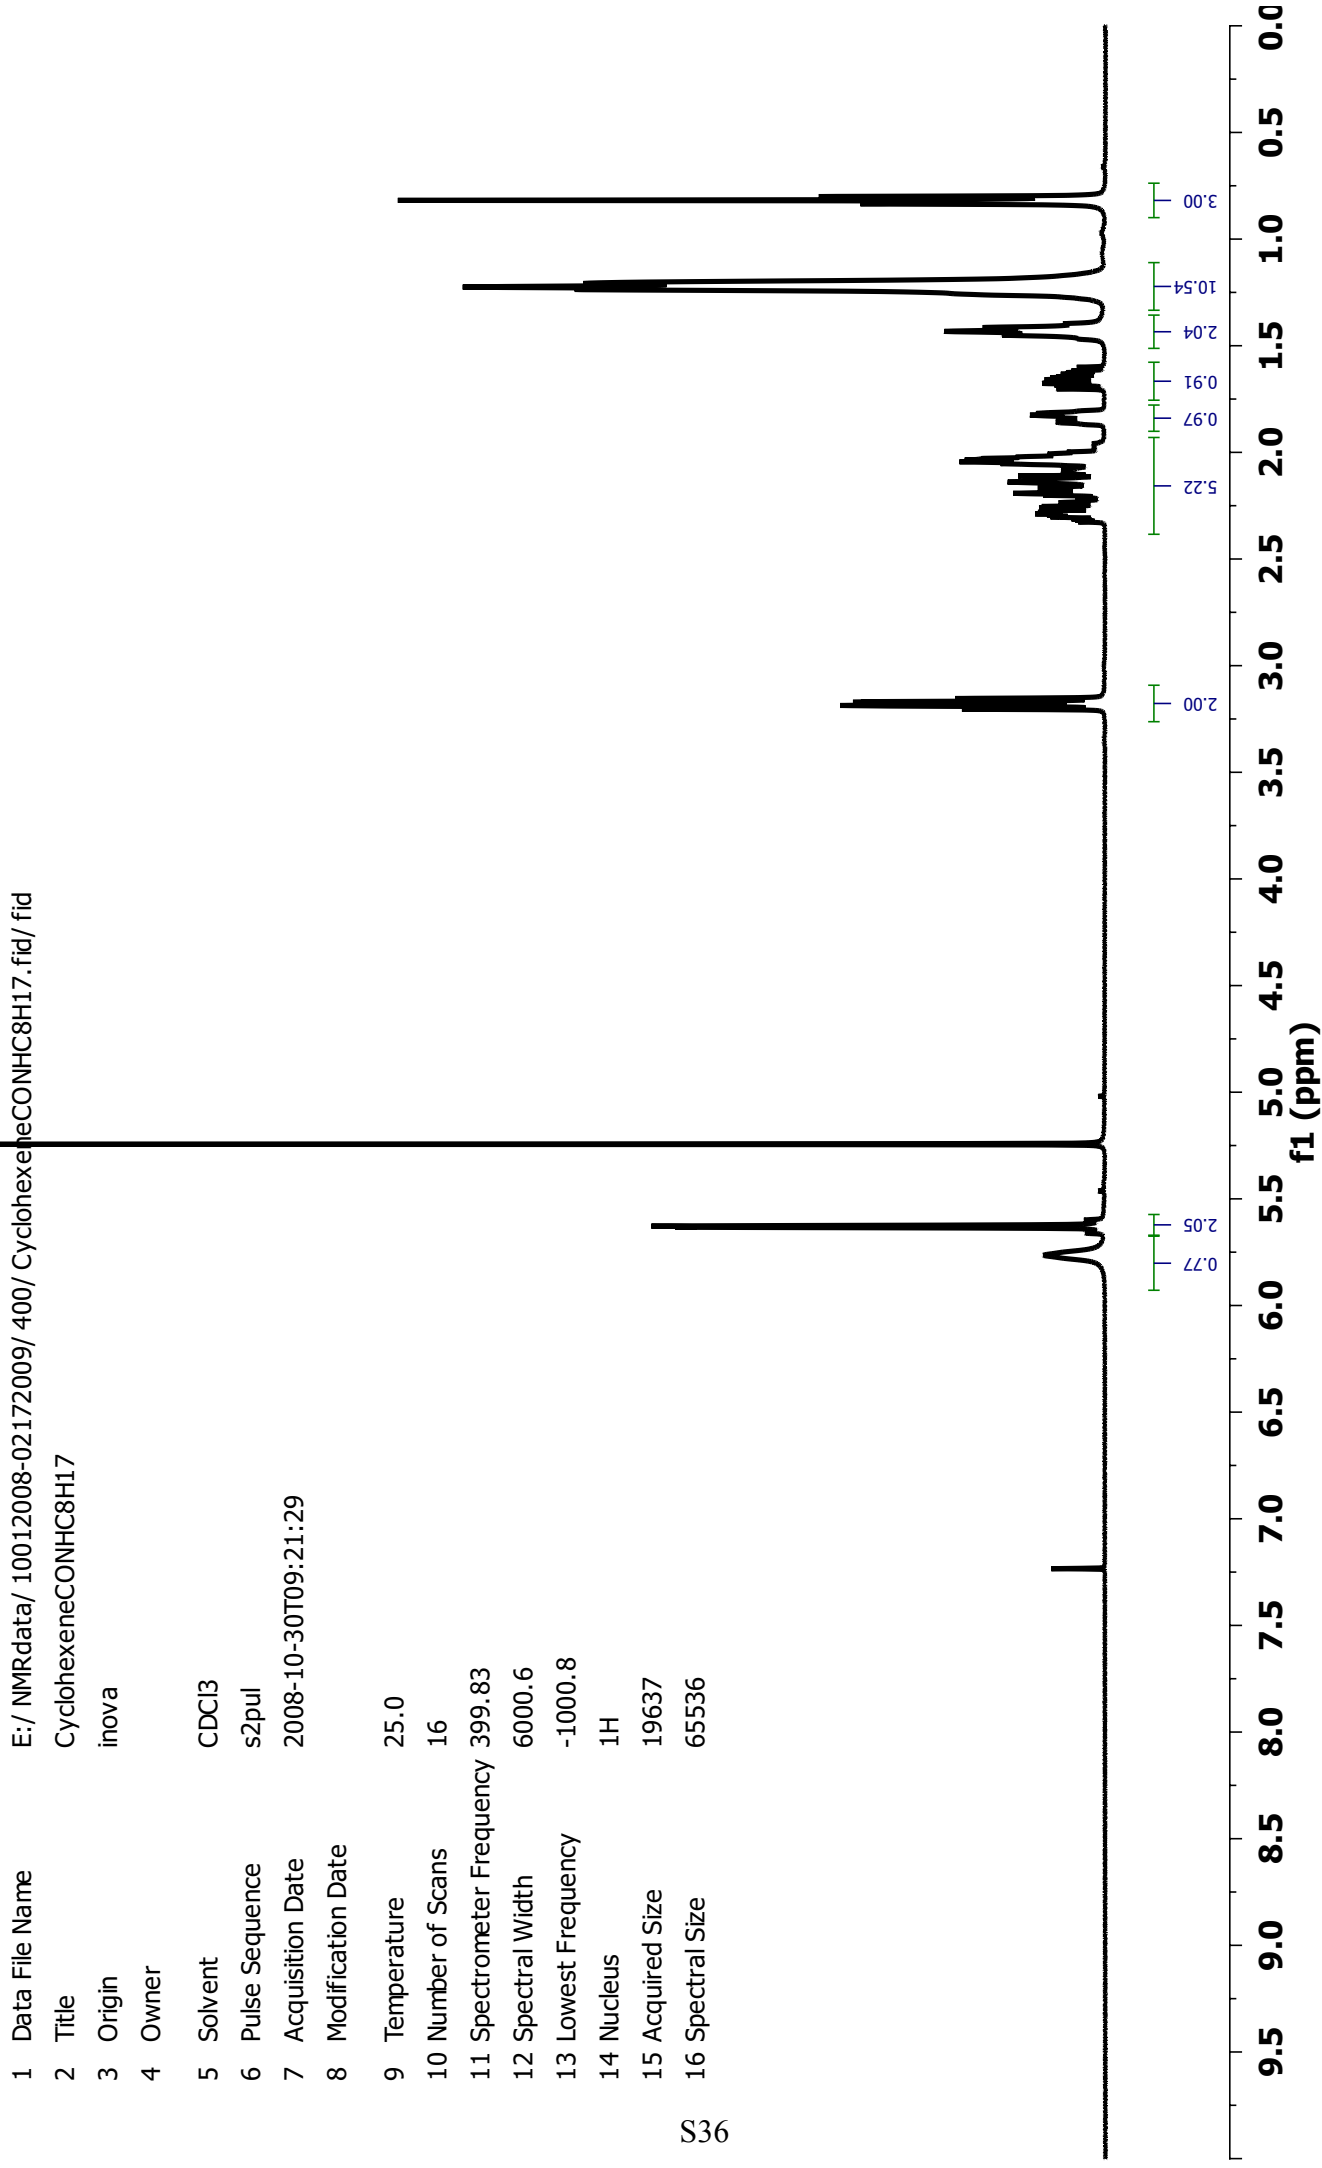

# <sup>1</sup>H-NMR spectrum of 18d

Parameter

|    |                        |                                                                            |
|----|------------------------|----------------------------------------------------------------------------|
| 1  | Data File Name         | E:/ NMRdata/ 10012008-02172009/ 400/ Cyclohexene-CONHC8H17-C13NMR.fid/ fid |
| 2  | Title                  | CyclohexenCONHC8H17-C13NMR                                                 |
| 3  | Origin                 | inova                                                                      |
| 4  | Owner                  |                                                                            |
| 5  | Solvent                | CDCl3                                                                      |
| 6  | Pulse Sequence         | s2pul                                                                      |
| 7  | Acquisition Date       | 2008-10-30T09:25:47                                                        |
| 8  | Modification Date      |                                                                            |
| 9  | Temperature            | 25.0                                                                       |
| 10 | Number of Scans        | 72                                                                         |
| 11 | Spectrometer Frequency | 100.55                                                                     |
| 12 | Spectral Width         | 25000.0                                                                    |
| 13 | Lowest Frequency       | -2990.6                                                                    |
| 14 | Nucleus                | 13C                                                                        |
| 15 | Acquired Size          | 29984                                                                      |
| 16 | Spectral Size          | 65536                                                                      |

Value

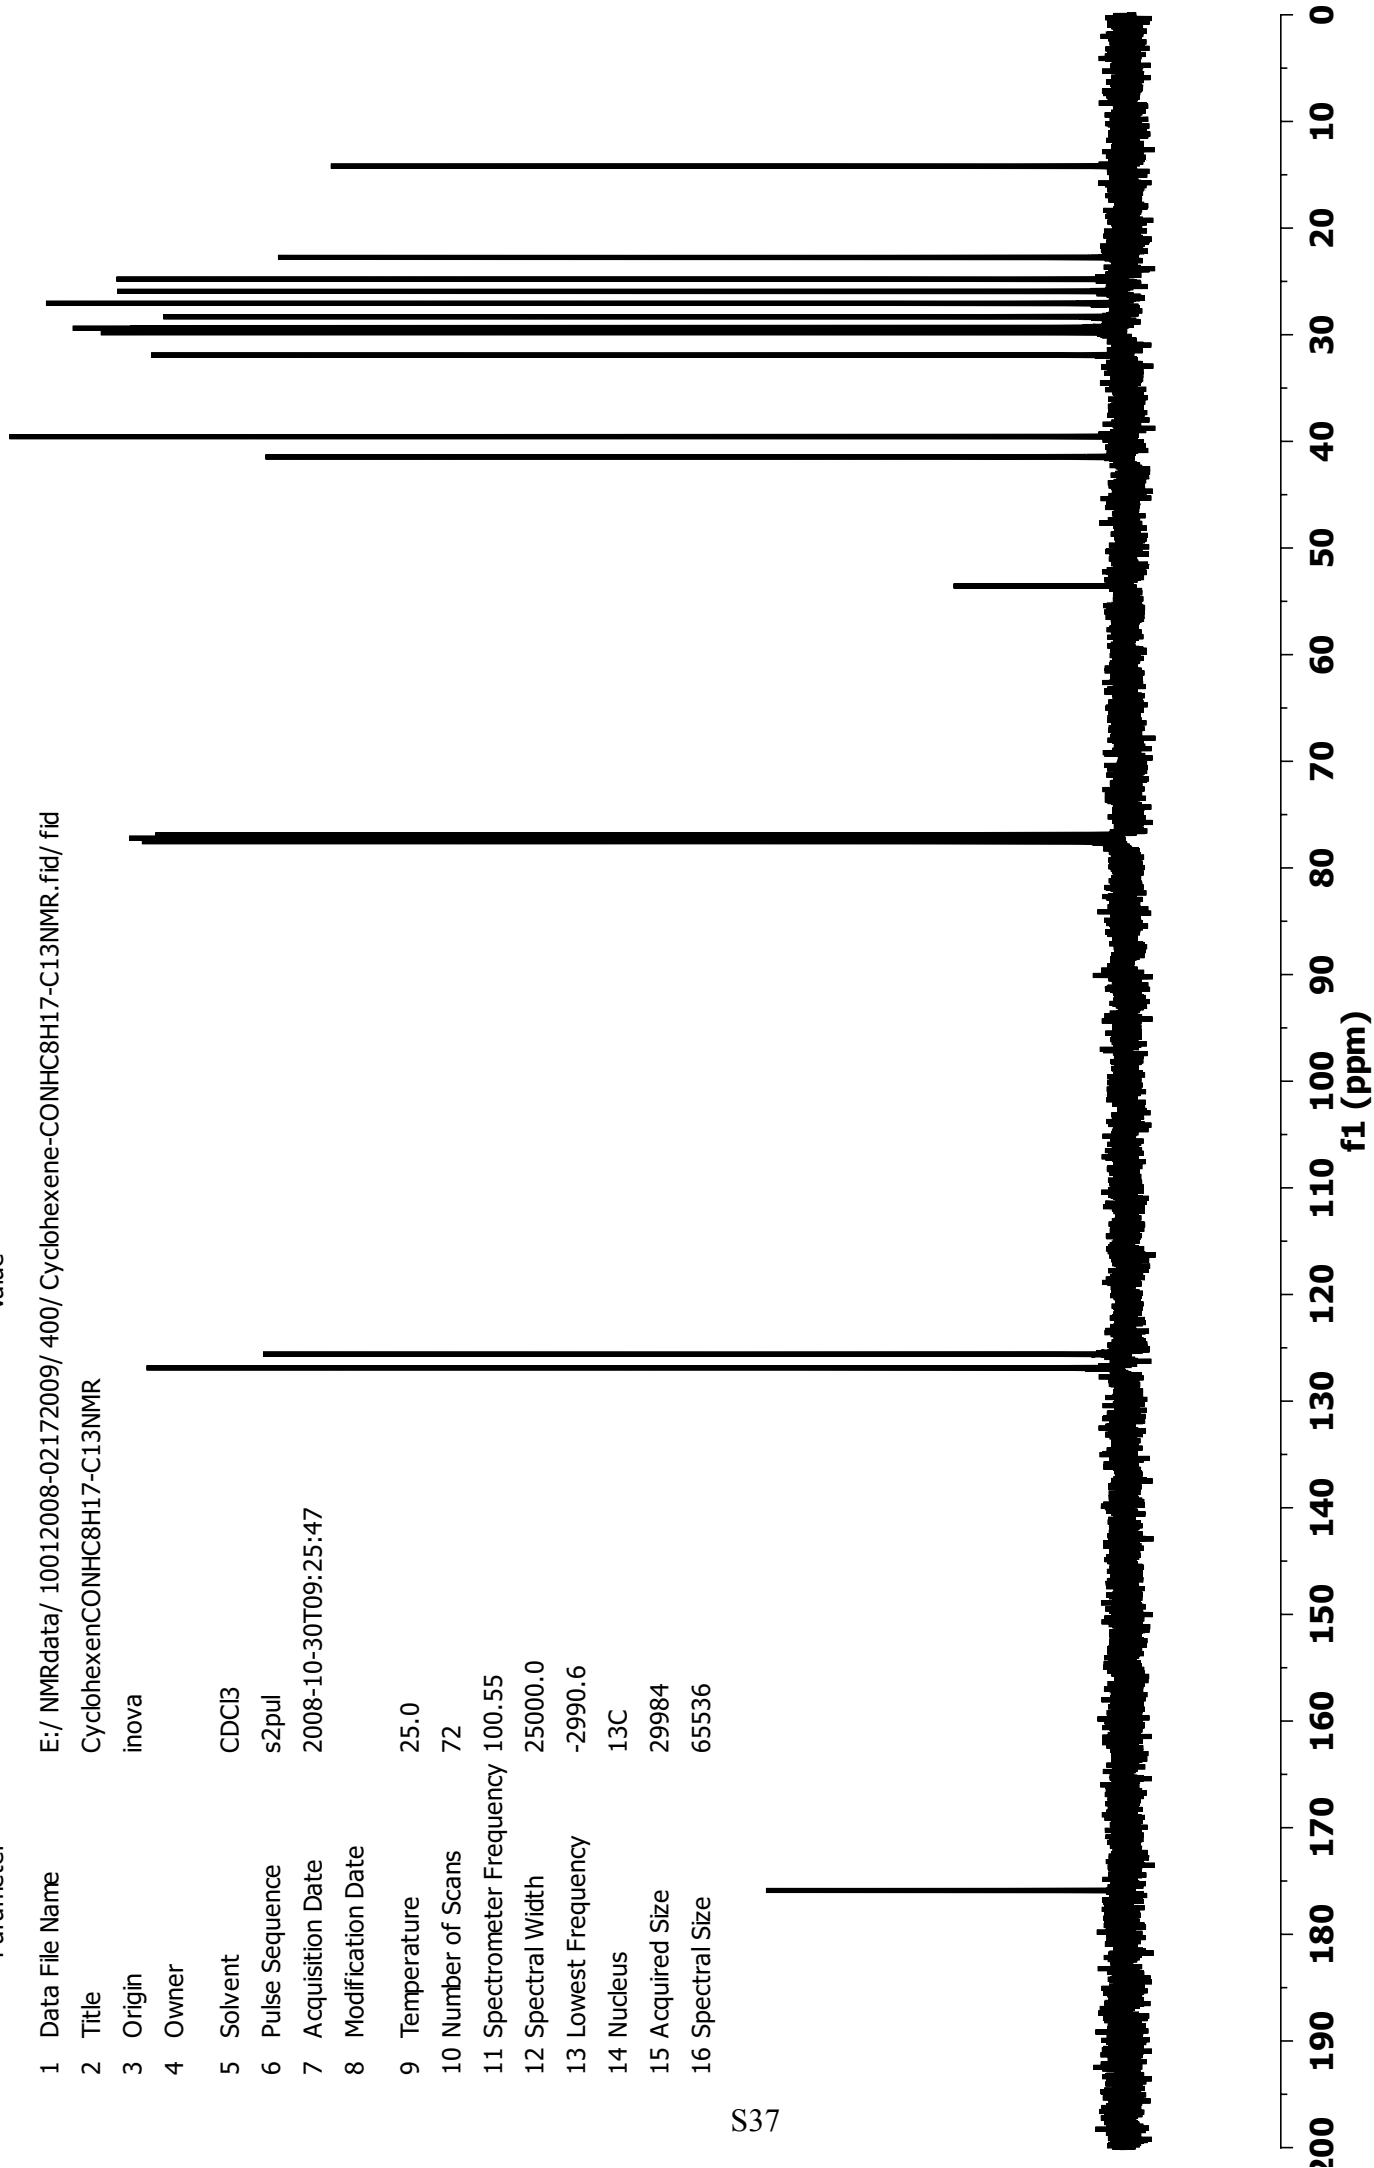

# <sup>13</sup>C-NMR spectrum of 18d

| Parameter                 | Value                                                          |
|---------------------------|----------------------------------------------------------------|
| 1 Data File Name          | E:/NMRdata/10012008-02172009/400/CBCONHC4H8CI11212008.fid/ fid |
| 2 Title                   | CBCONHC4H8CI11212008                                           |
| 3 Origin                  | inova                                                          |
| 4 Owner                   |                                                                |
| 5 Solvent                 | CDCl3                                                          |
| 6 Pulse Sequence          | s2pul                                                          |
| 7 Acquisition Date        | 2008-11-21T08:43:42                                            |
| 8 Modification Date       |                                                                |
| 9 Temperature             | 25.0                                                           |
| 10 Number of Scans        | 16                                                             |
| 11 Spectrometer Frequency | 399.83                                                         |
| 12 Spectral Width         | 6000.6                                                         |
| 13 Lowest Frequency       | -1000.8                                                        |
| 14 Nucleus                | 1H                                                             |
| 15 Acquired Size          | 19637                                                          |
| 16 Spectral Size          | 65536                                                          |

538

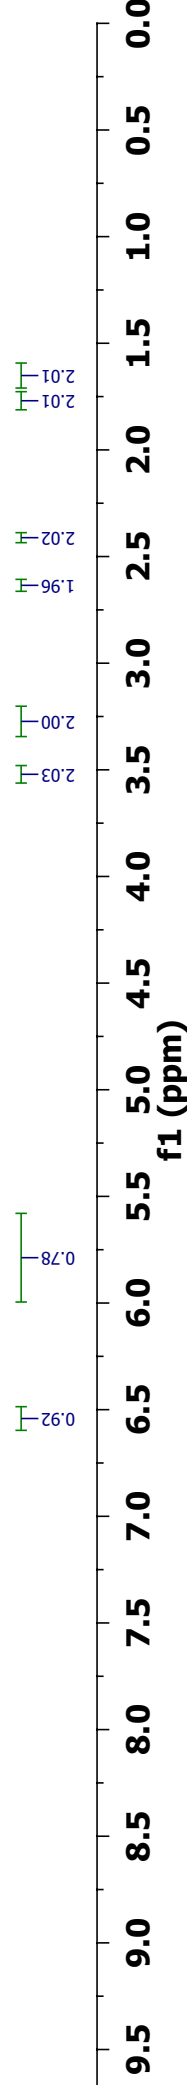

**<sup>1</sup>H-NMR spectrum of 19**

Value

Parameter

1 Data File Name E:/NMRdata/10012008-02172009/400/CBCONHC4H8Cl-C13NMR-111212008.fid/ fid  
2 Title CBCONHC4H8Cl-C13-NMR-111212008  
3 Origin inova  
4 Owner  
5 Solvent CDCl3  
6 Pulse Sequence s2pul  
7 Acquisition Date 2008-11-21T08:46:51  
8 Modification Date  
9 Temperature 25.0  
10 Number of Scans 136  
11 Spectrometer Frequency 100.55  
12 Spectral Width 25000.0  
13 Lowest Frequency -2989.3  
14 Nucleus 13C  
15 Acquired Size 29984  
16 Spectral Size 65536

S39

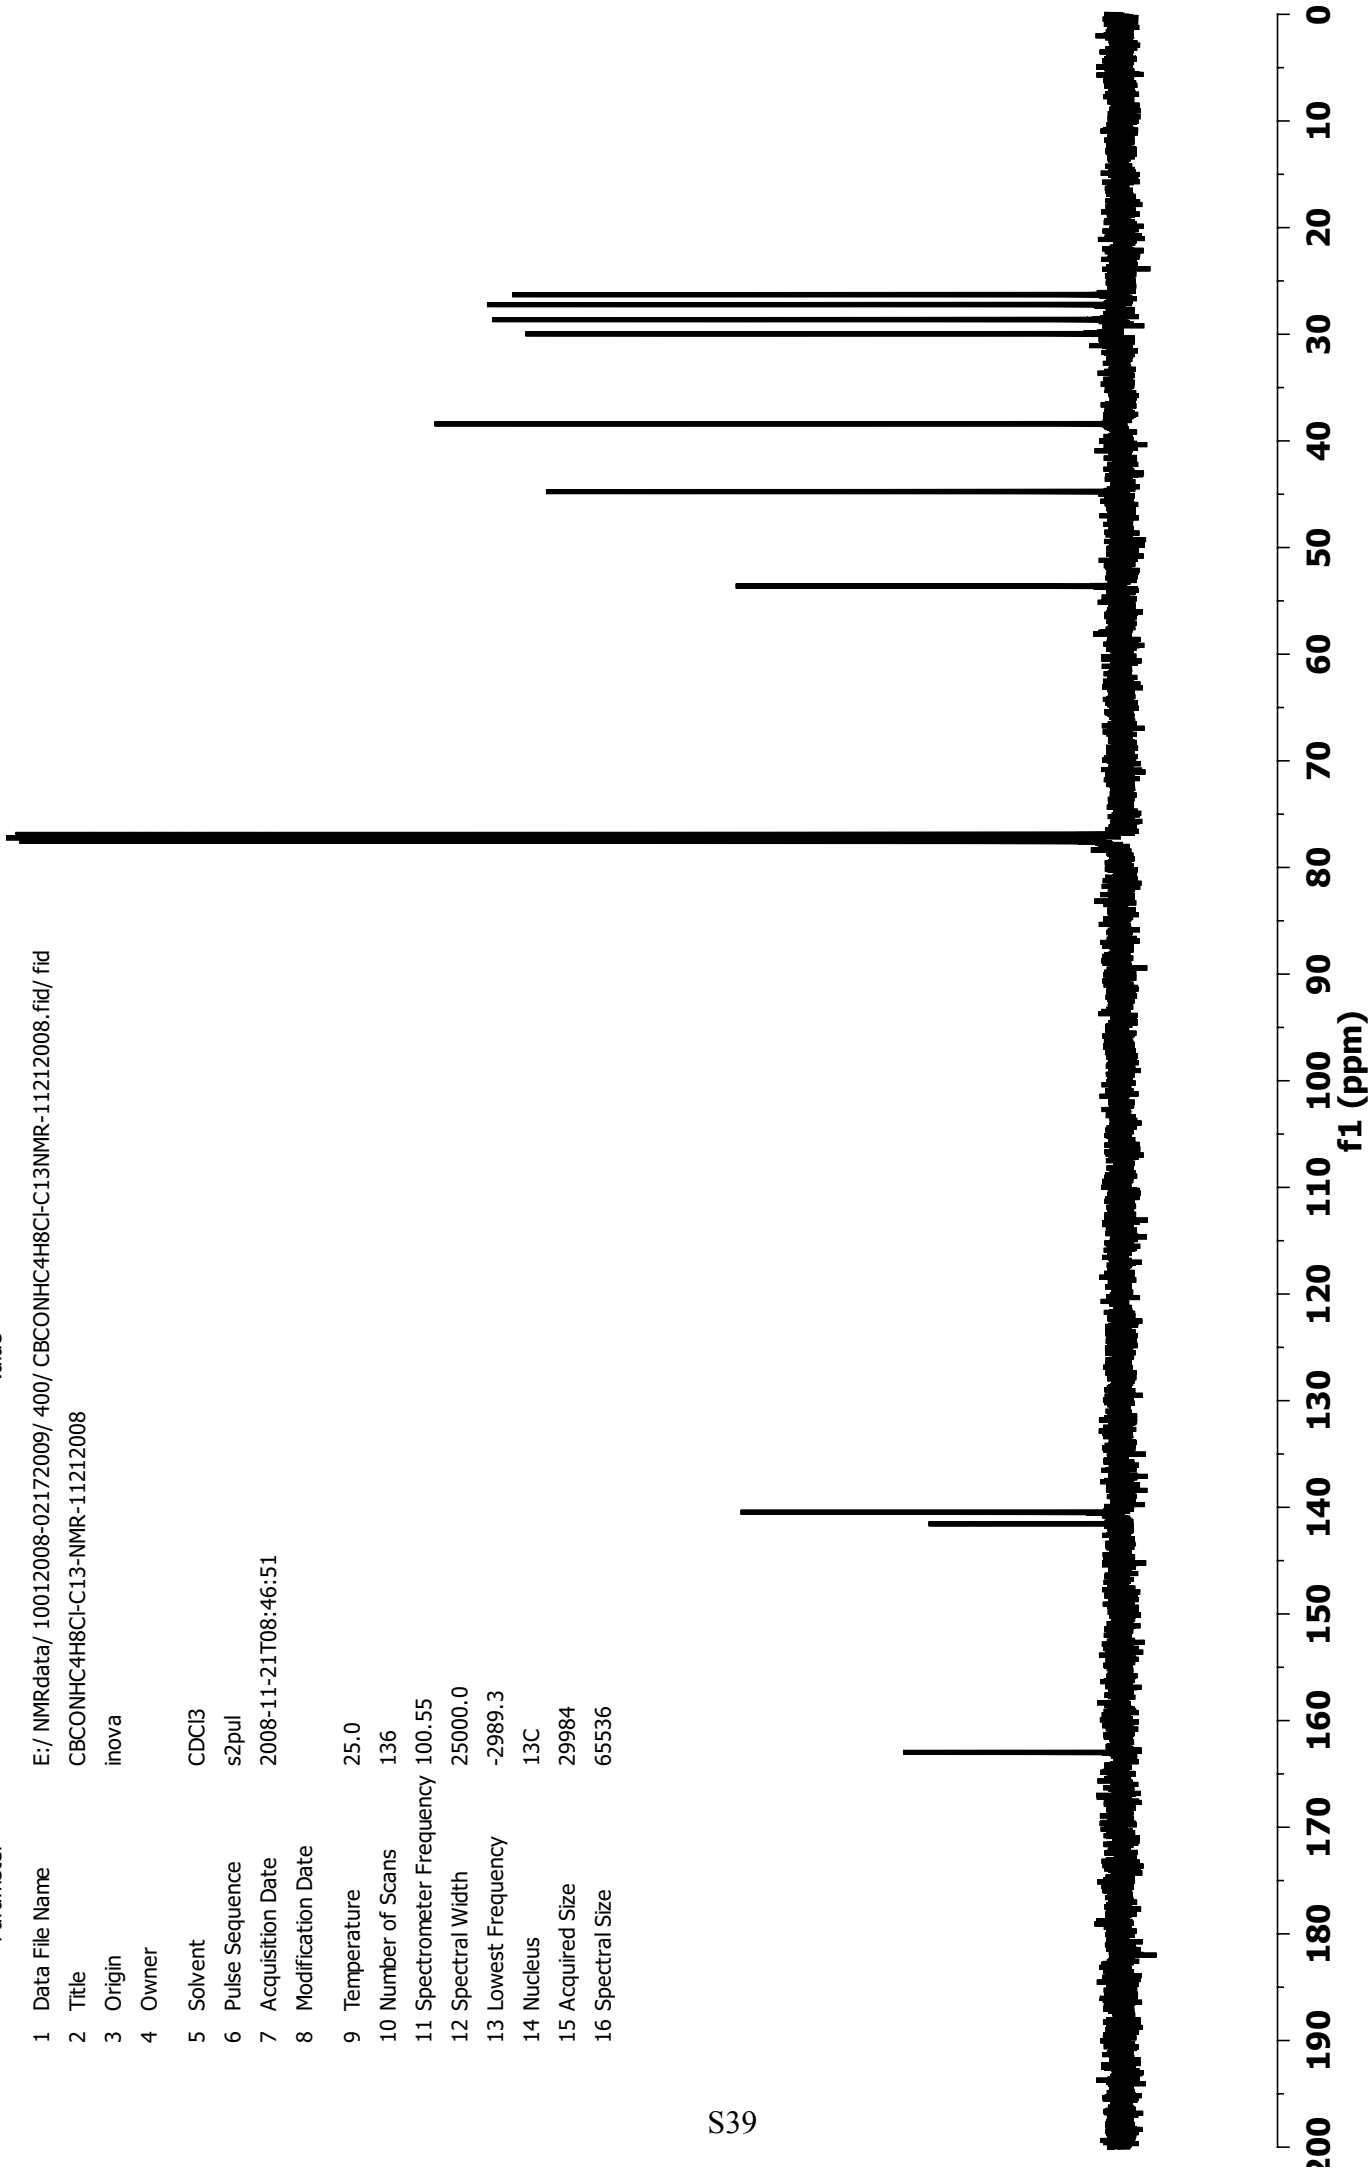

<sup>13</sup>C-NMR spectrum of 19

Parameter

Value

|    |                        |                                                                          |
|----|------------------------|--------------------------------------------------------------------------|
| 1  | Data File Name         | E:/ NMRdata/ 12122009-01262010/ 500/ 1-bromocyclooctene01132010.fid/ fid |
| 2  | Title                  | 5-bromocyclooctene                                                       |
| 3  | Origin                 | inova                                                                    |
| 4  | Owner                  |                                                                          |
| 5  | Solvent                | CDC13                                                                    |
| 6  | Pulse Sequence         | s2pul                                                                    |
| 7  | Acquisition Date       | 2010-01-13T10:22:25                                                      |
| 8  | Modification Date      |                                                                          |
| 9  | Temperature            | 25.0                                                                     |
| 10 | Number of Scans        | 88                                                                       |
| 11 | Spectrometer Frequency | 499.90                                                                   |
| 12 | Spectral Width         | 8003.2                                                                   |
| 13 | Lowest Frequency       | -1002.3                                                                  |
| 14 | Nucleus                | <sup>1</sup> H                                                           |
| 15 | Acquired Size          | 15136                                                                    |
| 16 | Spectral Size          | 32768                                                                    |

S40

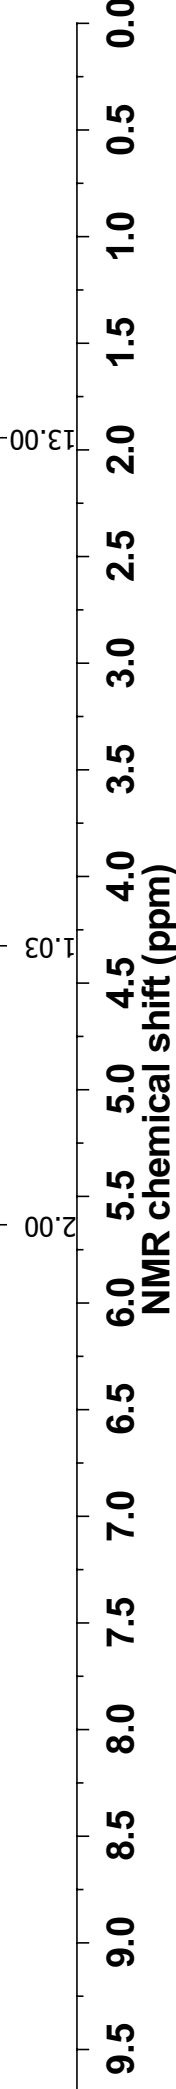

**<sup>1</sup>H-NMR spectrum of 21**



| Parameter                 | Value                                                                    |
|---------------------------|--------------------------------------------------------------------------|
| 1 Data File Name          | E:/ NMRdata/ 12122009-01262010/ 500/ 1-bromocyclooctene01132010.fid/ fid |
| 2 Title                   | 5-bromocyclooctene                                                       |
| 3 Origin                  | inova                                                                    |
| 4 Owner                   |                                                                          |
| 5 Solvent                 | CDCl3                                                                    |
| 6 Pulse Sequence          | s2pul                                                                    |
| 7 Acquisition Date        | 2010-01-13T10:22:25                                                      |
| 8 Modification Date       |                                                                          |
| 9 Temperature             | 25.0                                                                     |
| 10 Number of Scans        | 88                                                                       |
| 11 Spectrometer Frequency | 499.90                                                                   |
| 12 Spectral Width         | 8003.2                                                                   |
| 13 Lowest Frequency       | -1002.3                                                                  |
| 14 Nucleus                | <sup>1</sup> H                                                           |
| 15 Acquired Size          | 15136                                                                    |
| 16 Spectral Size          | 32768                                                                    |

54

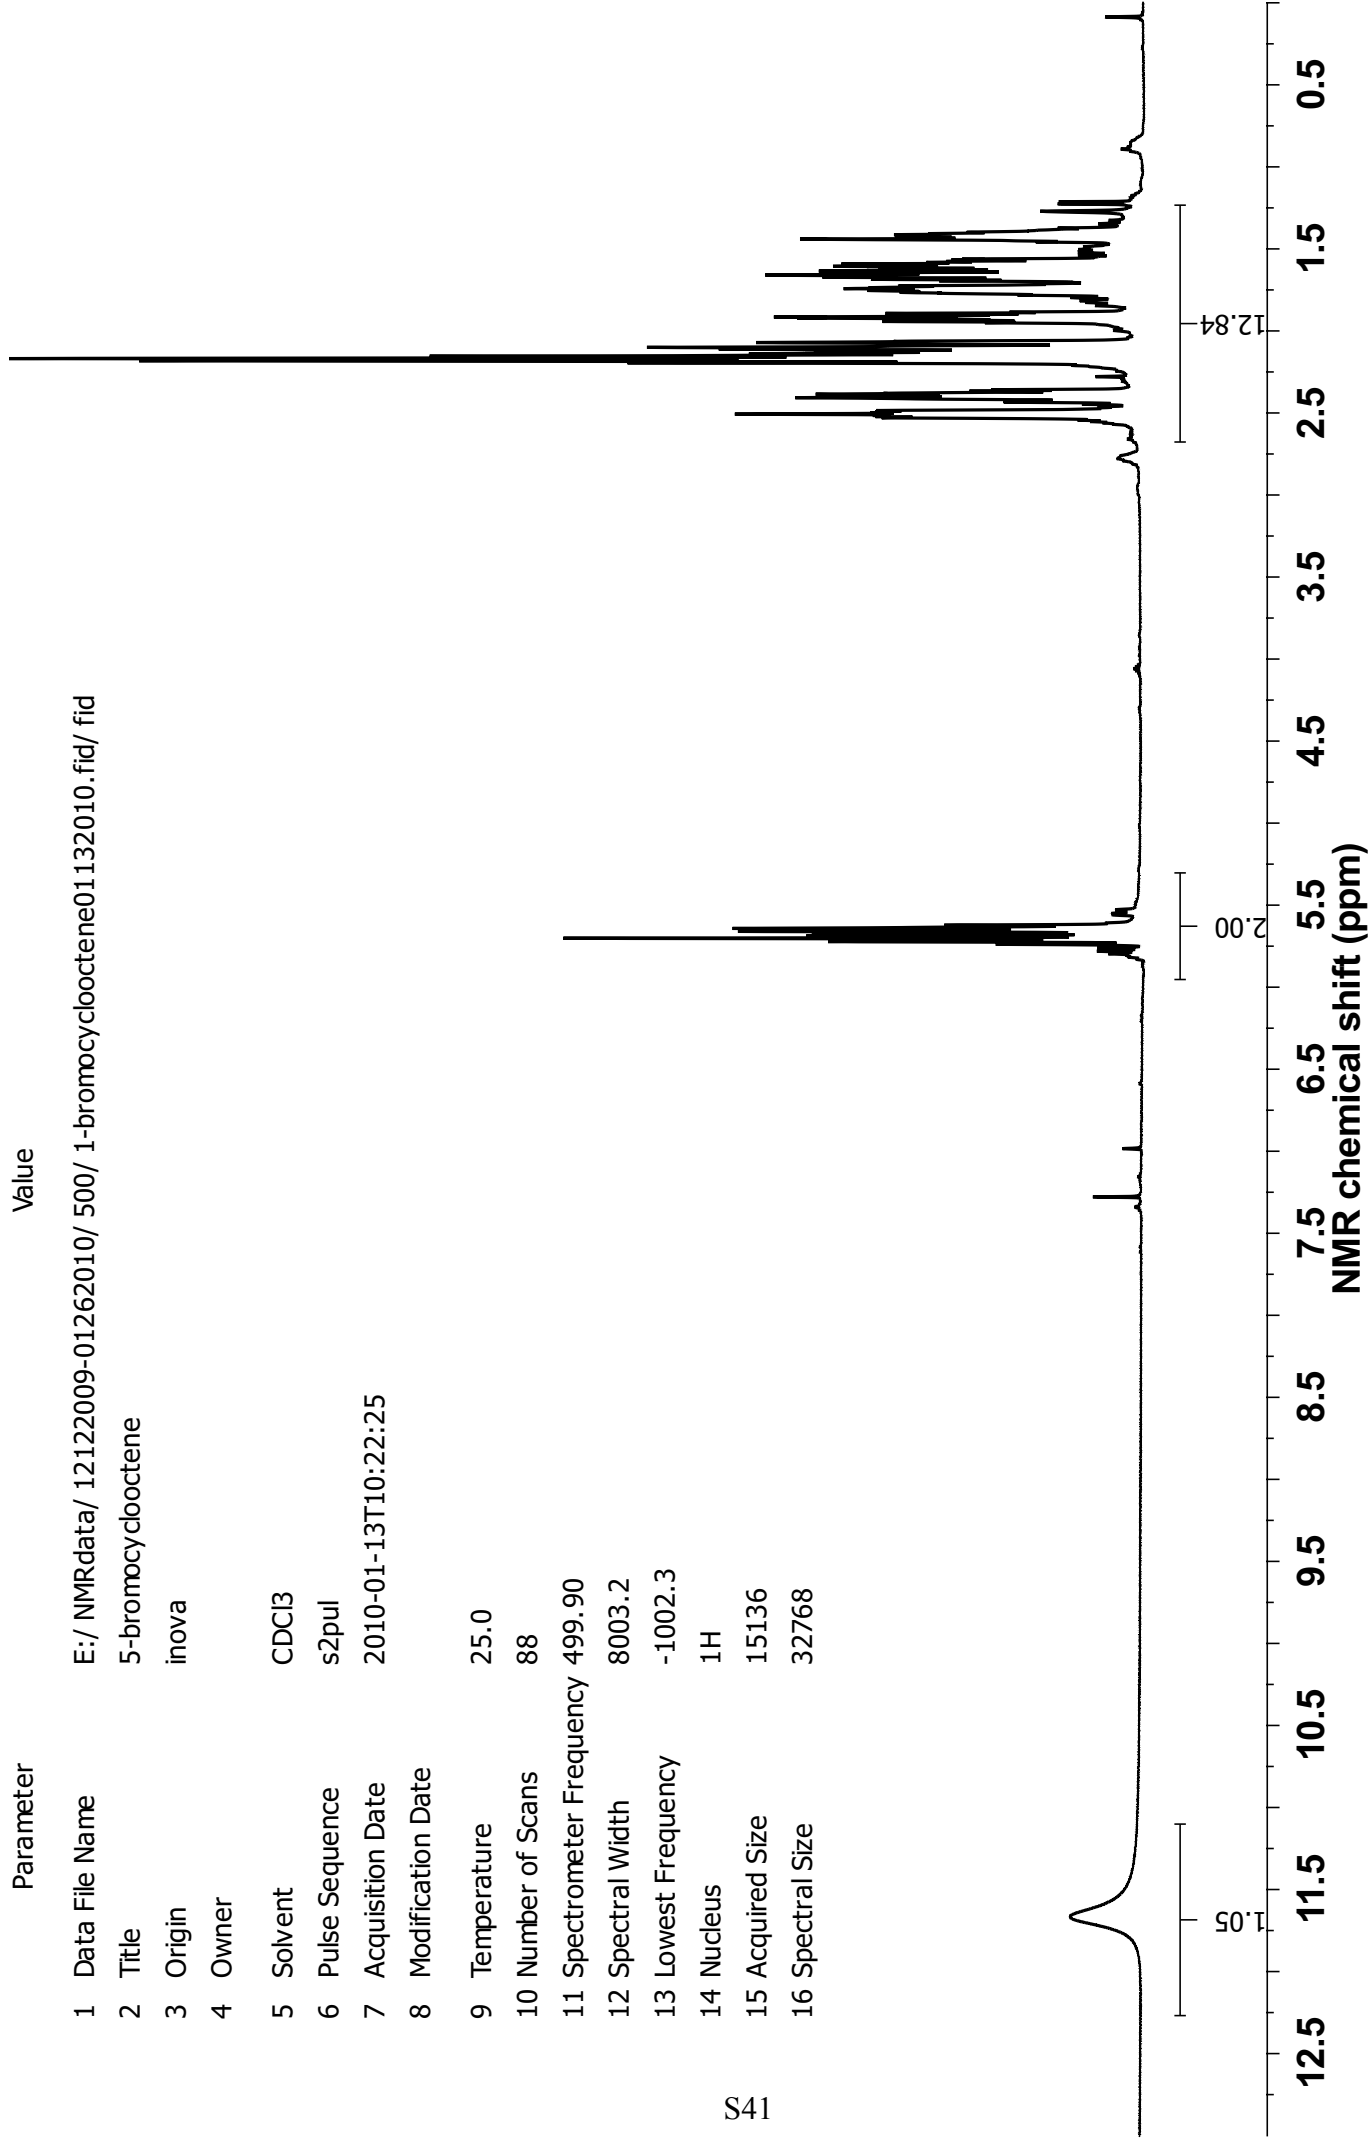

**<sup>1</sup>H-NMR spectrum of 22**

Value

Parameter

|    |                        |                                                                                |
|----|------------------------|--------------------------------------------------------------------------------|
| 1  | Data File Name         | E:/ NMRdata/ 12122009-01262010/ 500/ 5-CycloocteneCOOH-C13NMR01222010.fid/ fid |
| 2  | Title                  | 5-cycloocteneCOOH-C13NMR                                                       |
| 3  | Origin                 | inova                                                                          |
| 4  | Owner                  |                                                                                |
| 5  | Solvent                | CDCl3                                                                          |
| 6  | Pulse Sequence         | s2pul                                                                          |
| 7  | Acquisition Date       | 2010-01-21T06:18:39                                                            |
| 8  | Modification Date      |                                                                                |
| 9  | Temperature            | 25.0                                                                           |
| 10 | Number of Scans        | 128                                                                            |
| 11 | Spectrometer Frequency | 125.71                                                                         |
| 12 | Spectral Width         | 31446.5                                                                        |
| 13 | Lowest Frequency       | -2210.1                                                                        |
| 14 | Nucleus                | 13C                                                                            |
| 15 | Acquired Size          | 40896                                                                          |
| 16 | Spectral Size          | 131072                                                                         |

54

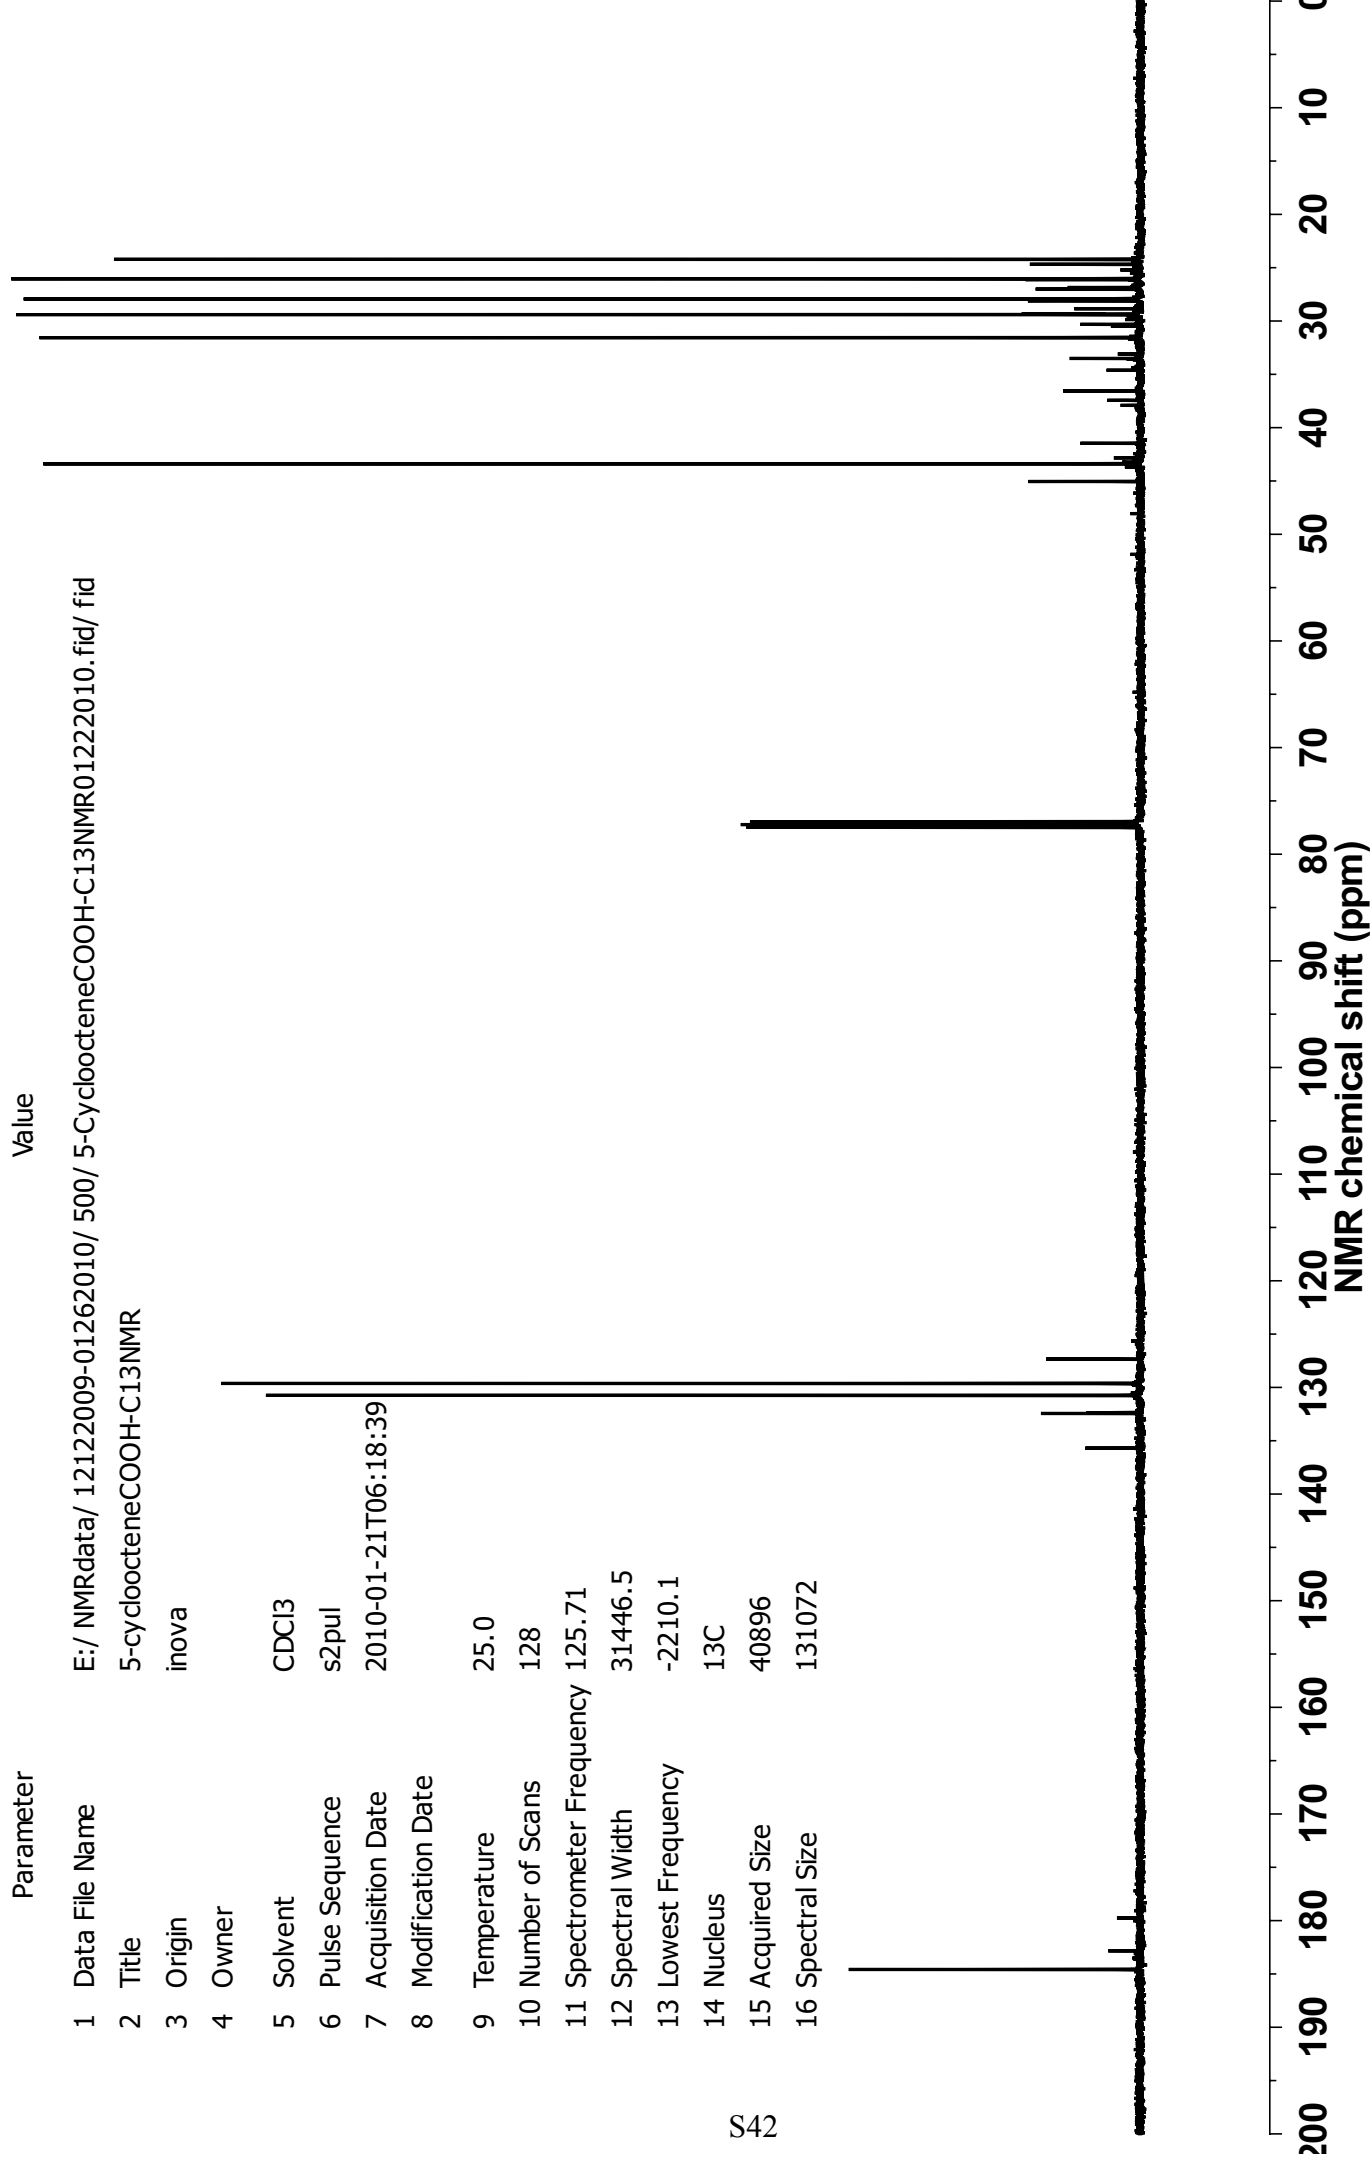

## <sup>13</sup>C-NMR spectrum of 22

| Parameter                 | Value                                                                         |
|---------------------------|-------------------------------------------------------------------------------|
| 1 Data File Name          | E:/ NMRdata/ 12122009-01262010/ 500/ 5-cycloocteneCOOC4H8Cl-01232010.fid/ fid |
| 2 Title                   | STANDARD PROTON PARAMETERS                                                    |
| 3 Origin                  | inova                                                                         |
| 4 Owner                   |                                                                               |
| 5 Solvent                 | CDCl3                                                                         |
| 6 Pulse Sequence          | s2pul                                                                         |
| 7 Acquisition Date        | 2010-01-22T06:29:42                                                           |
| 8 Modification Date       |                                                                               |
| 9 Temperature             | 25.0                                                                          |
| 10 Number of Scans        | 40                                                                            |
| 11 Spectrometer Frequency | 499.90                                                                        |
| 12 Spectral Width         | 8003.2                                                                        |
| 13 Lowest Frequency       | -1002.3                                                                       |
| 14 Nucleus                | 1H                                                                            |
| 15 Acquired Size          | 15136                                                                         |
| 16 Spectral Size          | 32768                                                                         |

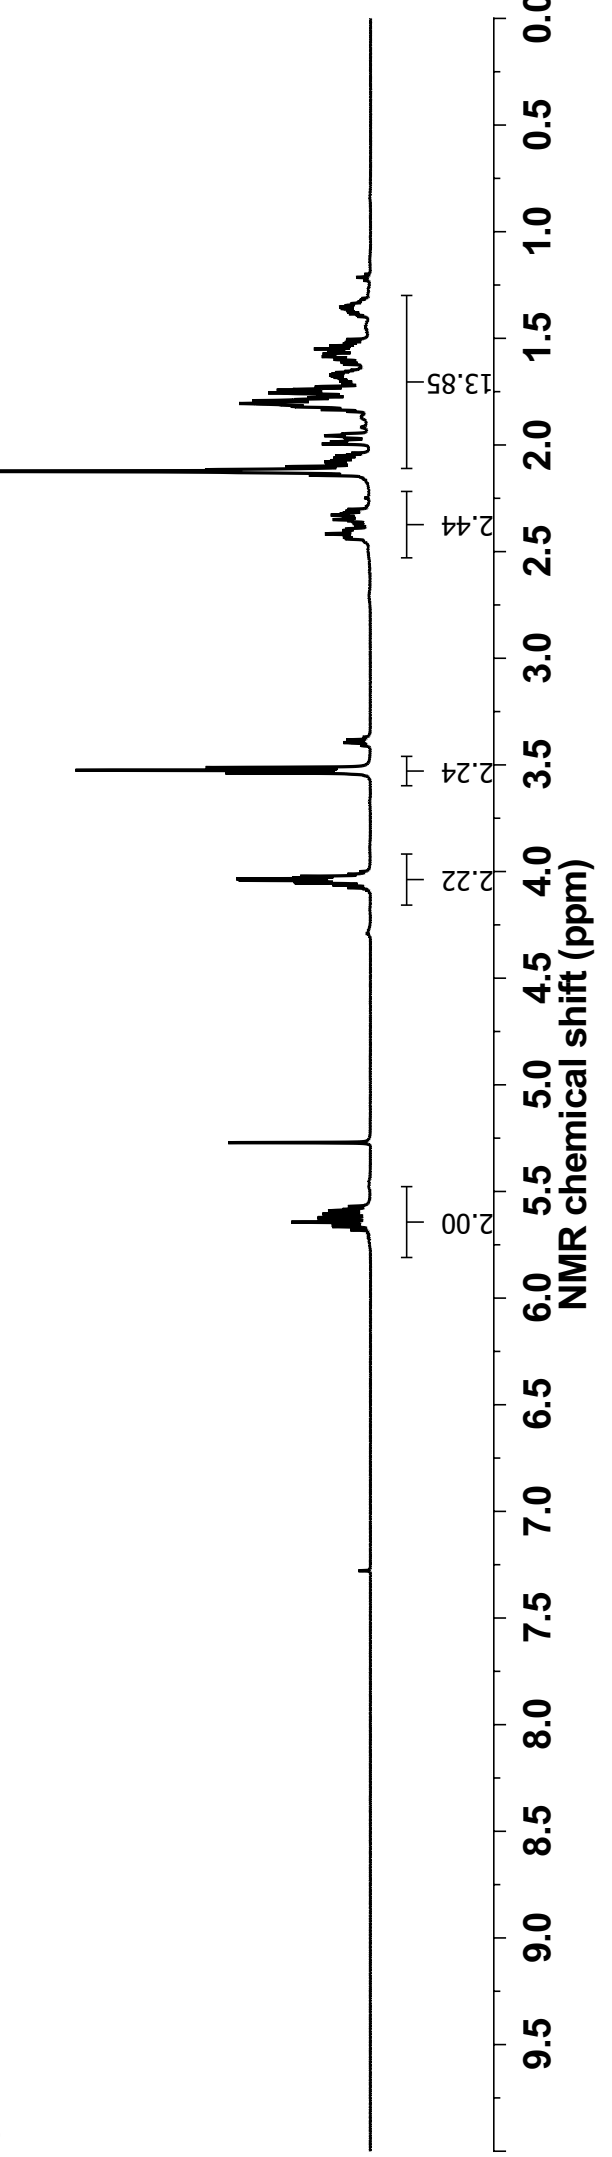

**<sup>1</sup>H-NMR spectrum of 20**

Value

Parameter

|    |                        |                                                                                     |
|----|------------------------|-------------------------------------------------------------------------------------|
| 1  | Data File Name         | E:/ NMRdata/ 12122009-01262010/ 500/ 5-cycloocteneCOOC4H8Cl-C13NMR01232010.fid/ fid |
| 2  | Title                  | 5-cycloocteneCOOC4H8Cl-C13NMR                                                       |
| 3  | Origin                 | inova                                                                               |
| 4  | Owner                  |                                                                                     |
| 5  | Solvent                | CDCI3                                                                               |
| 6  | Pulse Sequence         | s2pul                                                                               |
| 7  | Acquisition Date       | 2010-01-22T06:34:13                                                                 |
| 8  | Modification Date      |                                                                                     |
| 9  | Temperature            | 25.0                                                                                |
| 10 | Number of Scans        | 184                                                                                 |
| 11 | Spectrometer Frequency | 125.71                                                                              |
| 12 | Spectral Width         | 31446.5                                                                             |
| 13 | Lowest Frequency       | -2218.6                                                                             |
| 14 | Nucleus                | 13C                                                                                 |
| 15 | Acquired Size          | 40896                                                                               |
| 16 | Spectral Size          | 131072                                                                              |

S44

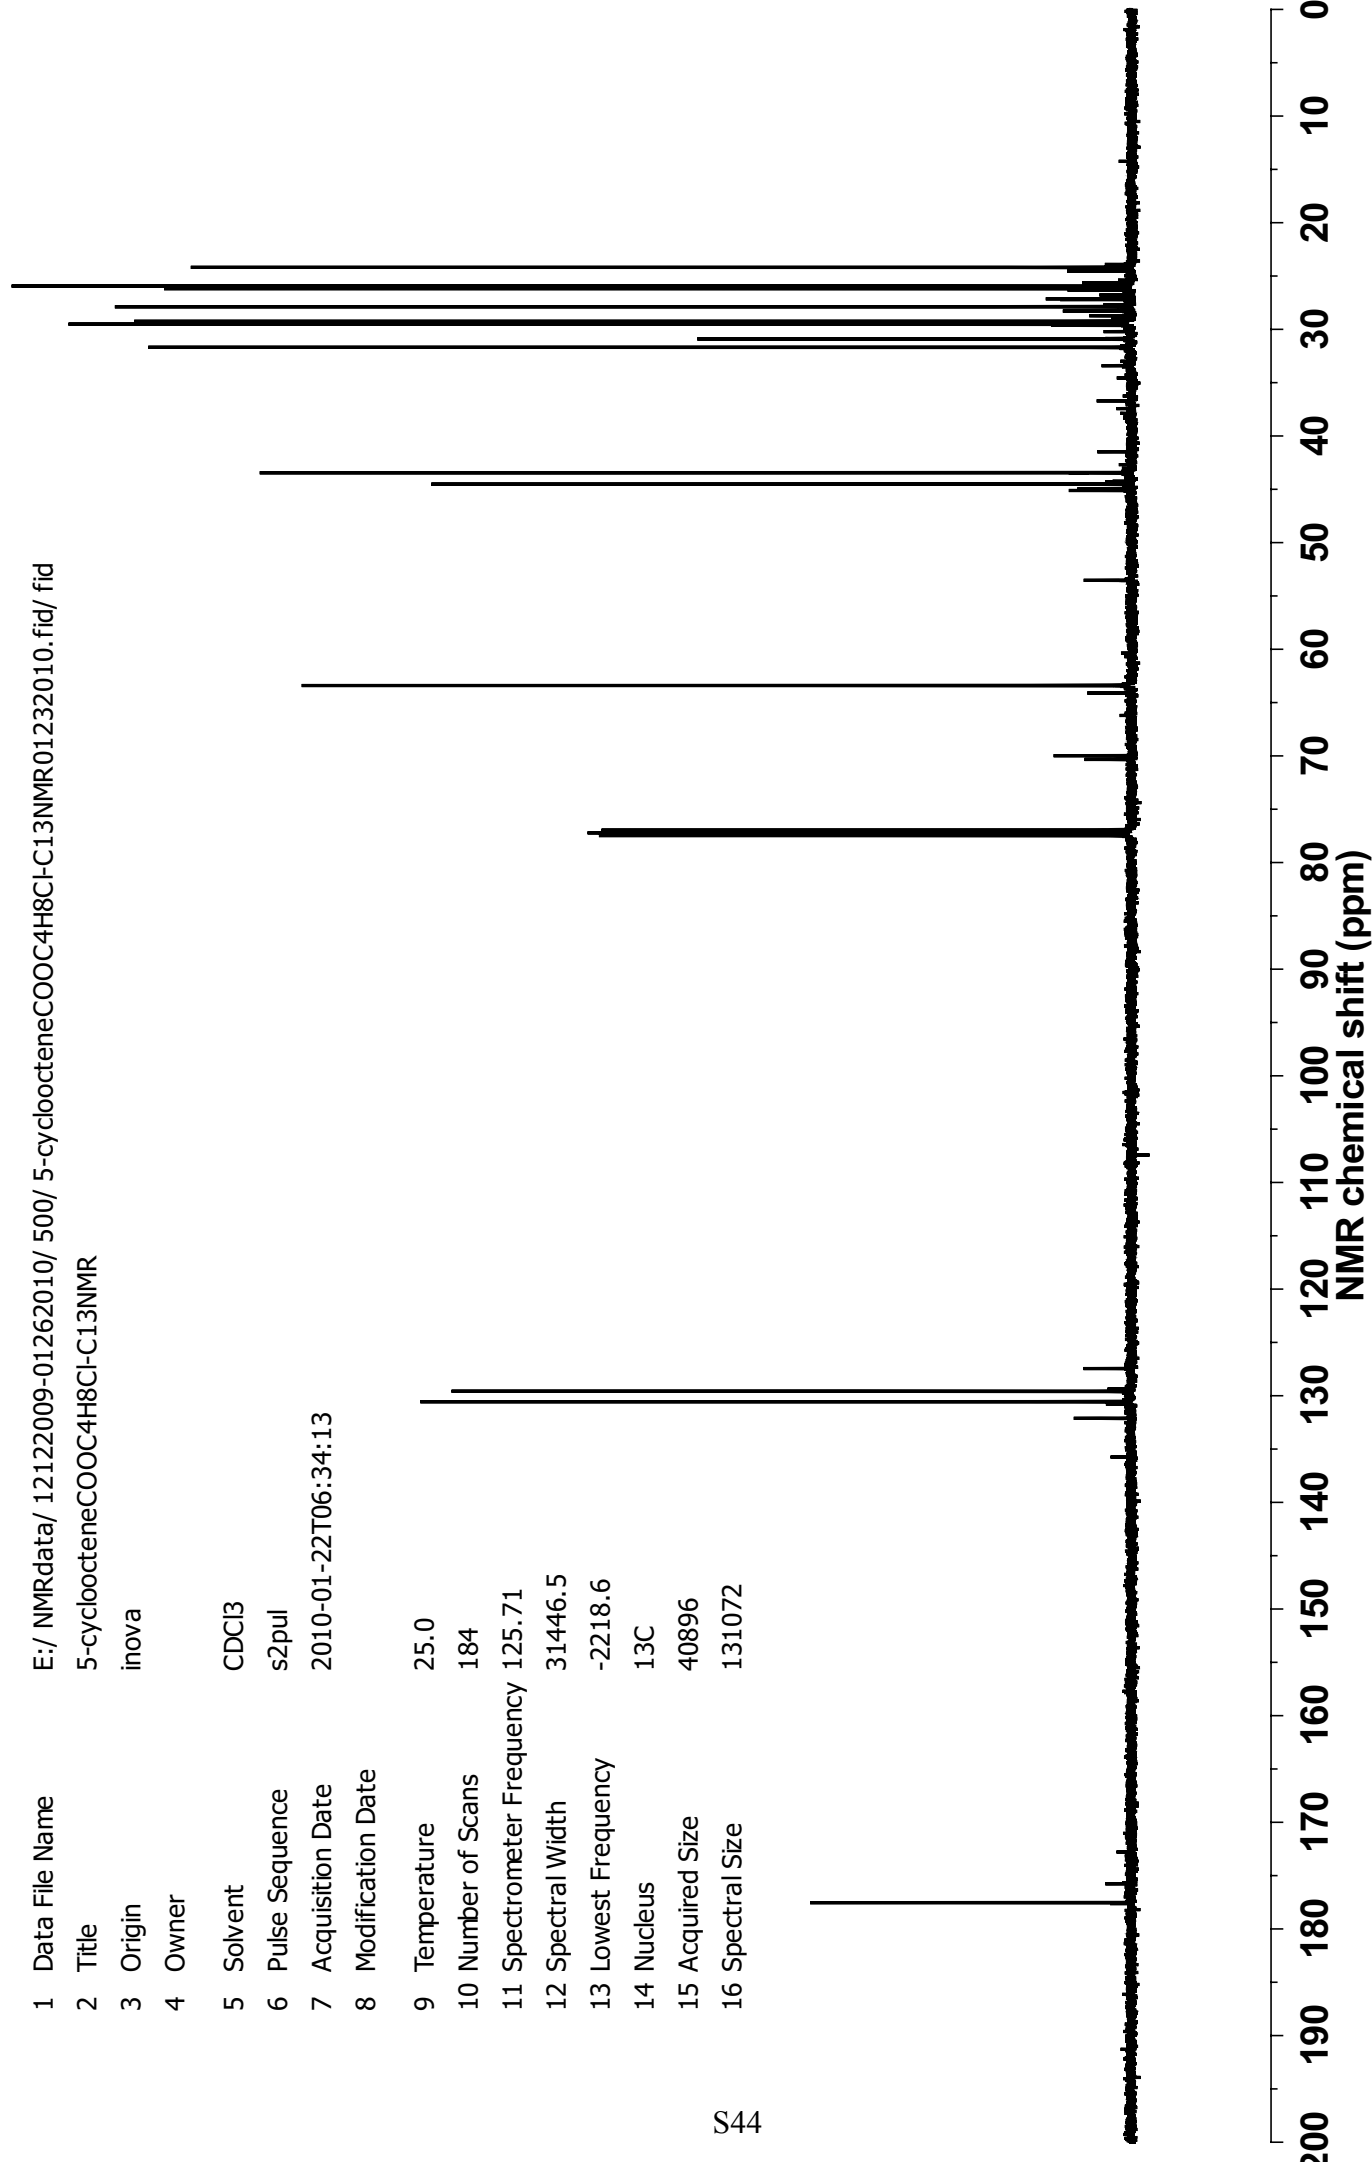

**<sup>13</sup>C-NMR spectrum of 20**

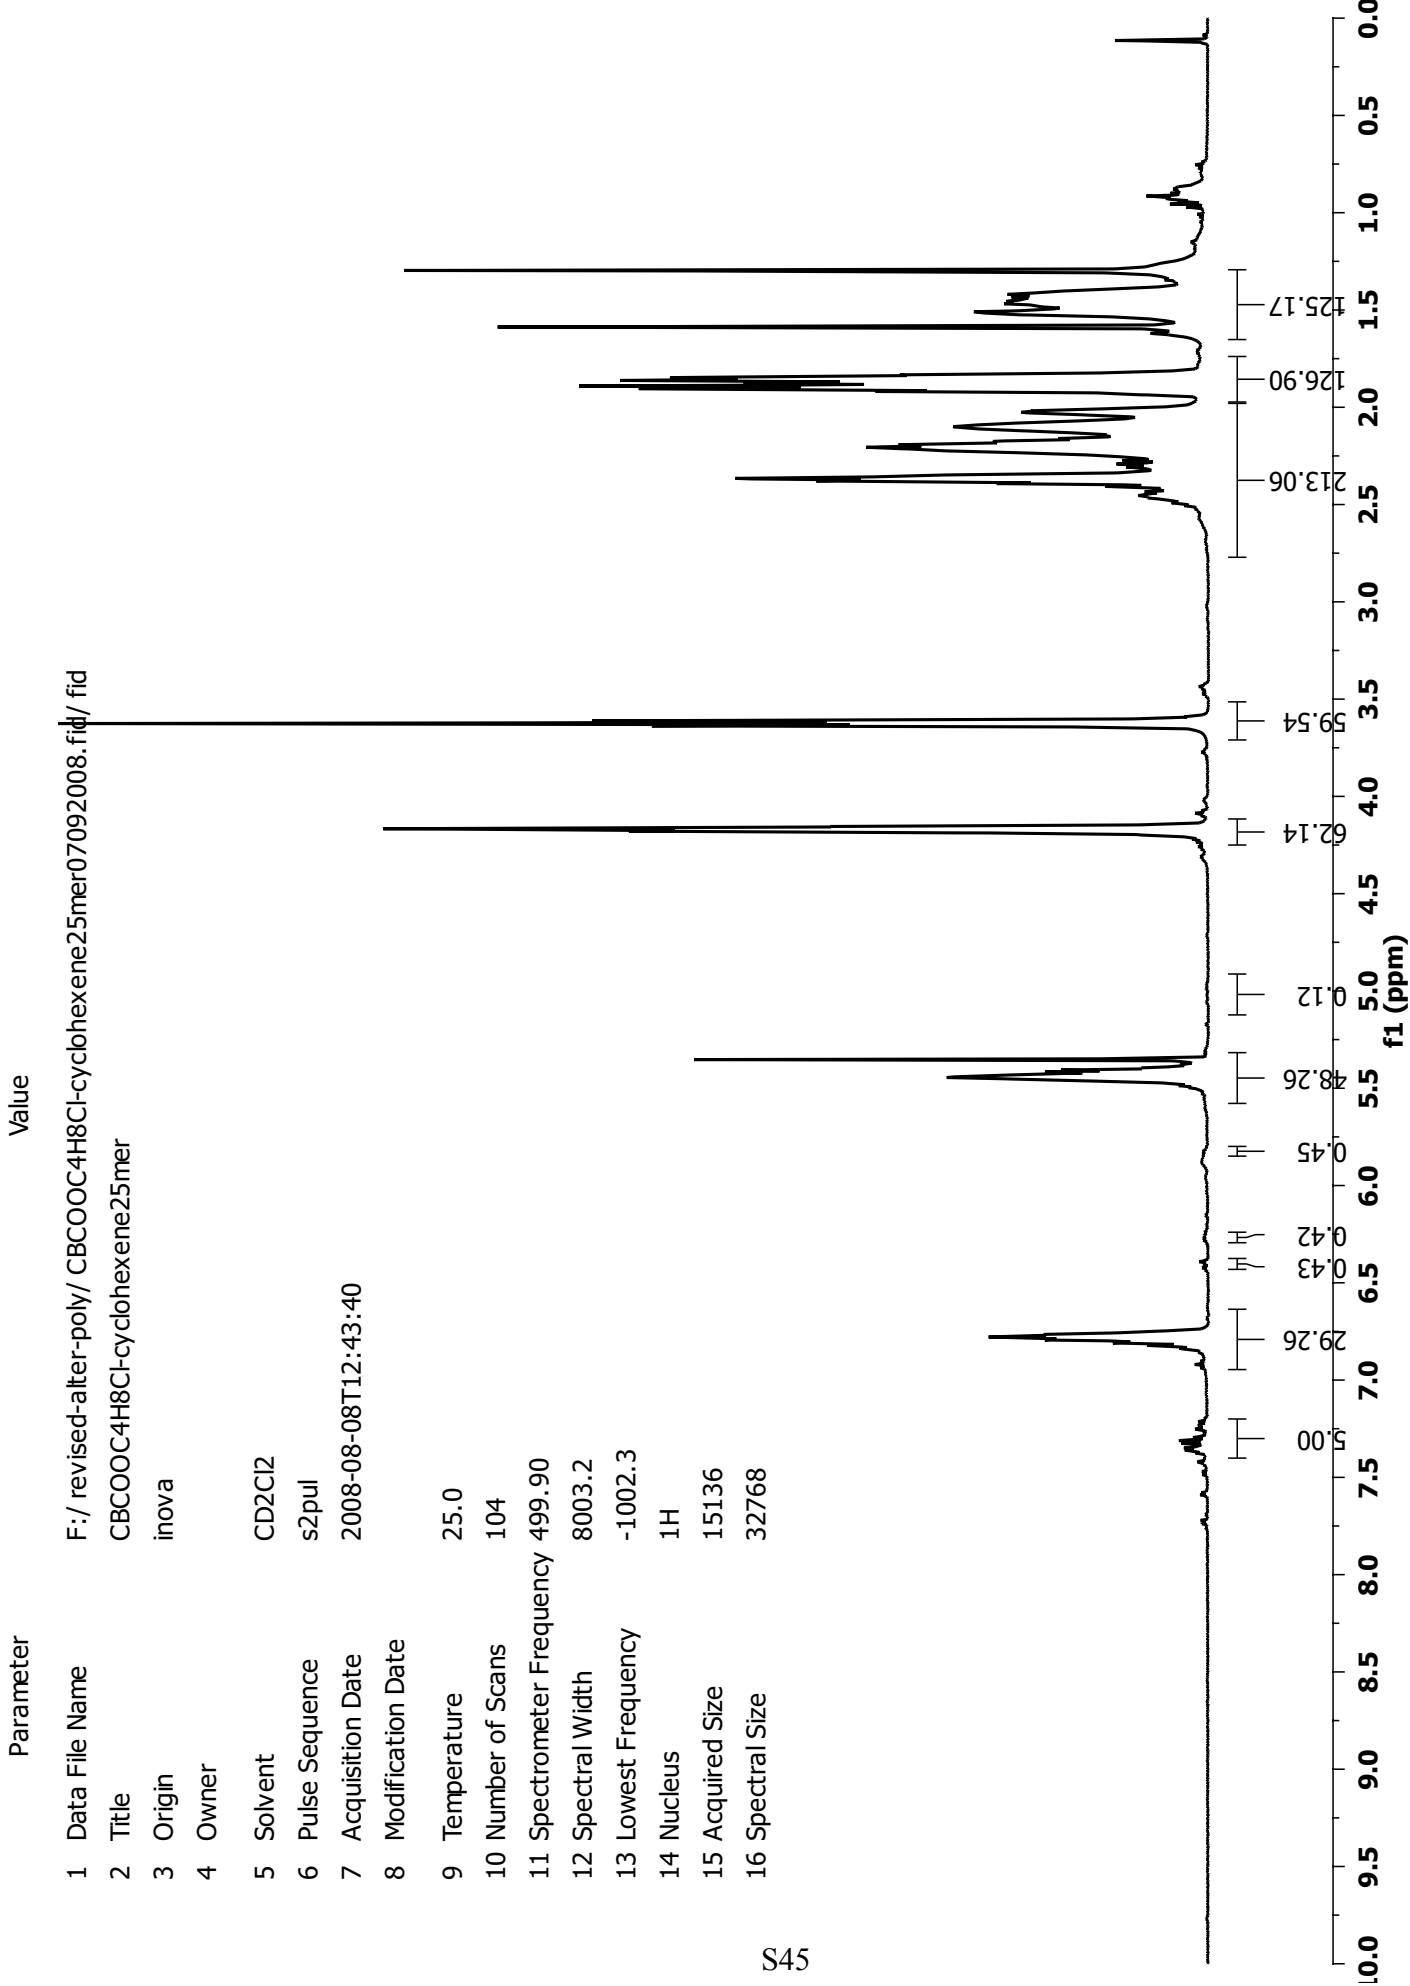

# <sup>1</sup>H-NMR spectrum of Intermediate-1

| Parameter                 | Value                                                                     |
|---------------------------|---------------------------------------------------------------------------|
| 1 Data File Name          | E:/ NMRdata/ 12122009-01262010/ 500/ Prepolymer-1-C13NMR01252010.fid/ fid |
| 2 Title                   | STANDARD CARBON PARAMETERS                                                |
| 3 Origin                  | inova                                                                     |
| 4 Owner                   |                                                                           |
| 5 Solvent                 | CDCl3                                                                     |
| 6 Pulse Sequence          | s2pul                                                                     |
| 7 Acquisition Date        | 2010-01-24T09:31:56                                                       |
| 8 Modification Date       |                                                                           |
| 9 Temperature             | 25.0                                                                      |
| 10 Number of Scans        | 31092                                                                     |
| 11 Spectrometer Frequency | 125.71                                                                    |
| 12 Spectral Width         | 31446.5                                                                   |
| 13 Lowest Frequency       | -2199.2                                                                   |
| 14 Nucleus                | <sup>13</sup> C                                                           |
| 15 Acquired Size          | 40896                                                                     |
| 16 Spectral Size          | 131072                                                                    |

S46

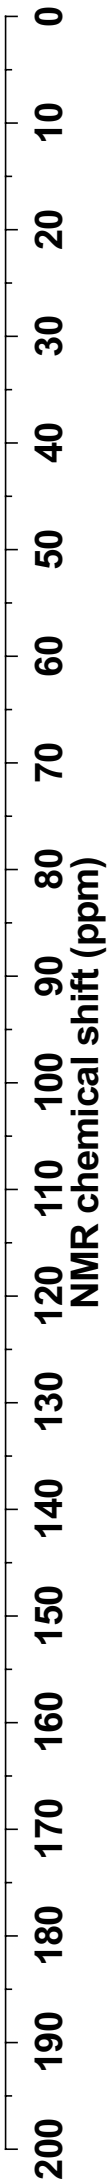

**<sup>13</sup>C-NMR spectrum of Intermediate-1**

| Parameter                 | Value                                                                                      |
|---------------------------|--------------------------------------------------------------------------------------------|
| 1 Data File Name          | E:/ NMRdata/ 10012008-02172009/ 600/ CBCOOC4H8Cl-4-methylcyclohexene25mer11042008.fid/ fid |
| 2 Title                   | CBCOOC4H8Cl-4-methylcyclohexene25mer11042008                                               |
| 3 Origin                  | inova                                                                                      |
| 4 Owner                   |                                                                                            |
| 5 Solvent                 | CD2Cl2                                                                                     |
| 6 Pulse Sequence          | s2pul                                                                                      |
| 7 Acquisition Date        | 2008-11-04T07:19:13                                                                        |
| 8 Modification Date       |                                                                                            |
| 9 Temperature             | 25.0                                                                                       |
| 10 Number of Scans        | 80                                                                                         |
| 11 Spectrometer Frequency | 599.72                                                                                     |
| 12 Spectral Width         | 8000.0                                                                                     |
| 13 Lowest Frequency       | -1001.2                                                                                    |
| 14 Nucleus                | 1H                                                                                         |
| 15 Acquired Size          | 15136                                                                                      |
| 16 Spectral Size          | 32768                                                                                      |

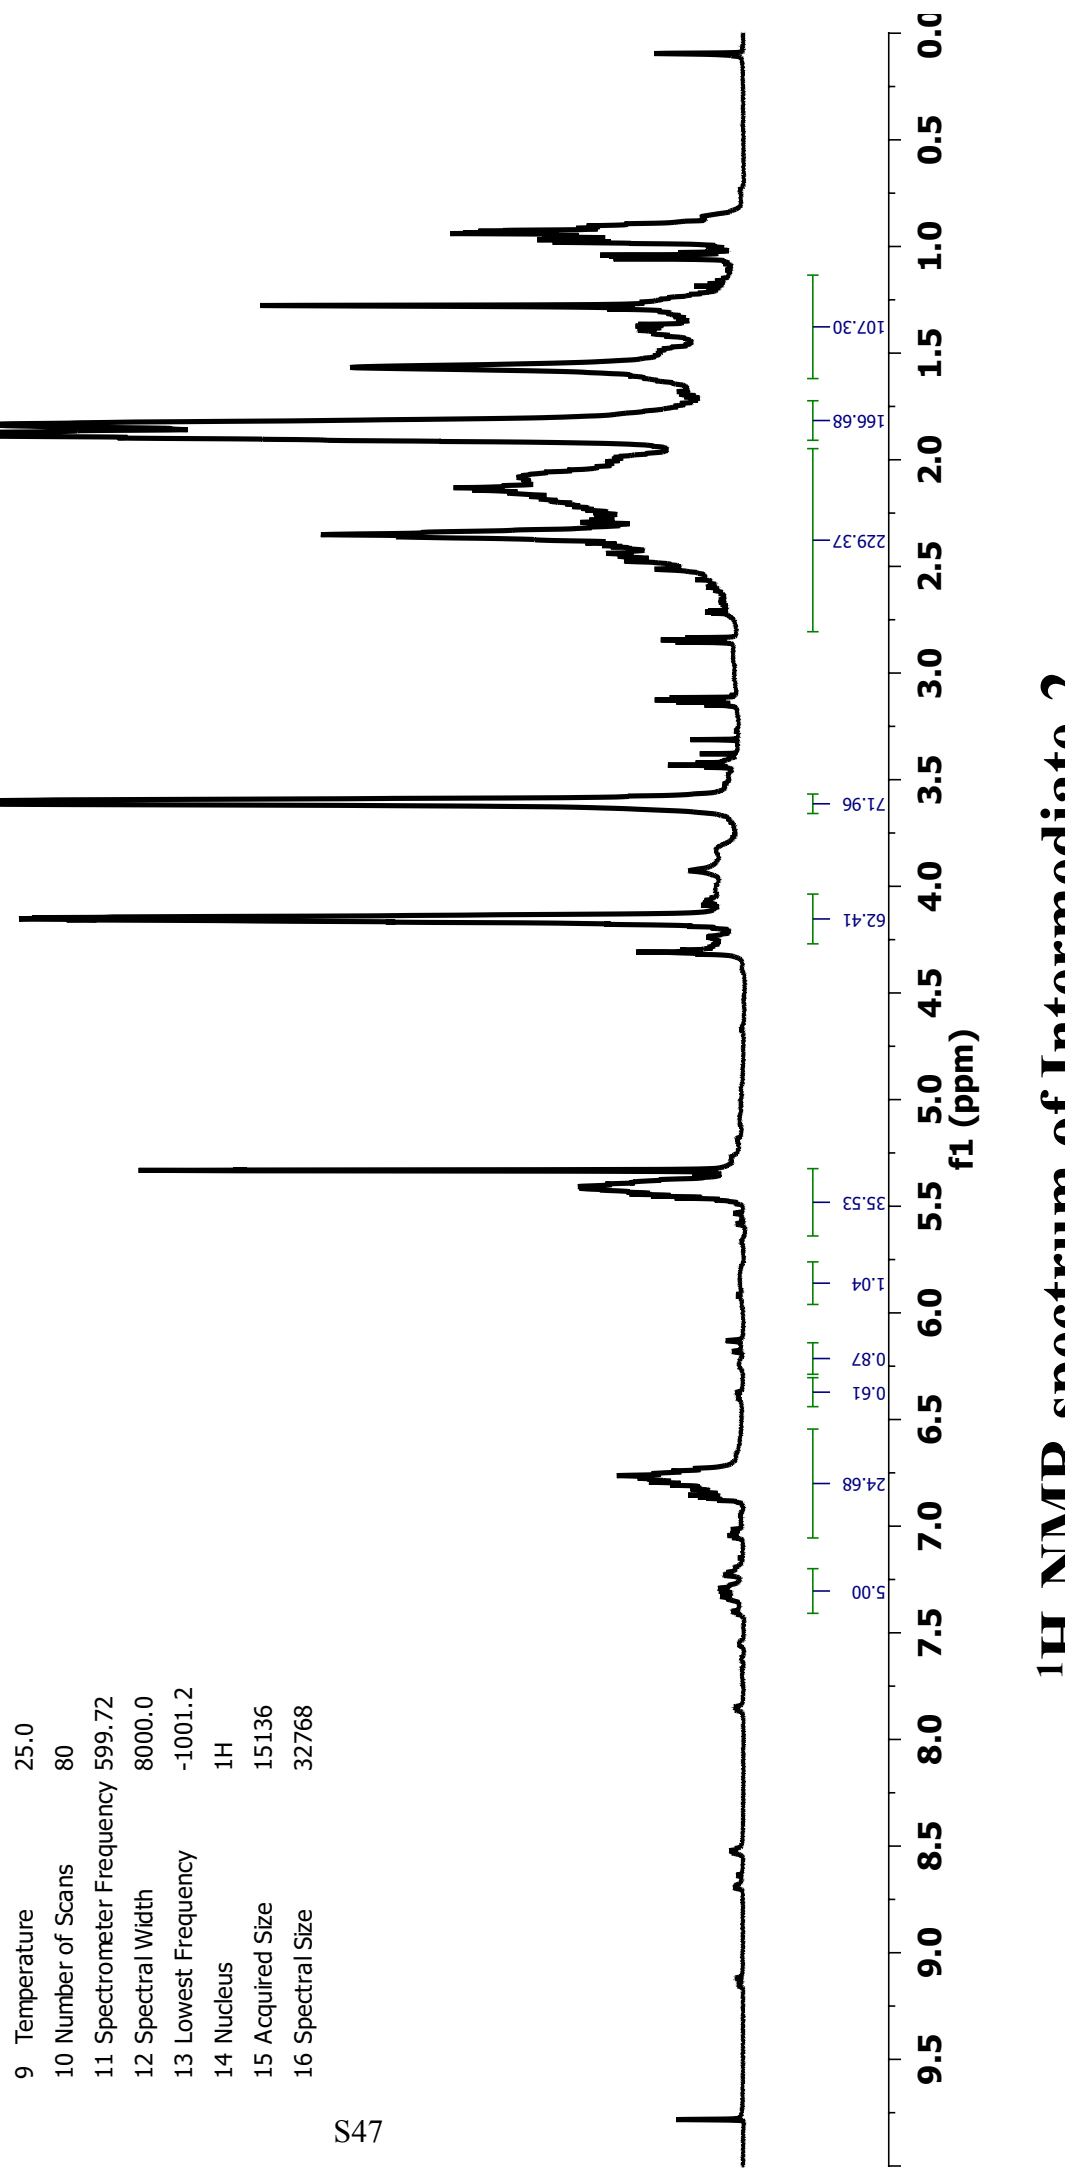

**<sup>1</sup>H-NMR spectrum of Intermediate-2**

Parameter Value  
1 Data File Name E:/ NMRdata/ 10012008-02172009/ 600/ CBCOOC4H8Cl-4-propylcyclohexeneamide25mer11072008.fid/ fid  
2 Title CBCOOC4H8Cl-4-propylcyclohexeneamide25mer11072008

3 Origin inova  
4 Owner  
5 Solvent CD2Cl2  
6 Pulse Sequence s2pul  
7 Acquisition Date 2008-11-07T05:18:30  
8 Modification Date

9 Temperature 25.0  
10 Number of Scans 40  
11 Spectrometer Frequency 599.72  
12 Spectral Width 8000.0  
13 Lowest Frequency -1001.2  
14 Nucleus <sup>1</sup>H  
15 Acquired Size 15136  
16 Spectral Size 32768

S48

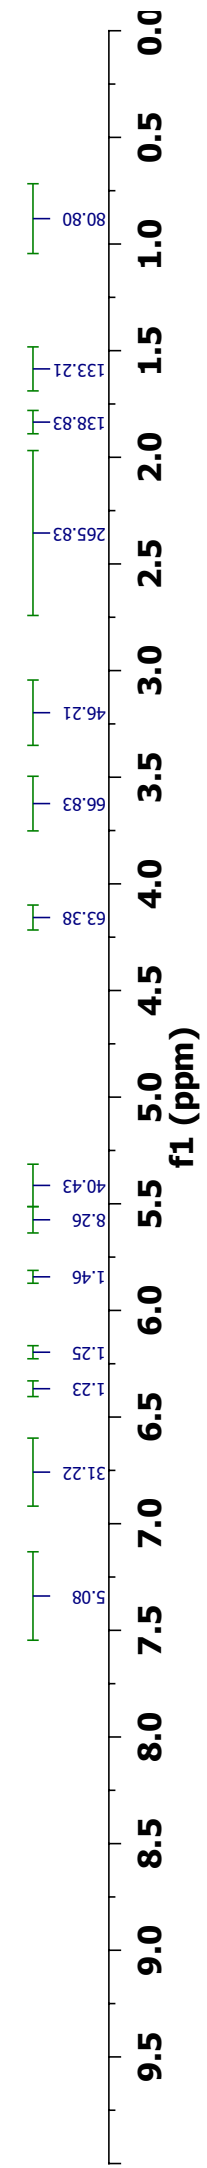

**<sup>1</sup>H-NMR spectrum of Intermediate-3**



Value

Parameter

1 Data File Name E:/NMRdata/10012008-02172009/500/CBCOOC4H8Cl-4-octylcyclohexeneamide25mer11112008.fid/ fid  
2 Title CBCOOC4H8Cl-4-octylcyclohexeneamide25mer11112008  
3 Origin inova  
4 Owner  
5 Solvent CD2Cl2  
6 Pulse Sequence s2pul  
7 Acquisition Date 2008-11-11T09:37:41  
8 Modification Date  
9 Temperature 25.0  
10 Number of Scans 88  
11 Spectrometer Frequency 499.90  
12 Spectral Width 8003.2  
13 Lowest Frequency -1002.3  
14 Nucleus <sup>1</sup>H  
15 Acquired Size 15136  
16 Spectral Size 32768

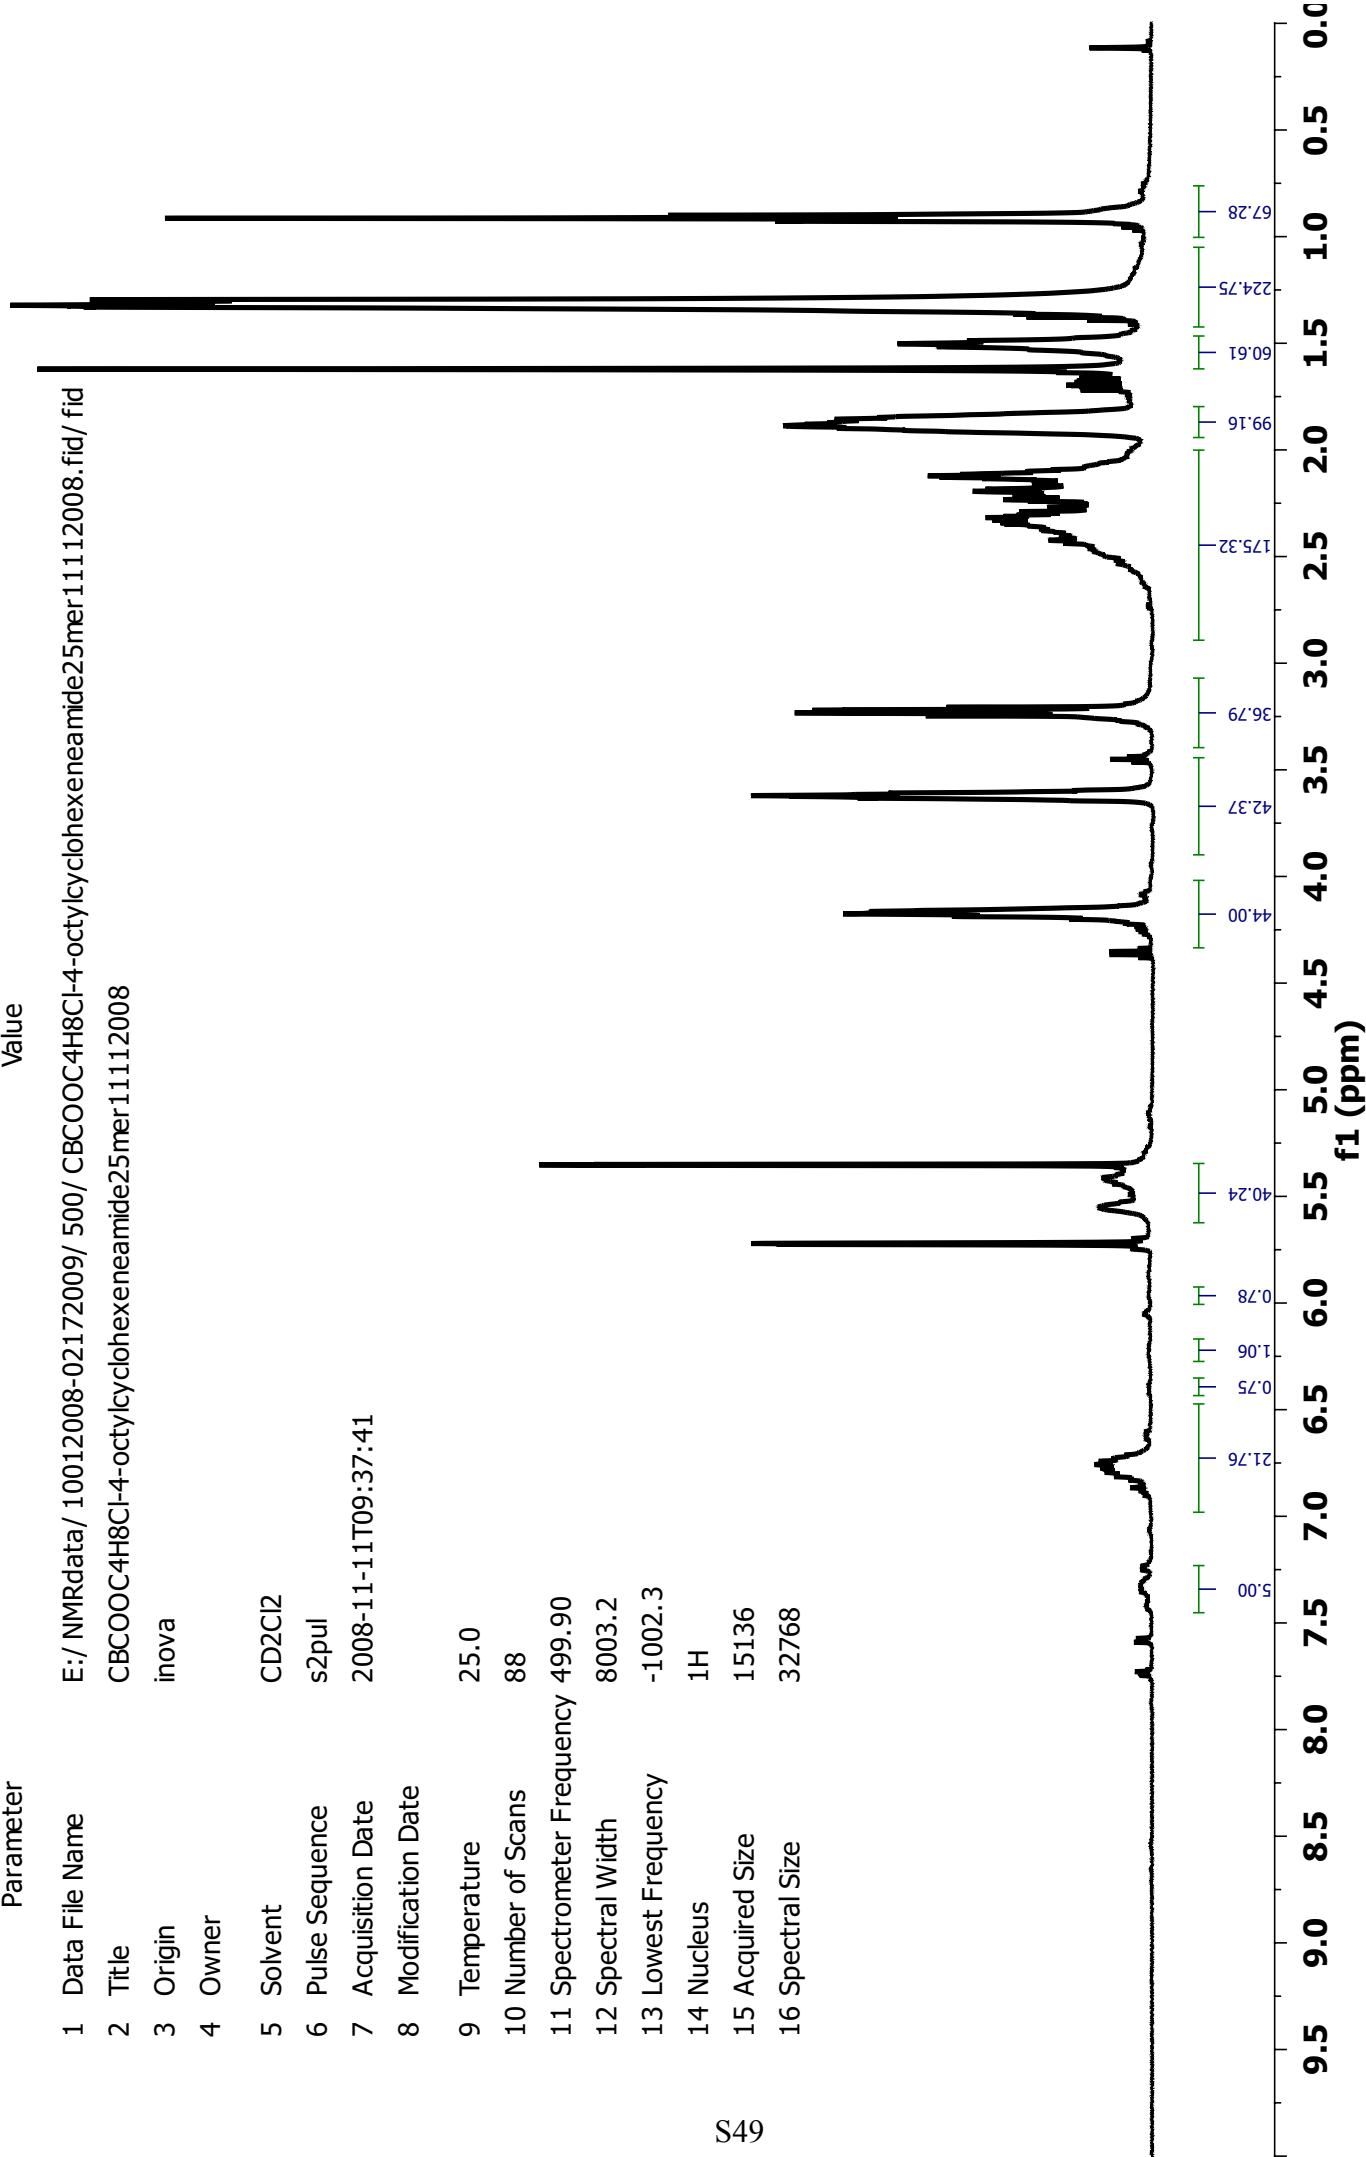

# <sup>1</sup>H-NMR spectrum of Intermediate-4

Parameter Value

|    |                        |                                                                                       |
|----|------------------------|---------------------------------------------------------------------------------------|
| 1  | Data File Name         | E:/ NMRdata/ 10012008-02172009/ 600/ CBCOOC4H8NHBoc-cyclohexene25mer12182008.fid/ fid |
| 2  | Title                  | CBCOOC4H8NHBoc-cyclohexene25mer12182008                                               |
| 3  | Origin                 | inova                                                                                 |
| 4  | Owner                  |                                                                                       |
| 5  | Solvent                | CD2Cl2                                                                                |
| 6  | Pulse Sequence         | s2pul                                                                                 |
| 7  | Acquisition Date       | 2008-12-18T05:30:40                                                                   |
| 8  | Modification Date      |                                                                                       |
| 9  | Temperature            | 25.0                                                                                  |
| 10 | Number of Scans        | 56                                                                                    |
| 11 | Spectrometer Frequency | 599.72                                                                                |
| 12 | Spectral Width         | 8000.0                                                                                |
| 13 | Lowest Frequency       | -1001.2                                                                               |
| 14 | Nucleus                | <sup>1</sup> H                                                                        |
| 15 | Acquired Size          | 15136                                                                                 |
| 16 | Spectral Size          | 32768                                                                                 |

S50

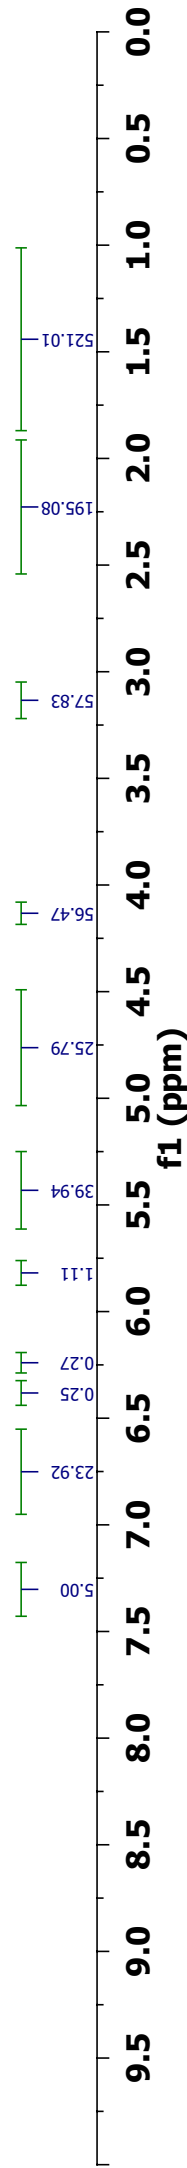

**<sup>1</sup>H-NMR spectrum of Intermediate-6**

Parameter Value

|    |                        |                                                                                           |
|----|------------------------|-------------------------------------------------------------------------------------------|
| 1  | Data File Name         | E:/ NMRdata/ 02182009-09172009/ 600/ CBCOOC2H4N=CNHBoc2-cyclohexene25mer03252009.fid/ fid |
| 2  | Title                  | CBCOOC2H4N=CNHBoc2-cyclohexene25mer03252009                                               |
| 3  | Origin                 | inova                                                                                     |
| 4  | Owner                  |                                                                                           |
| 5  | Solvent                | CD2Cl2                                                                                    |
| 6  | Pulse Sequence         | s2pul                                                                                     |
| 7  | Acquisition Date       | 2009-03-25T04:38:27                                                                       |
| 8  | Modification Date      |                                                                                           |
| 9  | Temperature            | 25.0                                                                                      |
| 10 | Number of Scans        | 64                                                                                        |
| 11 | Spectrometer Frequency | 599.72                                                                                    |
| 12 | Spectral Width         | 8000.0                                                                                    |
| 13 | Lowest Frequency       | -1001.2                                                                                   |
| 14 | Nucleus                | <sup>1</sup> H                                                                            |
| 15 | Acquired Size          | 15136                                                                                     |
| 16 | Spectral Size          | 32768                                                                                     |

S51

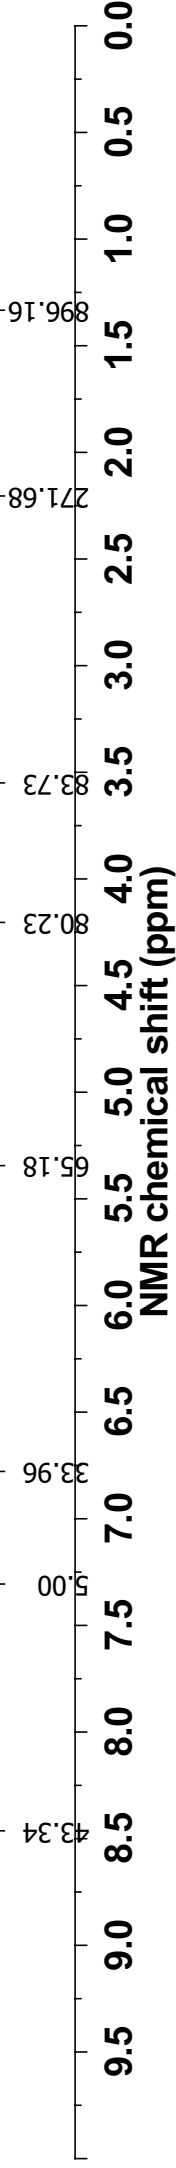

**<sup>1</sup>H-NMR spectrum of Intermediate-7**

Parameter Value

1 Data File Name E:/ NMRdata/ 10012008-02172009/ 500/ CBCONHC4H8Cl-cyclooctene4mer12232008.fid/ fid  
2 Title CBCONHC4H8Cl-cyclooctene4mer12232008  
3 Origin inova  
4 Owner  
5 Solvent Acetone  
6 Pulse Sequence s2pul  
7 Acquisition Date 2008-12-23T07:11:02  
8 Modification Date  
9 Temperature 25.0  
10 Number of Scans 32  
11 Spectrometer Frequency 499.90  
12 Spectral Width 8003.2  
13 Lowest Frequency -1002.2  
14 Nucleus  $^1\text{H}$   
15 Acquired Size 15136  
16 Spectral Size 32768

SS

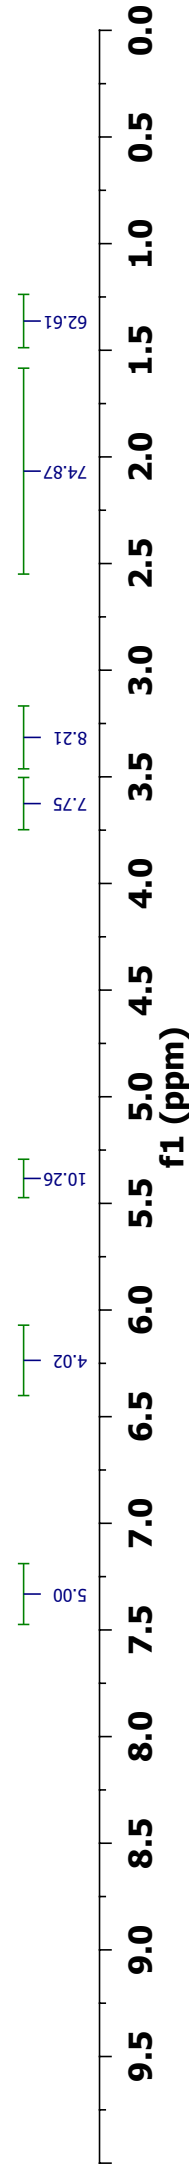

$^1\text{H}$ -NMR spectrum of Intermediate-8

| Parameter                 | Value                                                                              |
|---------------------------|------------------------------------------------------------------------------------|
| 1 Data File Name          | E:/ NMRdata/ 10012008-02172009/ 500/ CBCONHC4H8Cl-cyclooctene8mer12032008.fid/ fid |
| 2 Title                   | CBCONHC4H8Cl-cyclooctene8mer12032008                                               |
| 3 Origin                  | inova                                                                              |
| 4 Owner                   |                                                                                    |
| 5 Solvent                 | CD2Cl2                                                                             |
| 6 Pulse Sequence          | s2pul                                                                              |
| 7 Acquisition Date        | 2008-12-03T05:36:48                                                                |
| 8 Modification Date       |                                                                                    |
| 9 Temperature             | 25.0                                                                               |
| 10 Number of Scans        | 72                                                                                 |
| 11 Spectrometer Frequency | 499.90                                                                             |
| 12 Spectral Width         | 8003.2                                                                             |
| 13 Lowest Frequency       | -1002.3                                                                            |
| 14 Nucleus                | 1H                                                                                 |
| 15 Acquired Size          | 15136                                                                              |
| 16 Spectral Size          | 32768                                                                              |

S53

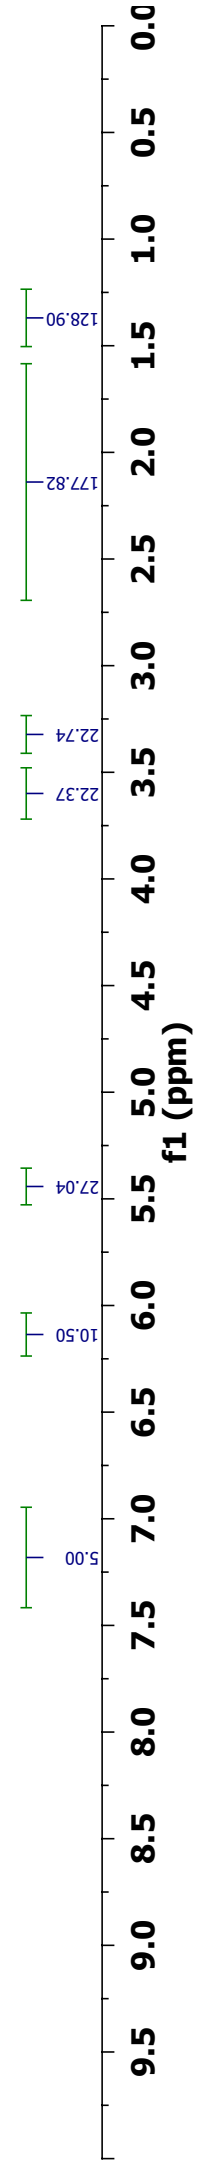

# <sup>1</sup>H-NMR spectrum of Intermediate-9

Parameter

Value

|    |                        |                                                                                     |
|----|------------------------|-------------------------------------------------------------------------------------|
| 1  | Data File Name         | E:/ NMRdata/ 10012008-02172009/ 500/ CBCONHC4H8Cl-cyclooctene25mer12032008.fid/ fid |
| 2  | Title                  | CBCONHC4H8Cl-cyclooctene25mer12032008                                               |
| 3  | Origin                 | inova                                                                               |
| 4  | Owner                  |                                                                                     |
| 5  | Solvent                | CD2Cl2                                                                              |
| 6  | Pulse Sequence         | s2pul                                                                               |
| 7  | Acquisition Date       | 2008-12-03T05:46:13                                                                 |
| 8  | Modification Date      |                                                                                     |
| 9  | Temperature            | 25.0                                                                                |
| 10 | Number of Scans        | 56                                                                                  |
| 11 | Spectrometer Frequency | 499.90                                                                              |
| 12 | Spectral Width         | 8003.2                                                                              |
| 13 | Lowest Frequency       | -1002.3                                                                             |
| 14 | Nucleus                | <sup>1</sup> H                                                                      |
| 15 | Acquired Size          | 15136                                                                               |
| 16 | Spectral Size          | 32768                                                                               |

S54

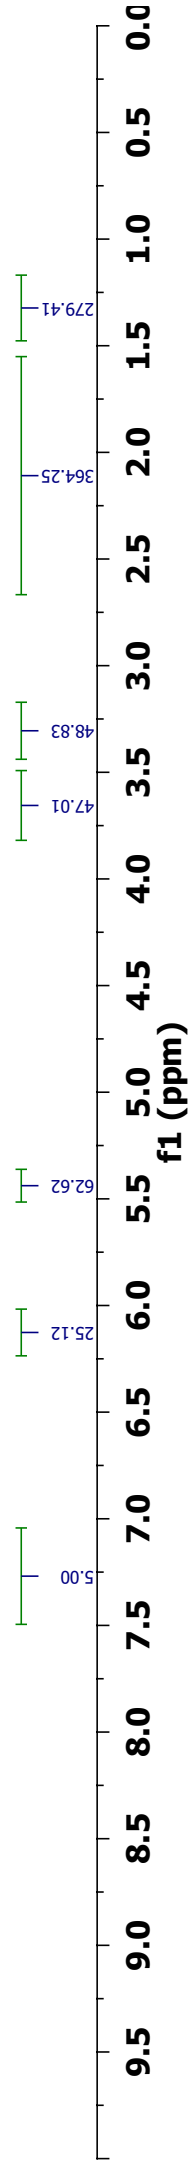

# <sup>1</sup>H-NMR spectrum of Intermediate-10

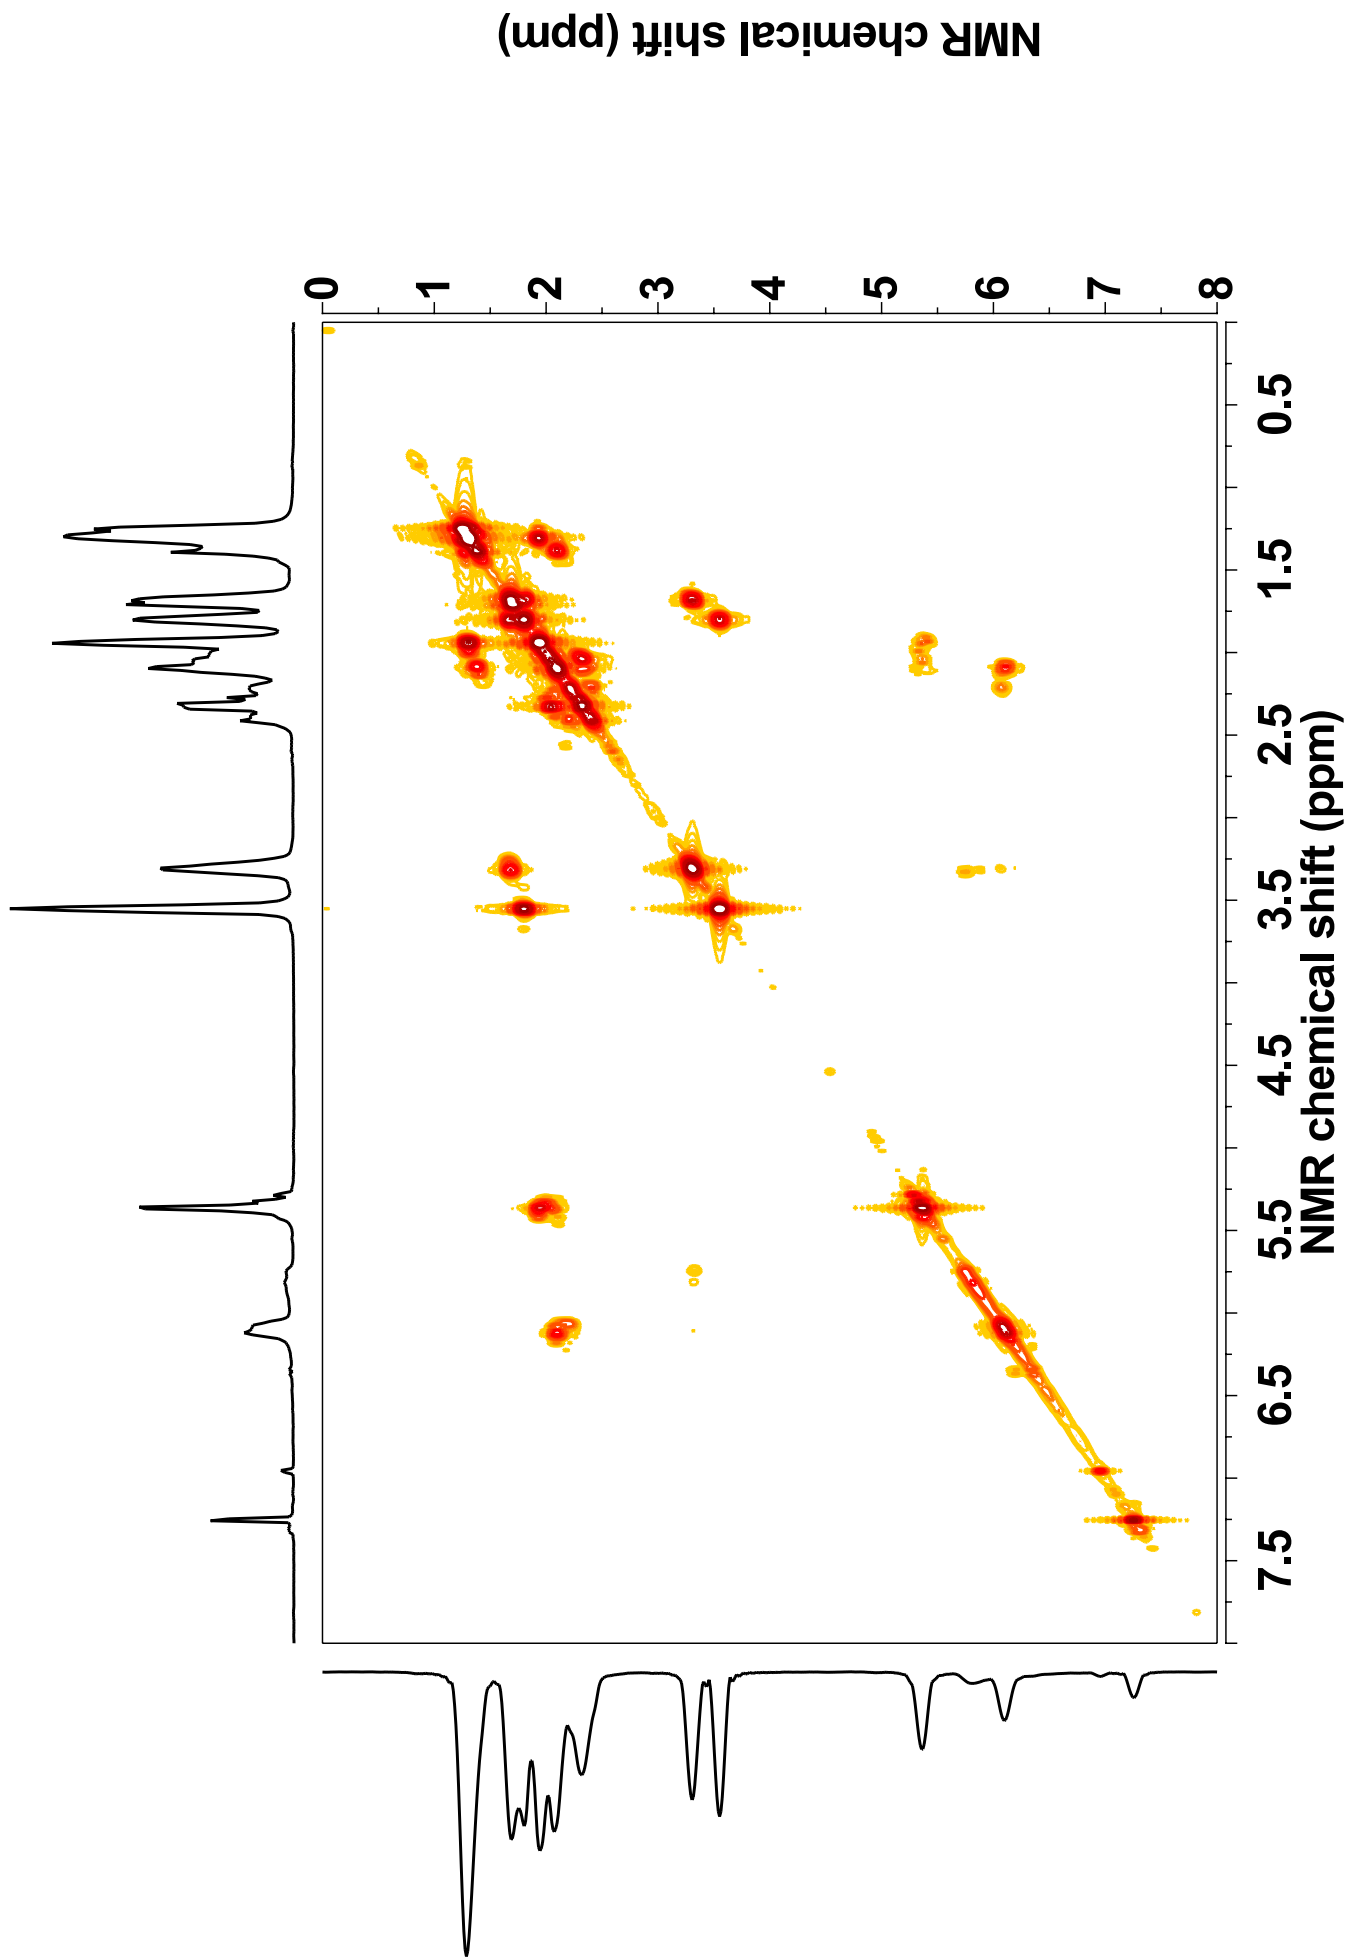

$^1\text{H}$ - $^1\text{H}$ -gCOSY-NMR spectrum of Intermediate-10

| Parameter                 | Value                                                                         |
|---------------------------|-------------------------------------------------------------------------------|
| 1 Data File Name          | E:/ NMRdata/ 12122009-01262010/ 500/ Pre-Polymer-10-C13NMR/ 01252010.fid/ fid |
| 2 Title                   | CBCONHC4H8Cl-cyclooctene25mer-C13NMR                                          |
| 3 Origin                  | inova                                                                         |
| 4 Owner                   |                                                                               |
| 5 Solvent                 | CDCl3                                                                         |
| 6 Pulse Sequence          | s2pul                                                                         |
| 7 Acquisition Date        | 2010-01-25T13:12:42                                                           |
| 8 Modification Date       |                                                                               |
| 9 Temperature             | 25.0                                                                          |
| 10 Number of Scans        | 5944                                                                          |
| 11 Spectrometer Frequency | 125.71                                                                        |
| 12 Spectral Width         | 31446.5                                                                       |
| 13 Lowest Frequency       | -2206.6                                                                       |
| 14 Nucleus                | 13C                                                                           |
| 15 Acquired Size          | 40896                                                                         |
| 16 Spectral Size          | 131072                                                                        |

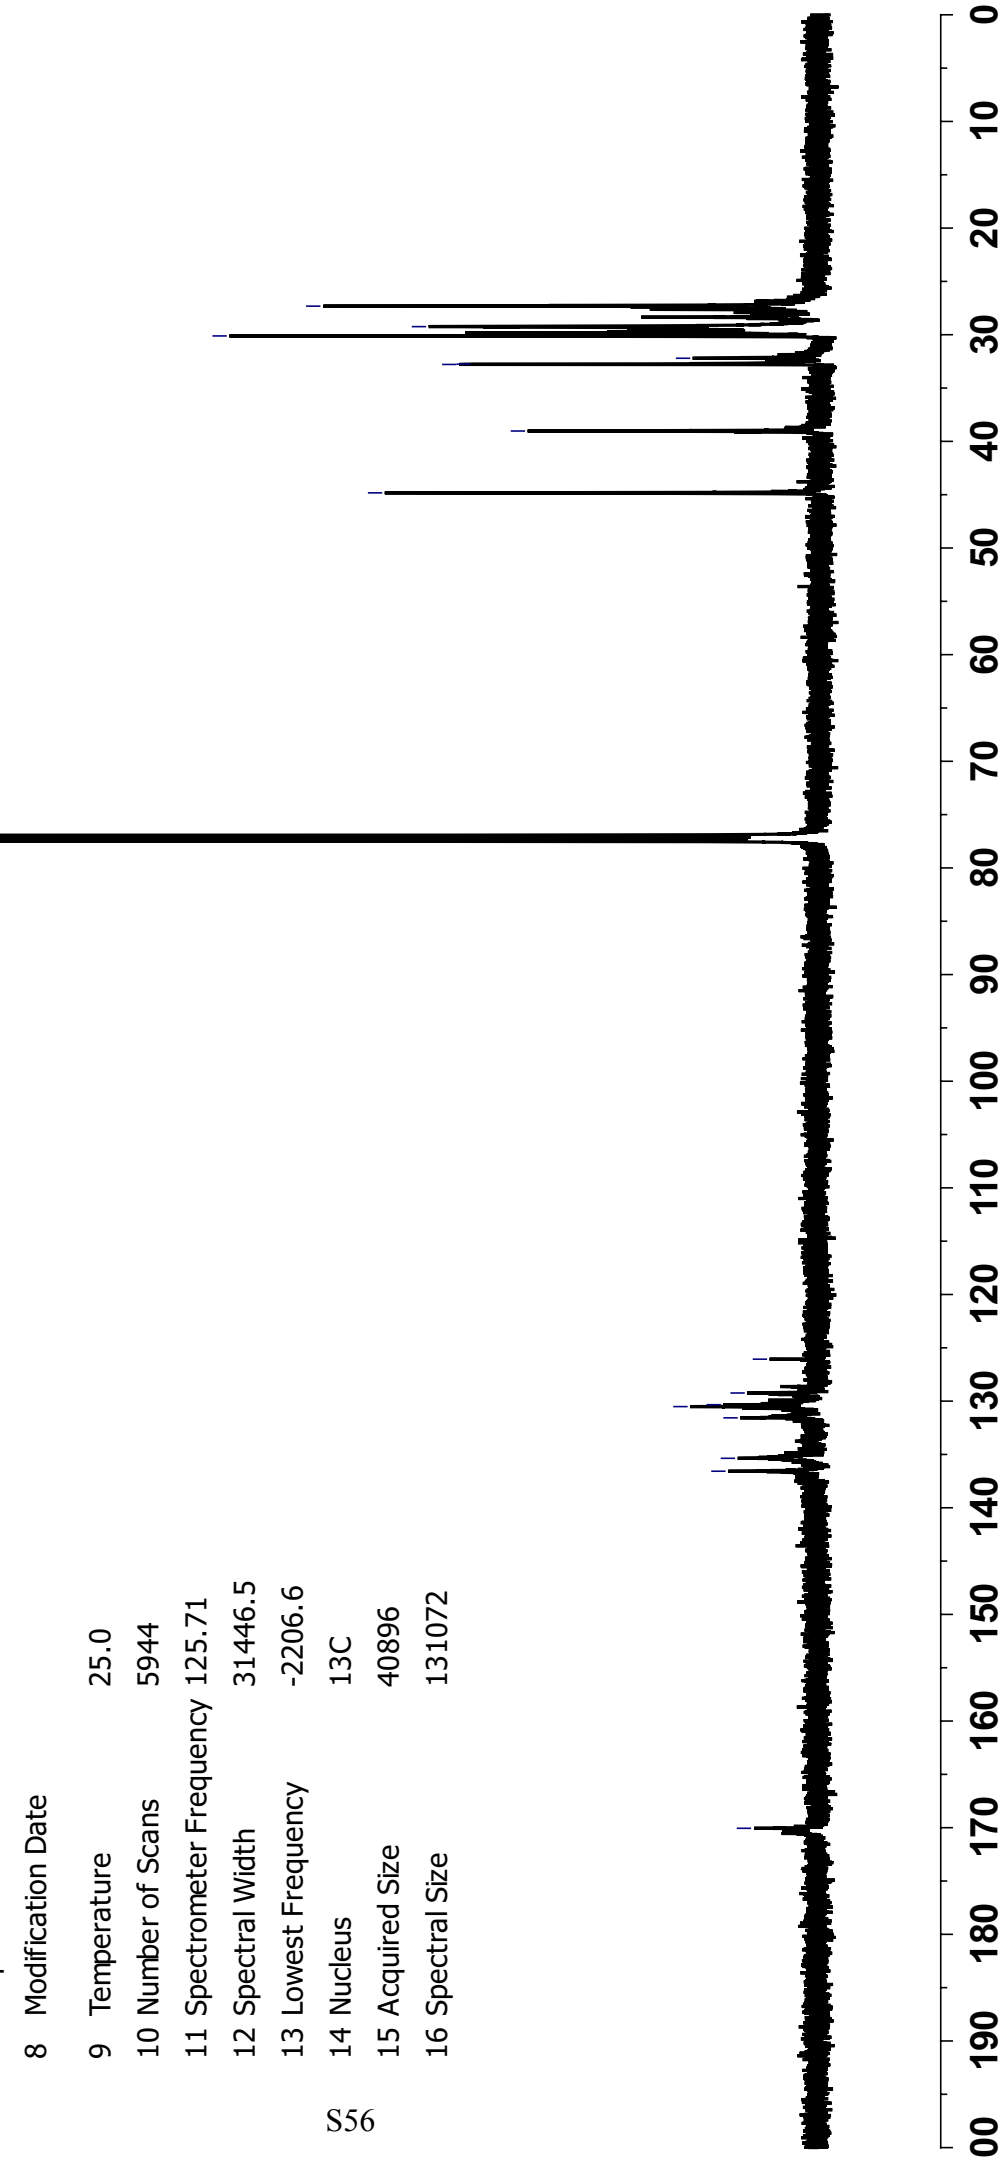

**<sup>13</sup>C-NMR spectrum of Intermediate-10**



Value

1 Data File Name E:/ NMRdata/ 02182009-09172009/ 500/ CBCONHC4H8Cl-4mer04102009.fid/ fid

2 Title CBCONHC4H8Cl-4mer04102009

3 Origin inova

4 Owner

5 Solvent CD2Cl2

6 Pulse Sequence s2pul

7 Acquisition Date 2009-04-10T05:19:31

8 Modification Date

9 Temperature 25.0

10 Number of Scans 96

11 Spectrometer Frequency 499.90

12 Spectral Width 8003.2

13 Lowest Frequency -1002.3

14 Nucleus <sup>1</sup>H

15 Acquired Size 15136

16 Spectral Size 32768

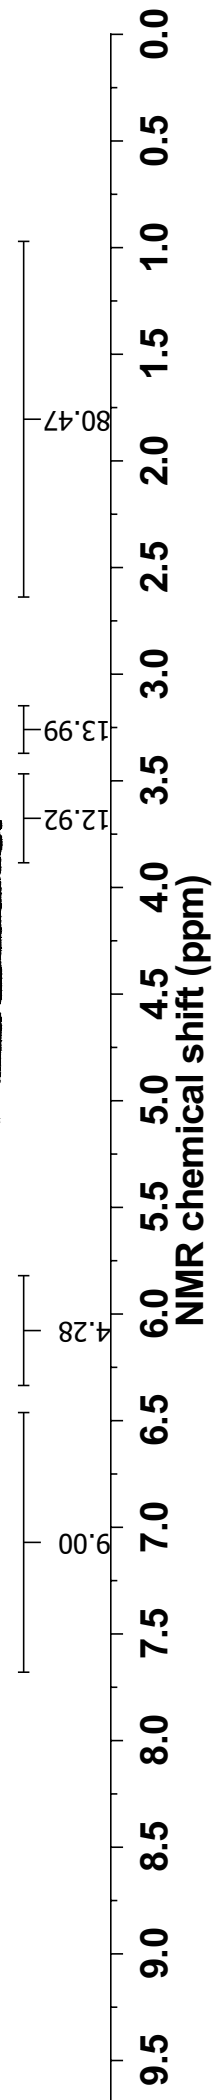

**<sup>1</sup>H-NMR spectrum of Intermediate-11**

| Parameter                 | Value                                                                   |
|---------------------------|-------------------------------------------------------------------------|
| 1 Data File Name          | E:/ NMRdata/ 02182009-09172009/ 600/ CBCONHC4H8Cl-8mer04062009.fid/ fid |
| 2 Title                   | CBCONHC4H8Cl-8mer04062009                                               |
| 3 Origin                  | inova                                                                   |
| 4 Owner                   |                                                                         |
| 5 Solvent                 | CD2Cl2                                                                  |
| 6 Pulse Sequence          | s2pul                                                                   |
| 7 Acquisition Date        | 2009-04-06T07:41:25                                                     |
| 8 Modification Date       |                                                                         |
| 9 Temperature             | 25.0                                                                    |
| 10 Number of Scans        | 48                                                                      |
| 11 Spectrometer Frequency | 599.72                                                                  |
| 12 Spectral Width         | 8000.0                                                                  |
| 13 Lowest Frequency       | -1001.2                                                                 |
| 14 Nucleus                | <sup>1</sup> H                                                          |
| 15 Acquired Size          | 15136                                                                   |
| 16 Spectral Size          | 32768                                                                   |

S58

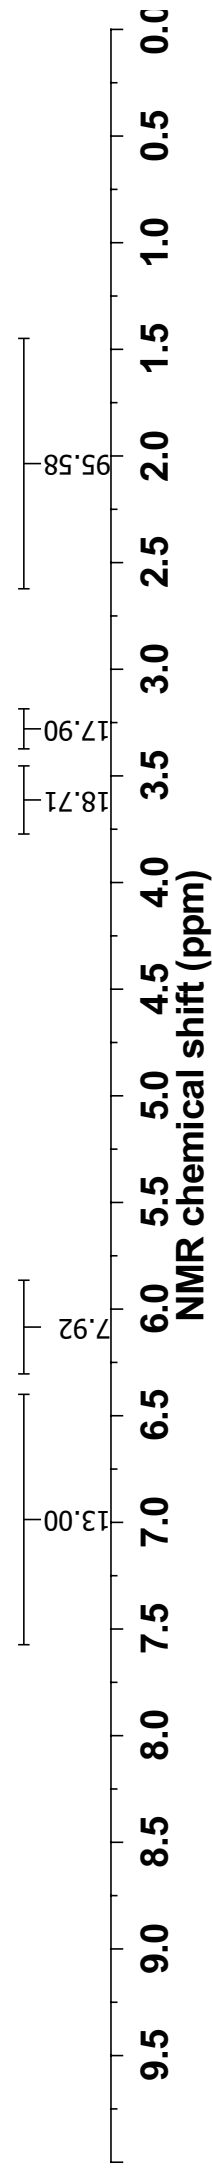

## <sup>1</sup>H-NMR spectrum of Intermediate-12

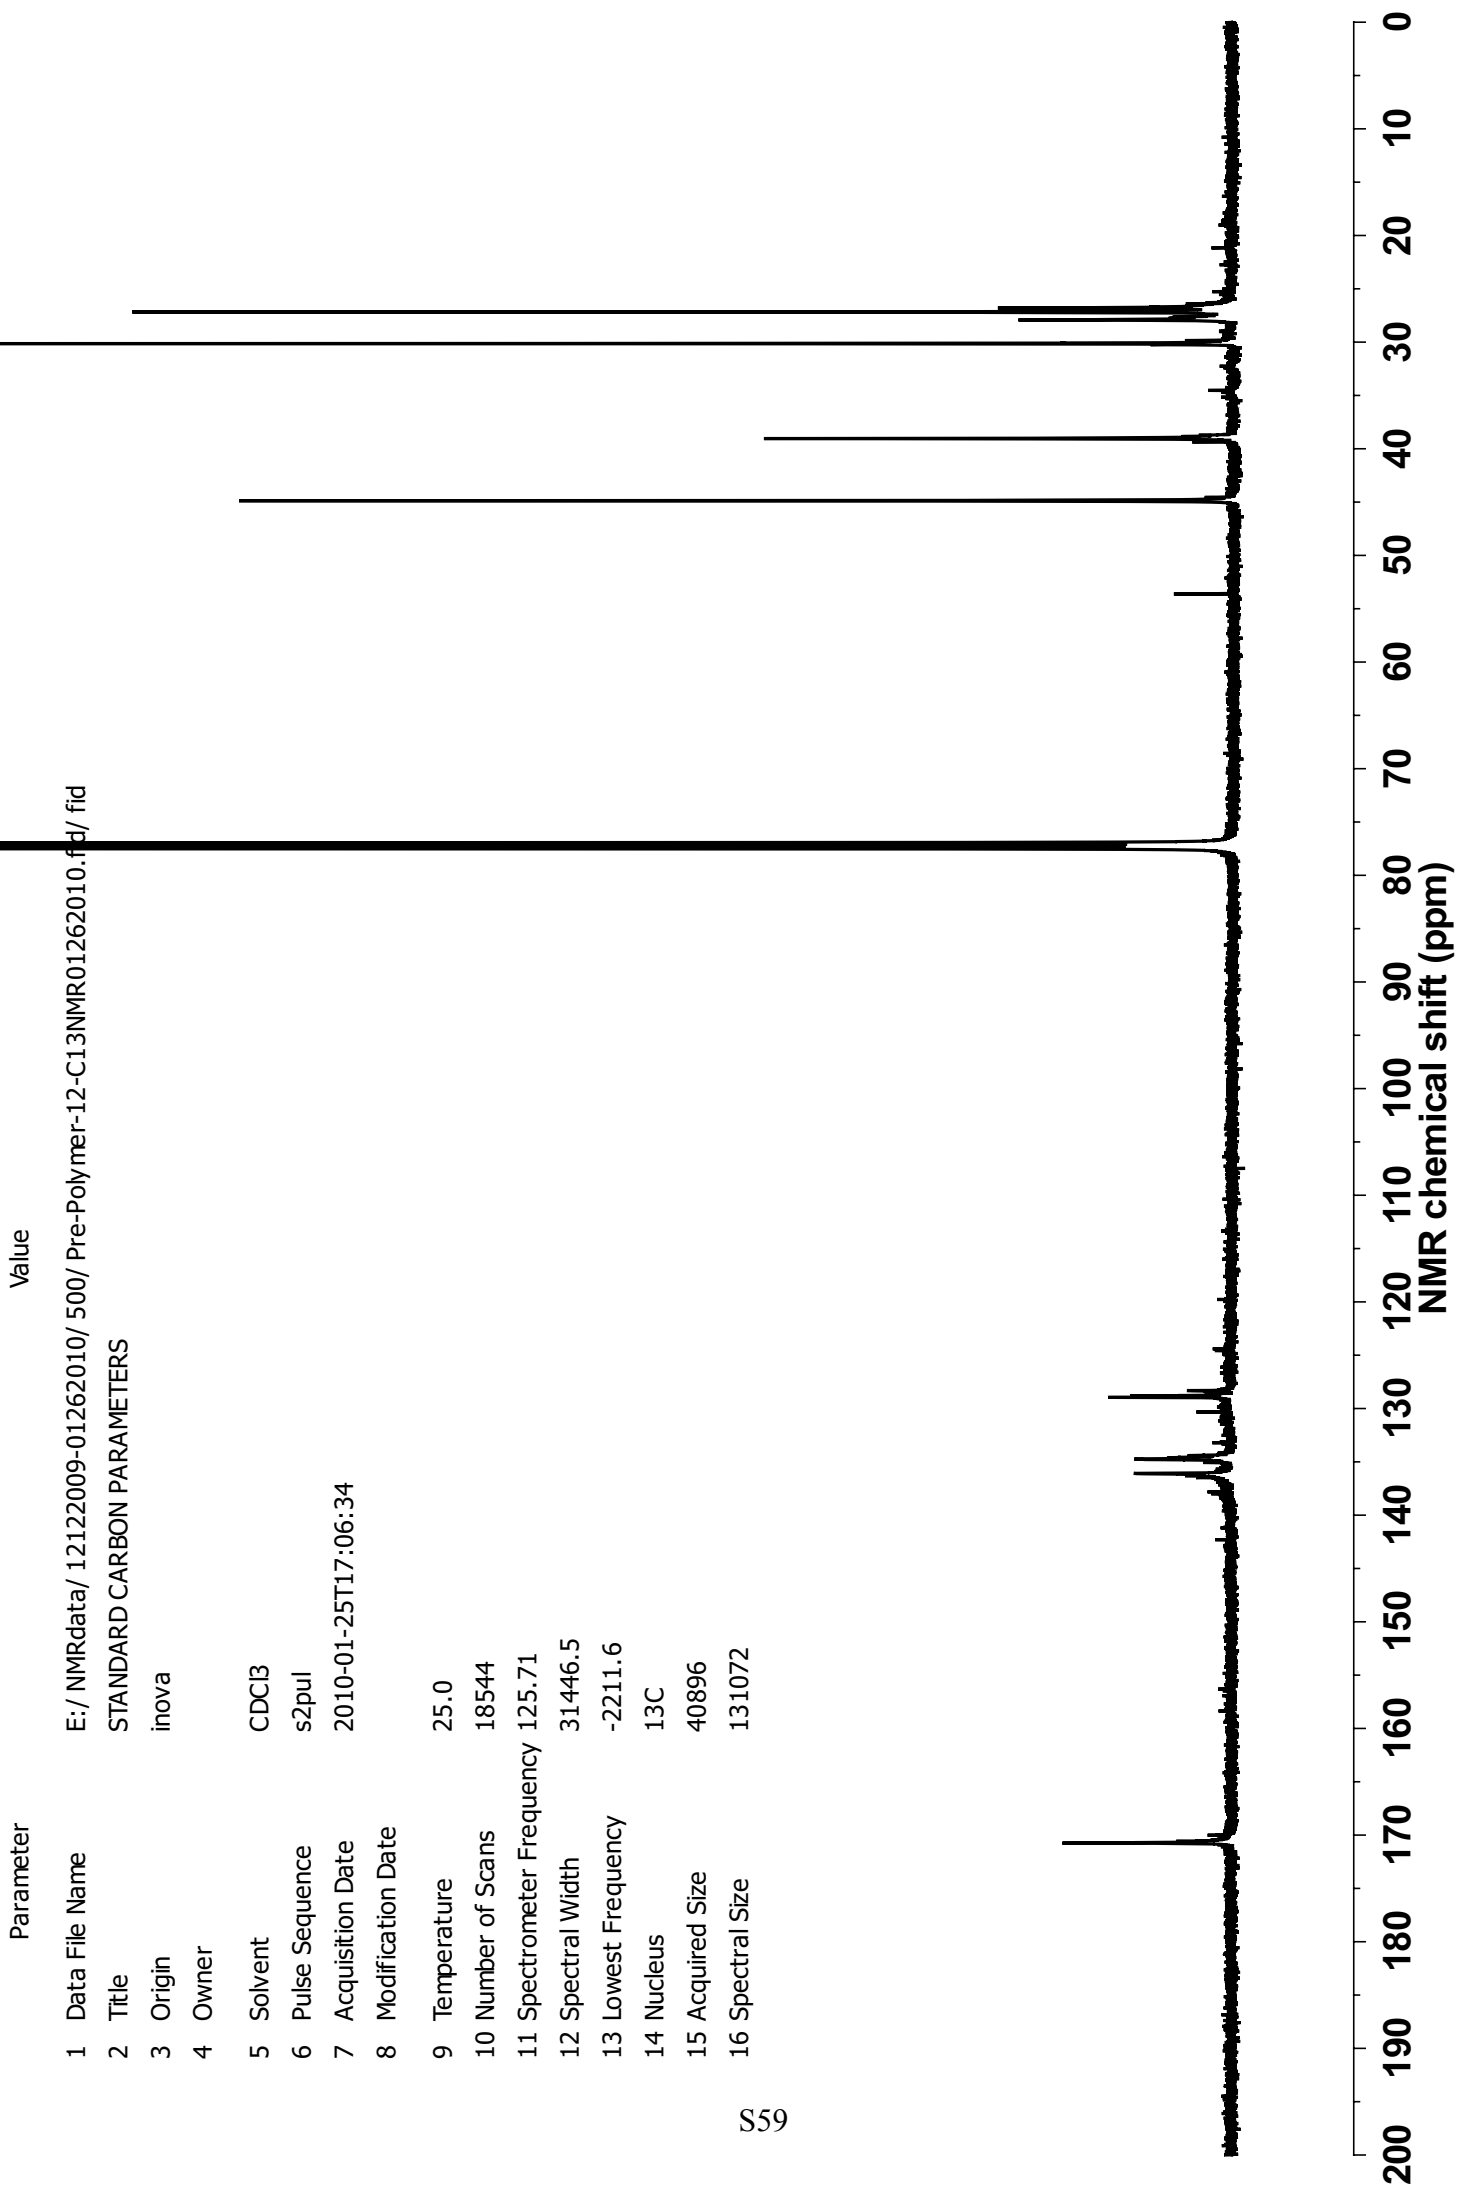

Value

Parameter

|    |                        |                                                                             |
|----|------------------------|-----------------------------------------------------------------------------|
| 1  | Data File Name         | E:/ NMRdata/ 12122009-01262010/ 500/ Pre-Polymer-12-C13NMR01262010.fid/ fid |
| 2  | Title                  | STANDARD CARBON PARAMETERS                                                  |
| 3  | Origin                 | inova                                                                       |
| 4  | Owner                  |                                                                             |
| 5  | Solvent                | CDCl <sub>3</sub>                                                           |
| 6  | Pulse Sequence         | s2pul                                                                       |
| 7  | Acquisition Date       | 2010-01-25T17:06:34                                                         |
| 8  | Modification Date      |                                                                             |
| 9  | Temperature            | 25.0                                                                        |
| 10 | Number of Scans        | 18544                                                                       |
| 11 | Spectrometer Frequency | 125.71                                                                      |
| 12 | Spectral Width         | 31446.5                                                                     |
| 13 | Lowest Frequency       | -2211.6                                                                     |
| 14 | Nucleus                | <sup>13</sup> C                                                             |
| 15 | Acquired Size          | 40896                                                                       |
| 16 | Spectral Size          | 131072                                                                      |

<sup>13</sup>C-NMR spectrum of Intermediate-12

## Parameter

## Value

|    |                        |                                                                                   |
|----|------------------------|-----------------------------------------------------------------------------------|
| 1  | Data File Name         | E:/ NMRdata/ 12122009-01262010/ 500/ 5-cycloocteneCOOC4H8Cl-4mer01232010.fid/ fid |
| 2  | Title                  | 5-cycloocteneCOOC4H8Cl-4mer-01242010                                              |
| 3  | Origin                 | inova                                                                             |
| 4  | Owner                  |                                                                                   |
| 5  | Solvent                | CD2Cl2                                                                            |
| 6  | Pulse Sequence         | s2pul                                                                             |
| 7  | Acquisition Date       | 2010-01-23T13:30:01                                                               |
| 8  | Modification Date      |                                                                                   |
| 9  | Temperature            | 25.0                                                                              |
| 10 | Number of Scans        | 216                                                                               |
| 11 | Spectrometer Frequency | 499.90                                                                            |
| 12 | Spectral Width         | 8003.2                                                                            |
| 13 | Lowest Frequency       | -1002.3                                                                           |
| 14 | Nucleus                | <sup>1</sup> H                                                                    |
| 15 | Acquired Size          | 15136                                                                             |
| 16 | Spectral Size          | 32768                                                                             |

56

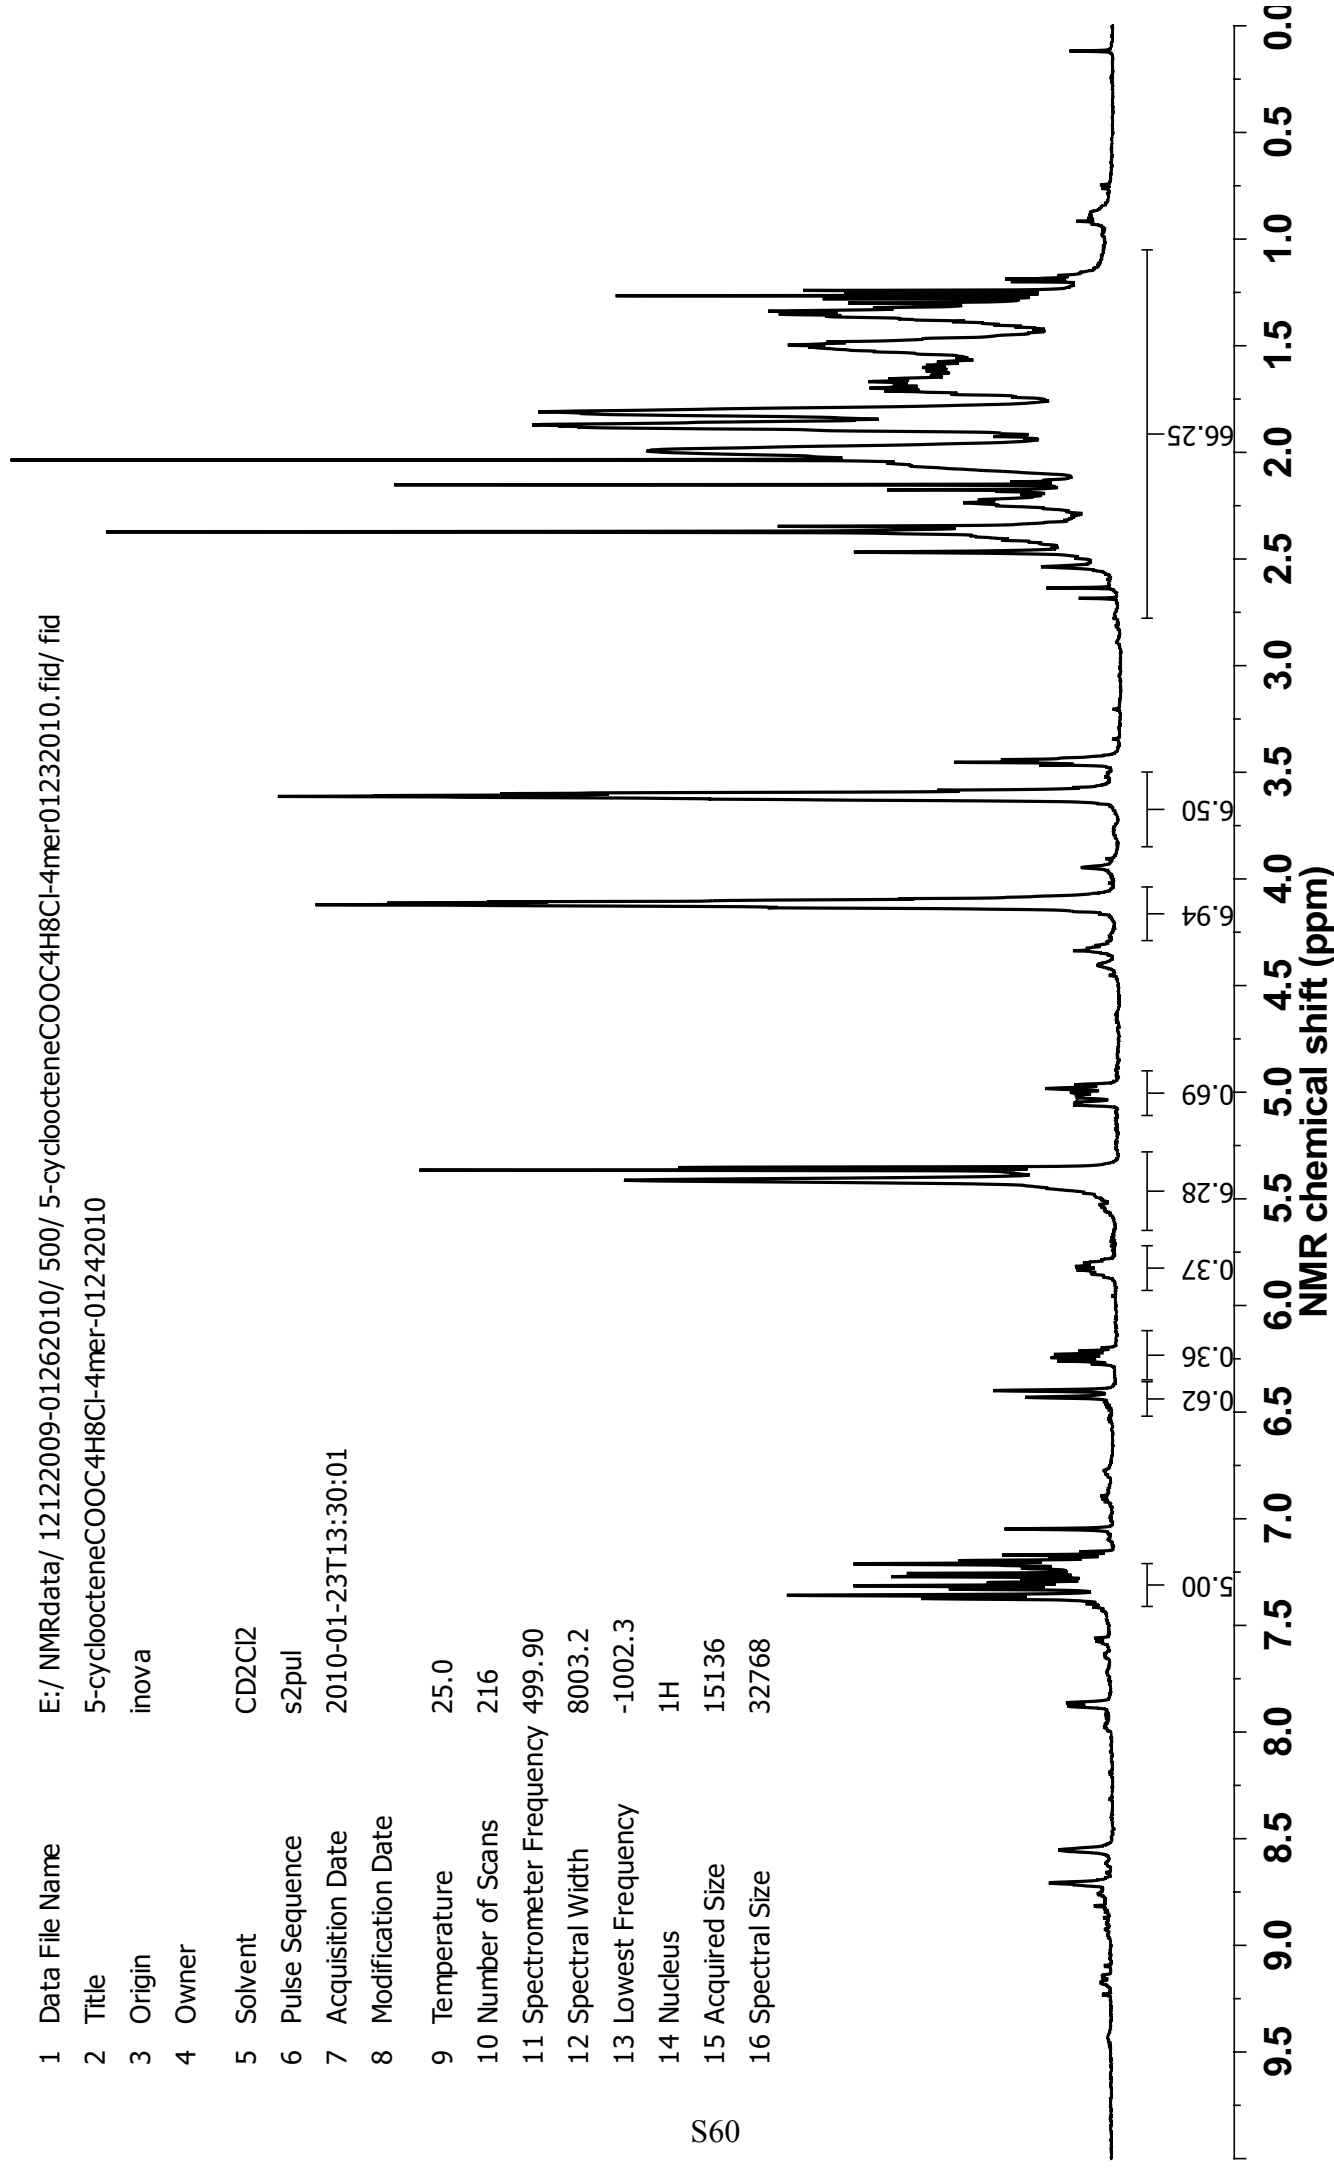**<sup>1</sup>H-NMR spectrum of Intermediate-13**

Parameter Value  
1 Data File Name E:/ NMRdata/ 12122009-01262010/ 500/ 5-cycloocteneCOOC4H8Cl-8me01242010-2.fid/ fid

2 Title STANDARD PROTON PARAMETERS

3 Origin inova  
4 Owner  
5 Solvent CD2Cl2  
6 Pulse Sequence s2pul  
7 Acquisition Date 2010-01-23T13:45:13

8 Modification Date  
9 Temperature 25.0  
10 Number of Scans 19896  
11 Spectrometer Frequency 499.90  
12 Spectral Width 8003.2  
13 Lowest Frequency -1002.3  
14 Nucleus  $^1\text{H}$   
15 Acquired Size 15136  
16 Spectral Size 32768

19

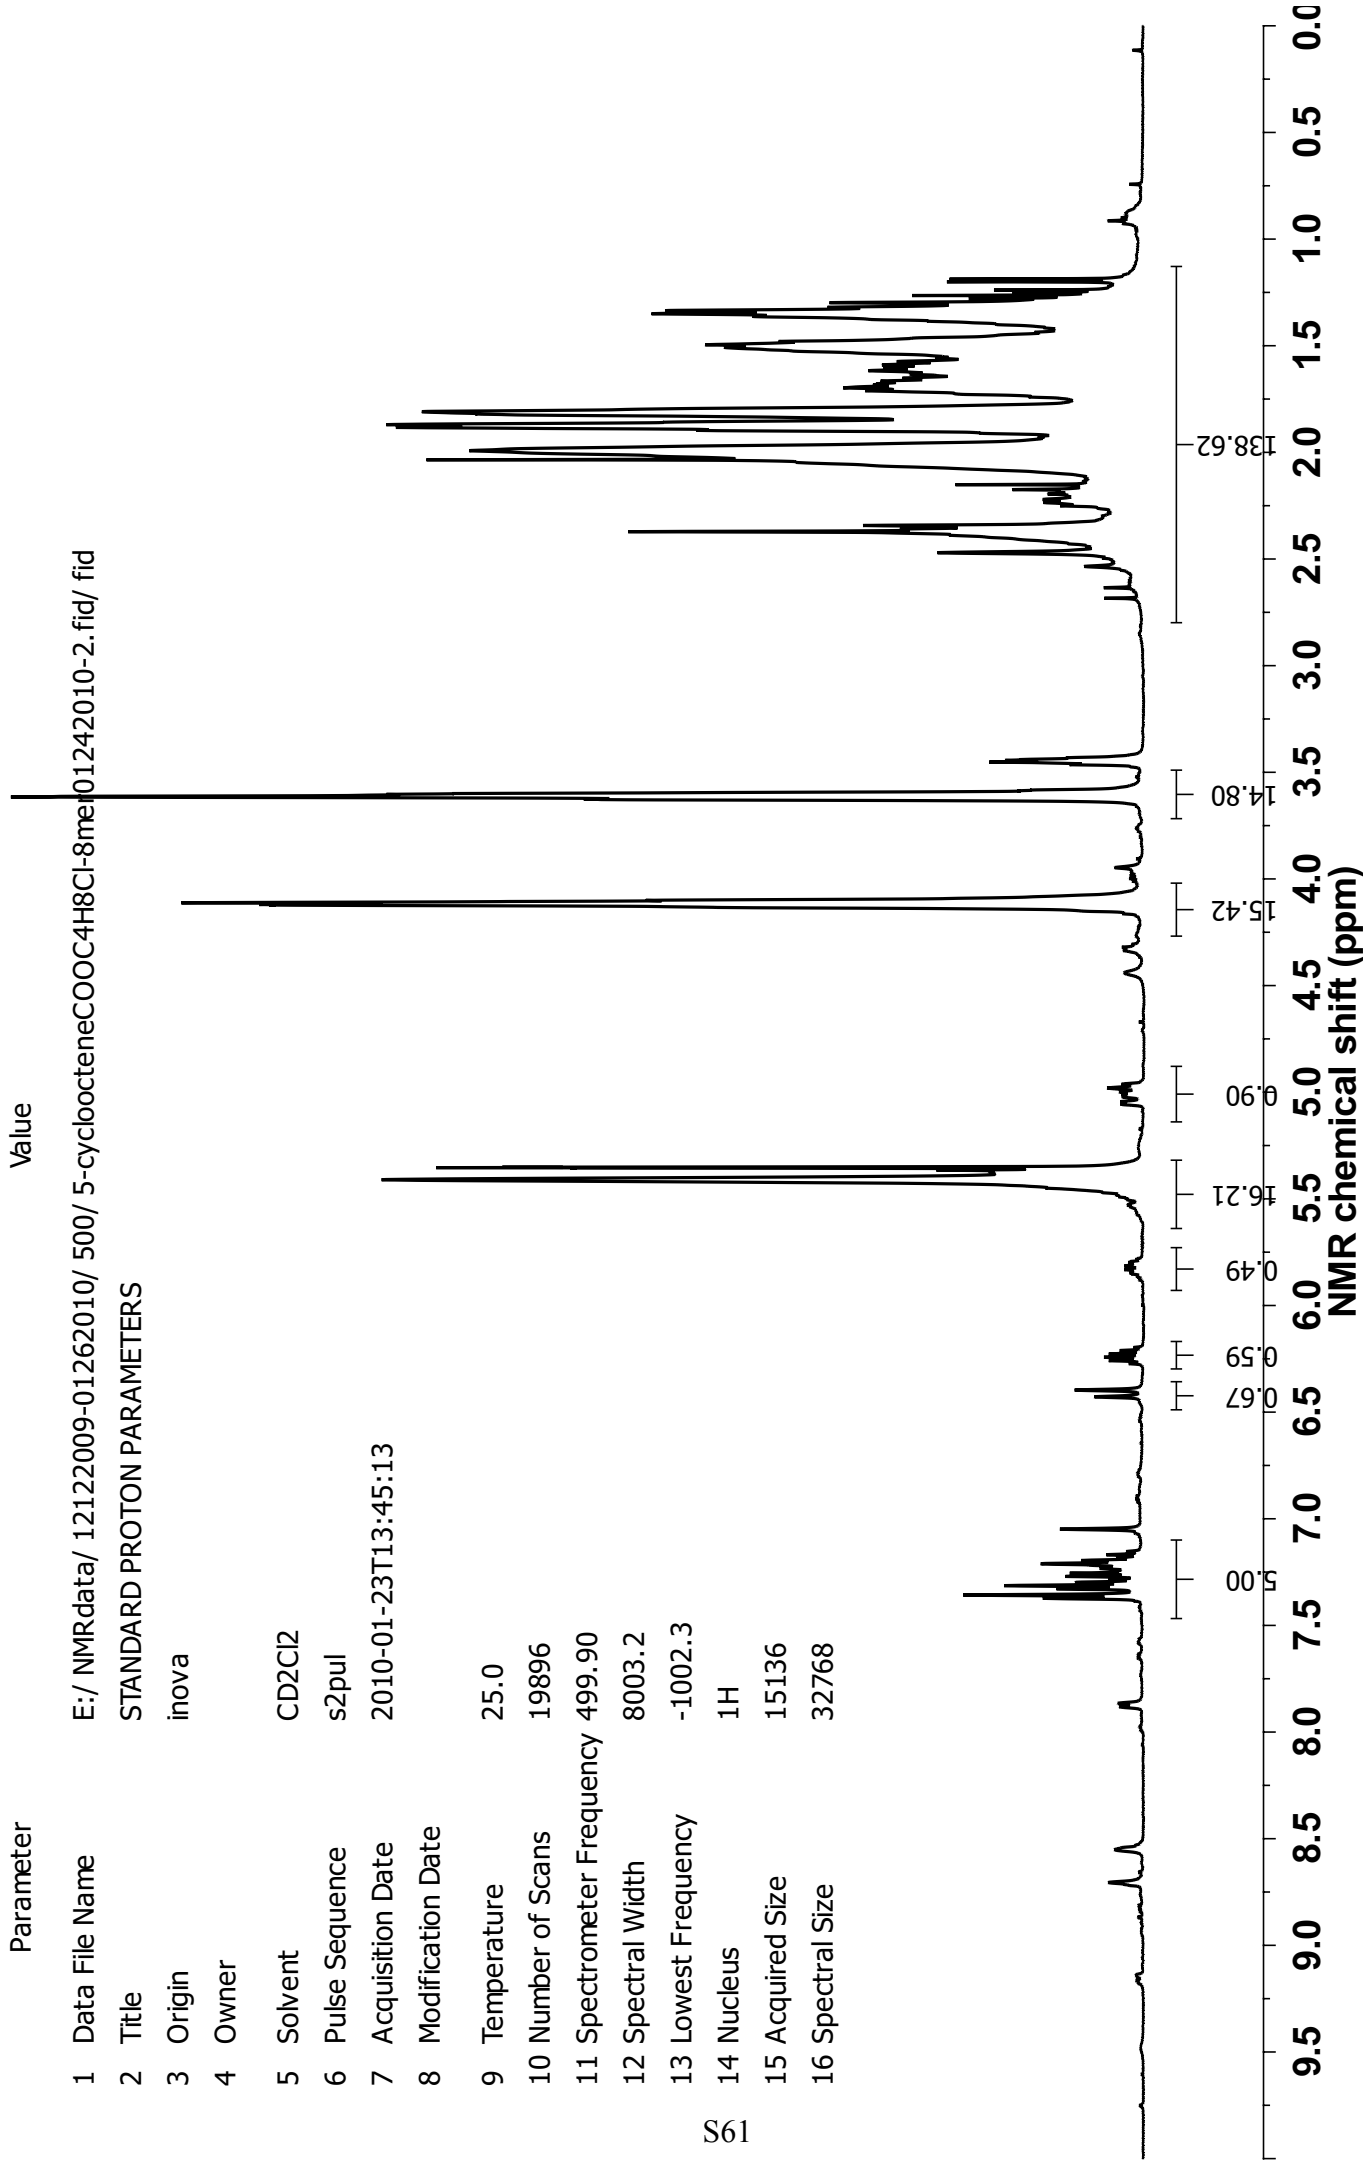

# $^1\text{H}$ -NMR spectrum of Intermediate-14

| Parameter                 | Value                                                                               |
|---------------------------|-------------------------------------------------------------------------------------|
| 1 Data File Name          | E:/ NMRdata/ 12122009-01262010/ 500/ 5-cycloocteneCOOC4H8Cl-C13NMR01242010.fid/ fid |
| 2 Title                   | 5-cycloocteneCOOC4H8Cl-8mer-C13NMR                                                  |
| 3 Origin                  | inova                                                                               |
| 4 Owner                   |                                                                                     |
| 5 Solvent                 | CDCl3                                                                               |
| 6 Pulse Sequence          | s2pul                                                                               |
| 7 Acquisition Date        | 2010-01-24T05:49:02                                                                 |
| 8 Modification Date       |                                                                                     |
| 9 Temperature             | 25.0                                                                                |
| 10 Number of Scans        | 5508                                                                                |
| 11 Spectrometer Frequency | 125.71                                                                              |
| 12 Spectral Width         | 31446.5                                                                             |
| 13 Lowest Frequency       | -2403.1                                                                             |
| 14 Nucleus                | <sup>13</sup> C                                                                     |
| 15 Acquired Size          | 40896                                                                               |
| 16 Spectral Size          | 131072                                                                              |

66

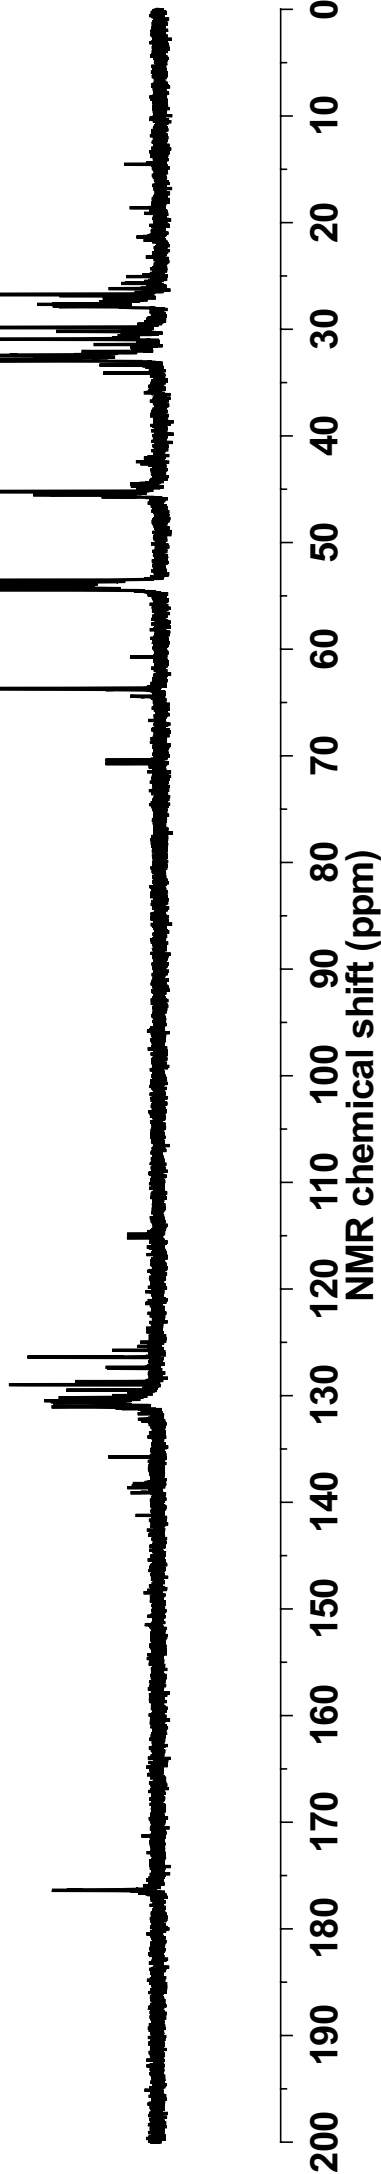

**<sup>13</sup>C-NMR spectrum of Intermediate-14**

Value

| Parameter                 | Value                                                                                  |
|---------------------------|----------------------------------------------------------------------------------------|
| 1 Data File Name          | E:/ NMRdata/ 07112008-07262008/ 600/ CBCOOC4H8NC3H9-cyclohexene-25mer07132008.fid/ fid |
| 2 Title                   | CBCOOC4H8NC3H9-cyclohexene-25mer07132008                                               |
| 3 Origin                  | inova                                                                                  |
| 4 Owner                   |                                                                                        |
| 5 Solvent                 | D2O                                                                                    |
| 6 Pulse Sequence          | s2pul                                                                                  |
| 7 Acquisition Date        | 2008-07-13T07:48:31                                                                    |
| 8 Modification Date       |                                                                                        |
| 9 Temperature             | 25.0                                                                                   |
| 10 Number of Scans        | 64                                                                                     |
| 11 Spectrometer Frequency | 599.72                                                                                 |
| 12 Spectral Width         | 8000.0                                                                                 |
| 13 Lowest Frequency       | -908.4                                                                                 |
| 14 Nucleus                | <sup>1</sup> H                                                                         |
| 15 Acquired Size          | 15136                                                                                  |
| 16 Spectral Size          | 32768                                                                                  |

63

**<sup>1</sup>H-NMR spectrum of Acopolymer-1**

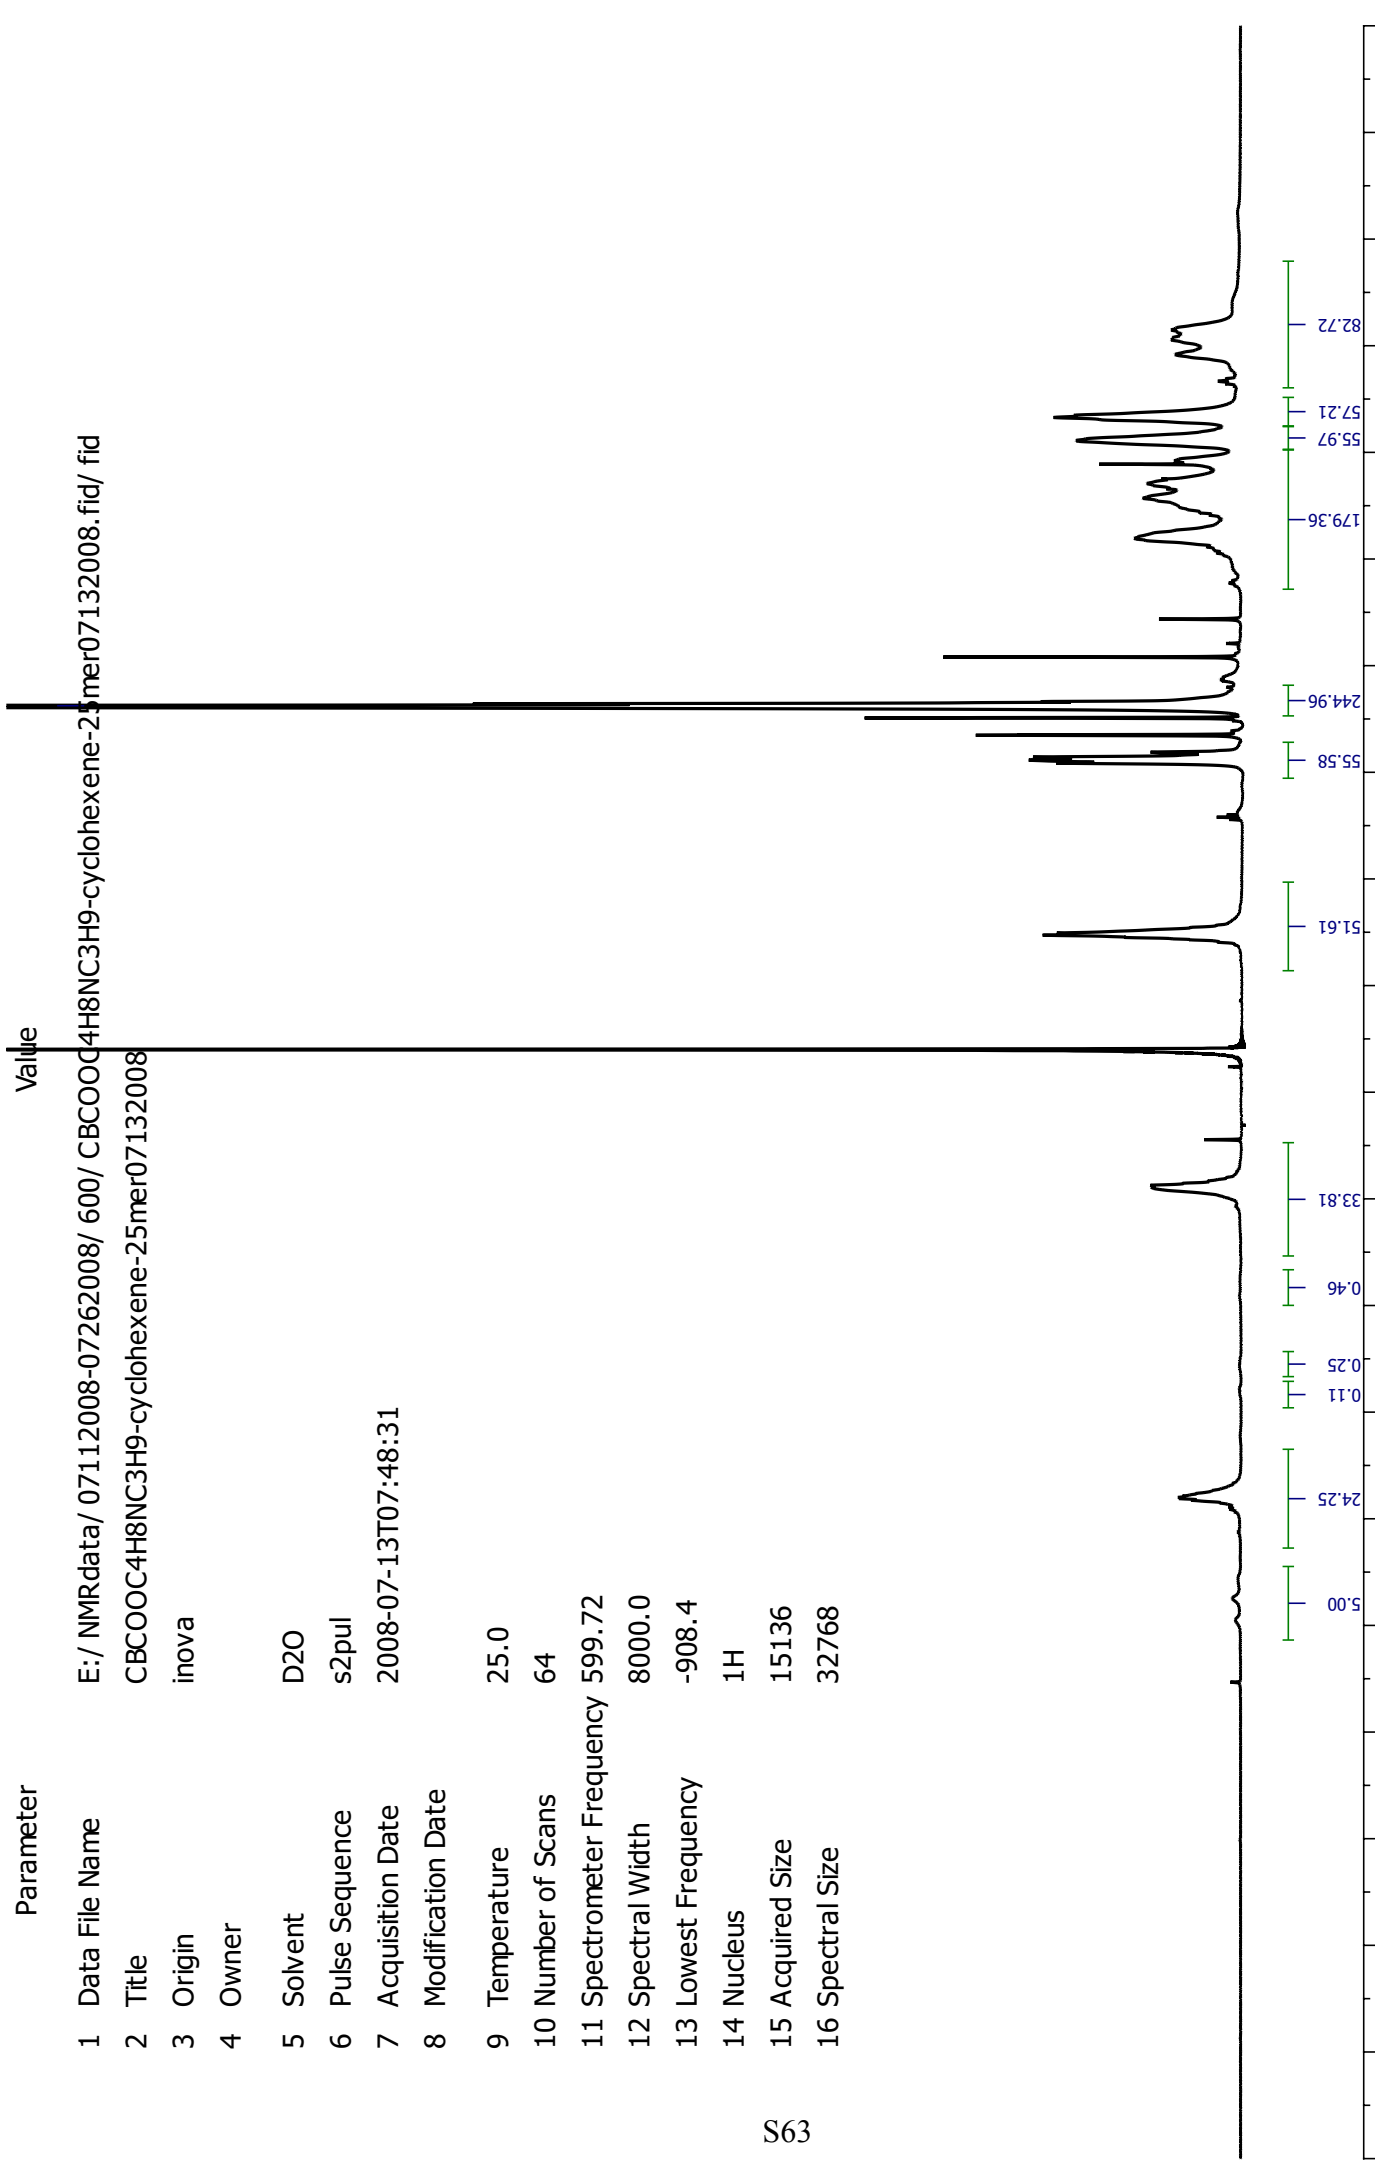

Parameter

Value

1 Data File Name E:/NMRdata/10012008-02172009/600/CBCOOC4H8NCH33-4-methylcyclohexene25mer11062008.fid/ fid  
 2 Title CBCOOC4H8NCH33-4-methylcyclohexene25mer11062008  
 3 Origin inova  
 4 Owner  
 5 Solvent D2O  
 6 Pulse Sequence s2pul  
 7 Acquisition Date 2008-11-06T12:35:00  
 8 Modification Date  
 9 Temperature 25.0  
 10 Number of Scans 40  
 11 Spectrometer Frequency 599.72  
 12 Spectral Width 8000.0  
 13 Lowest Frequency -1001.3  
 14 Nucleus <sup>1</sup>H  
 15 Acquired Size 15136  
 16 Spectral Size 32768

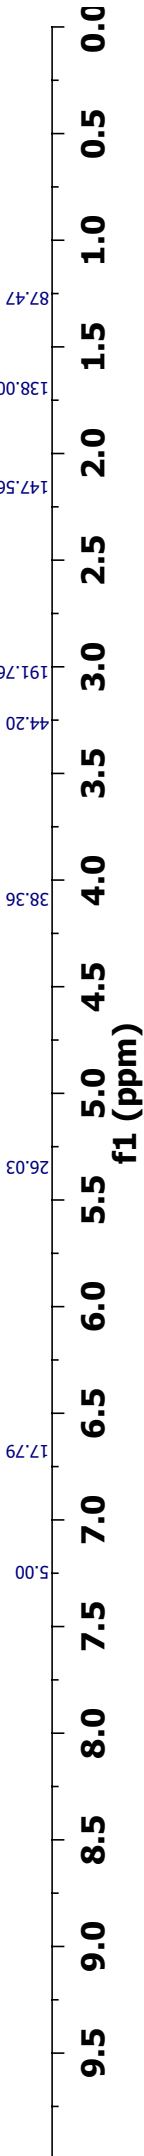

**<sup>1</sup>H-NMR spectrum of Acopolymer-2**



Parameter Value

1 Data File Name E:/ 02222010-02242010/ Polymer-3-02222010.fid/ fid  
2 Title Polymer-3-02222010  
3 Origin inova  
4 Owner  
5 Solvent D2O  
6 Pulse Sequence s2pul  
7 Acquisition Date 2010-02-22T05:40:07  
8 Modification Date  
9 Temperature 25.0  
10 Number of Scans 88  
11 Spectrometer Frequency 599.72  
12 Spectral Width 8000.0  
13 Lowest Frequency -908.0  
14 Nucleus <sup>1</sup>H  
15 Acquired Size 15136  
16 Spectral Size 32768

65

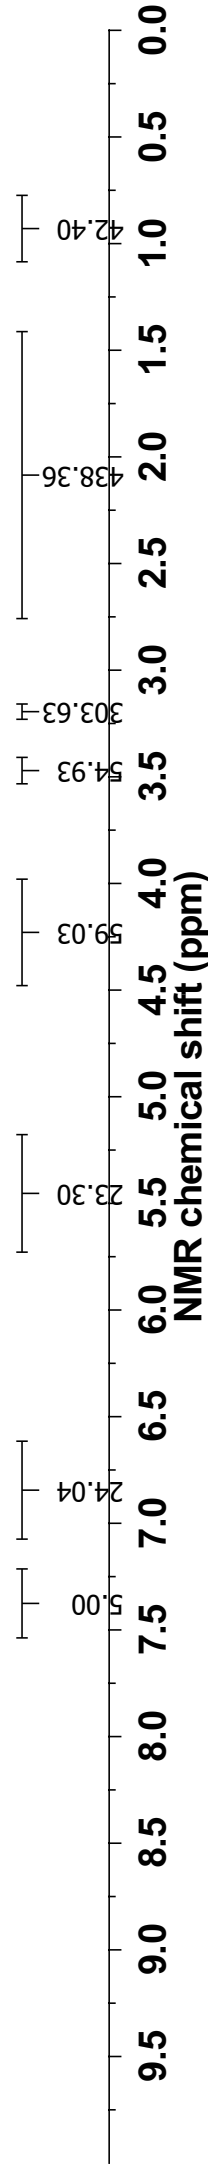

**<sup>1</sup>H-NMR spectrum of Acopolymer-3**

Parameter Value

1 Data File Name E:/ 02222010-02242010/ Polymer-4-02242010.fid/ fid  
2 Title Polymer-4  
3 Origin inova  
4 Owner  
5 Solvent D2O  
6 Pulse Sequence s2pul  
7 Acquisition Date 2010-02-24T04:56:47  
8 Modification Date  
9 Temperature 25.0  
10 Number of Scans 48  
11 Spectrometer Frequency 599.72  
12 Spectral Width 8000.0  
13 Lowest Frequency -909.3  
14 Nucleus <sup>1</sup>H  
15 Acquired Size 15136  
16 Spectral Size 32768

566

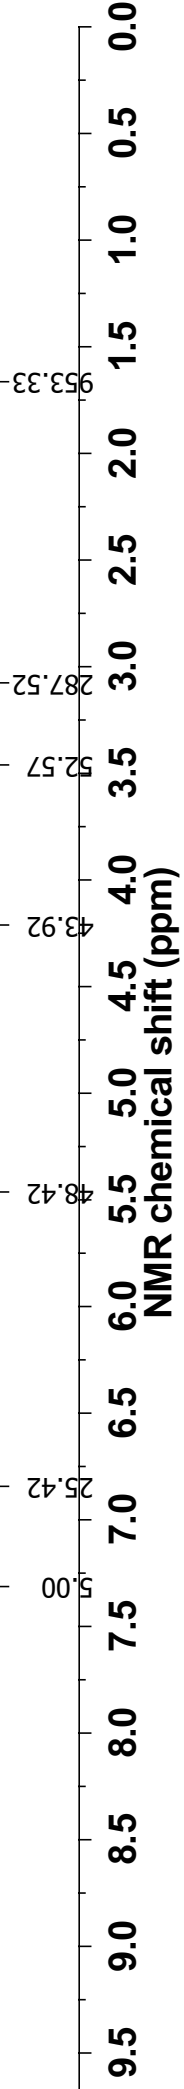

**<sup>1</sup>H-NMR spectrum of Acopolymer-4**

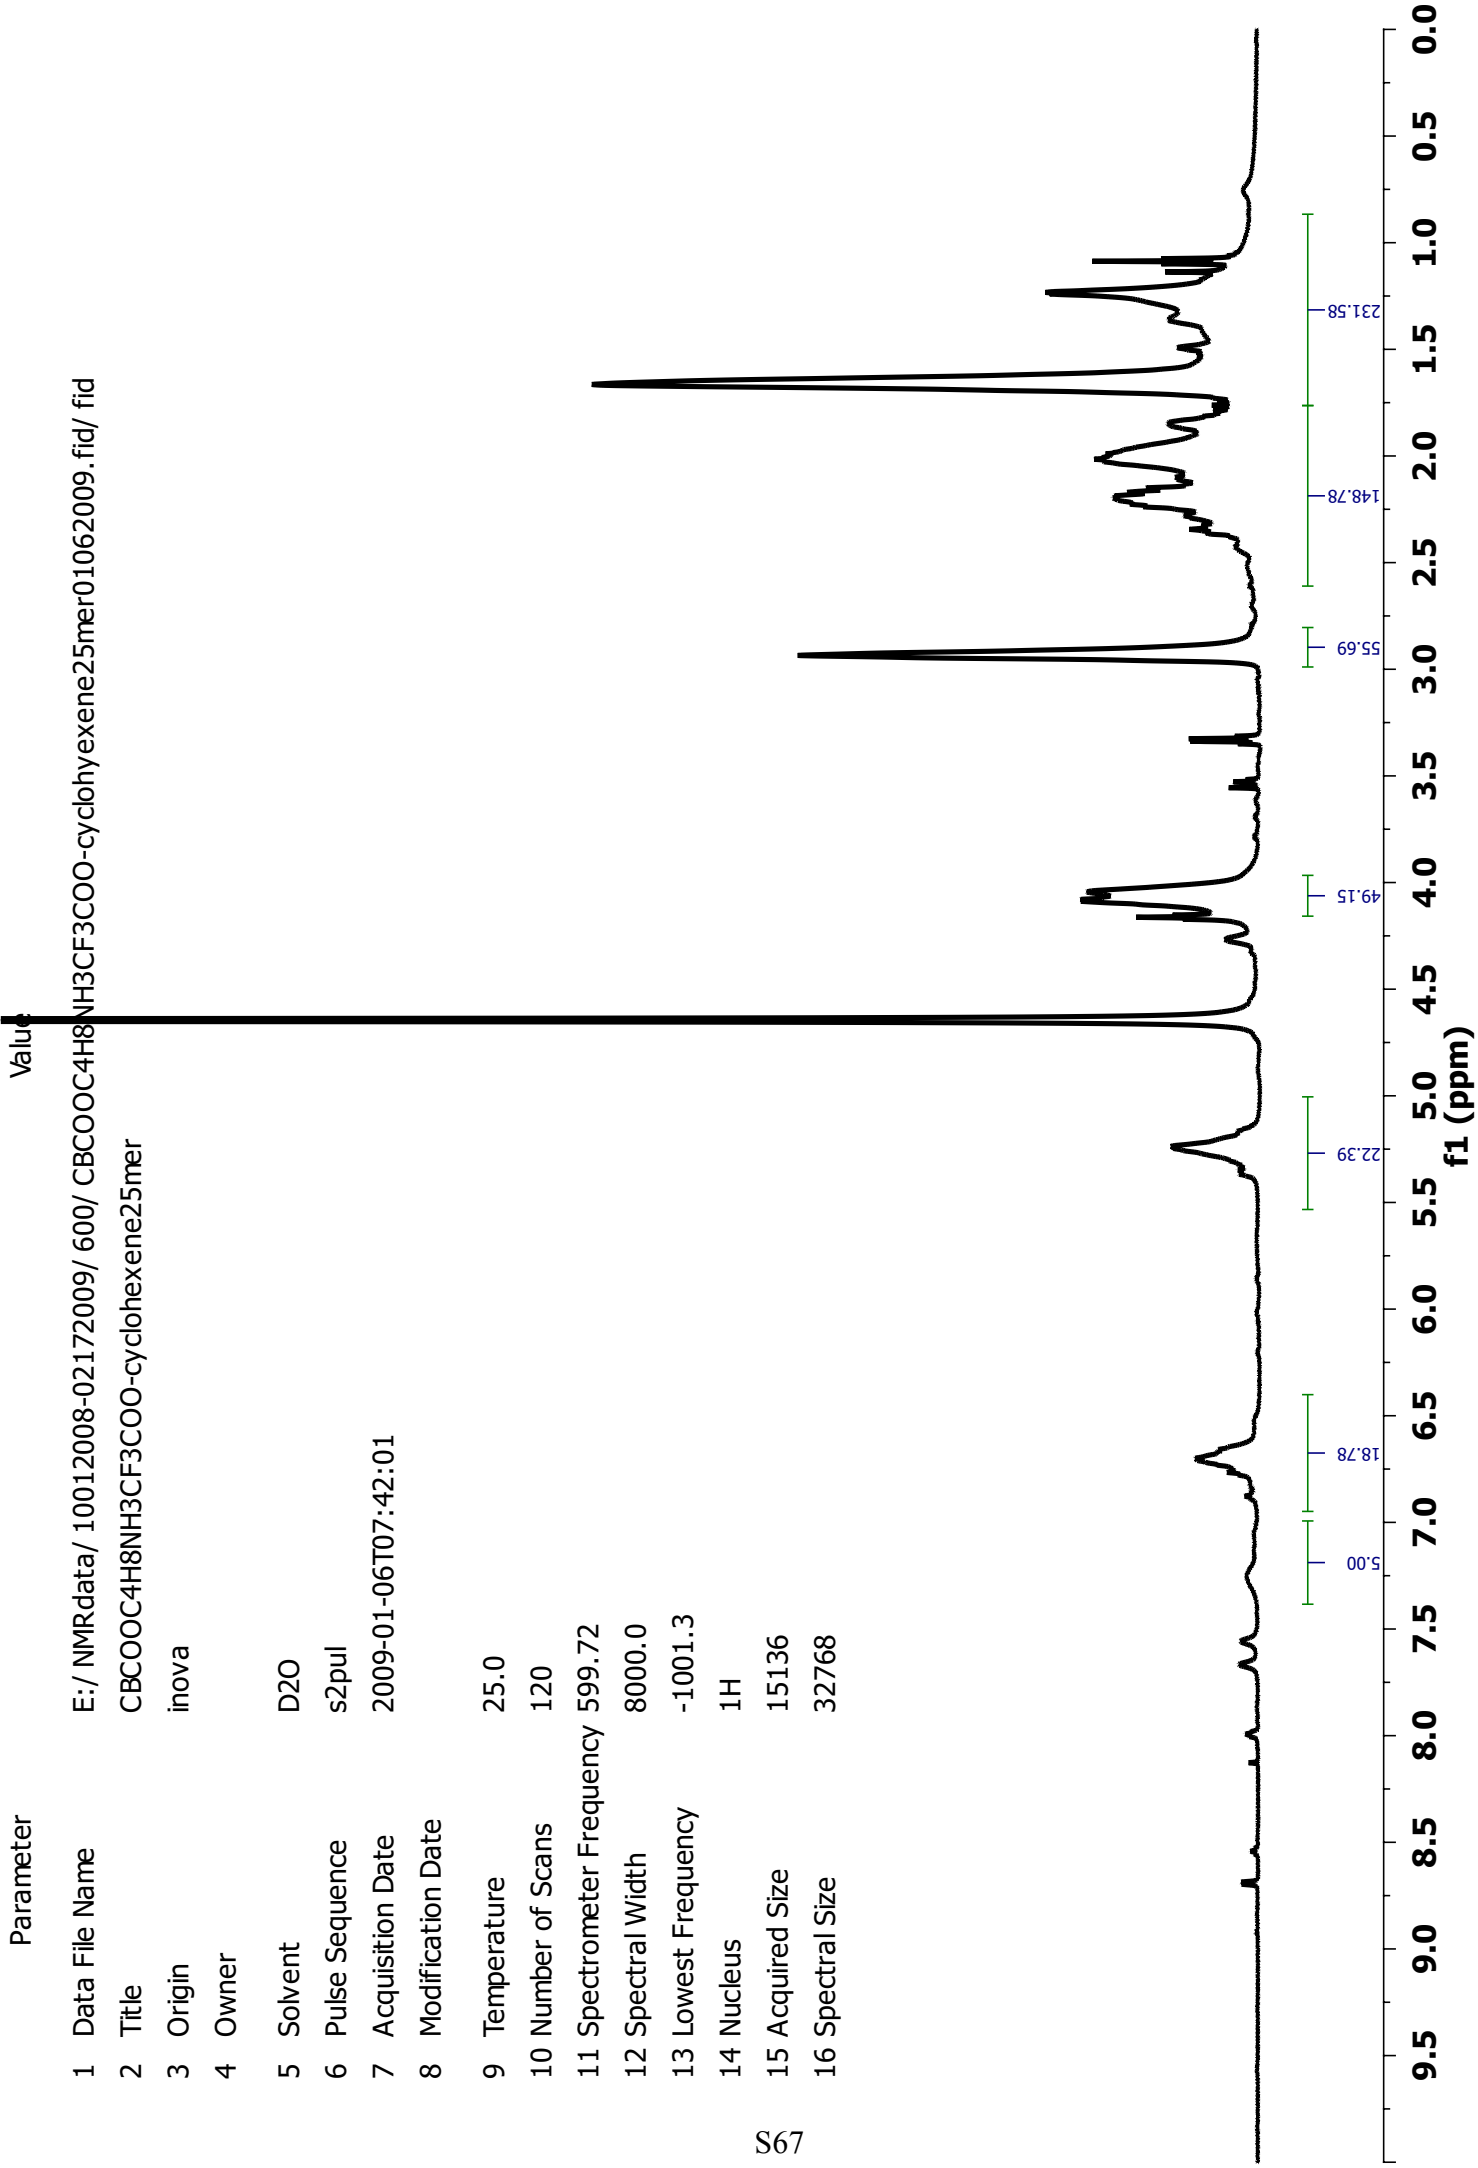

**<sup>1</sup>H-NMR spectrum of Acopolymer-6**

| Parameter                 | Value                                                                                     |
|---------------------------|-------------------------------------------------------------------------------------------|
| 1 Data File Name          | E:/ NMRdata/ 10012008-02172009/ 600/ CBCOOC4H8NH3CF3COO-cyclohexene25mer01062009.fid/ fid |
| 2 Title                   | CBCOOC4H8NH3CF3COO-cyclohexene25mer                                                       |
| 3 Origin                  | inova                                                                                     |
| 4 Owner                   |                                                                                           |
| 5 Solvent                 | D2O                                                                                       |
| 6 Pulse Sequence          | s2pul                                                                                     |
| 7 Acquisition Date        | 2009-01-06T07:42:01                                                                       |
| 8 Modification Date       |                                                                                           |
| 9 Temperature             | 25.0                                                                                      |
| 10 Number of Scans        | 120                                                                                       |
| 11 Spectrometer Frequency | 599.72                                                                                    |
| 12 Spectral Width         | 8000.0                                                                                    |
| 13 Lowest Frequency       | -1001.3                                                                                   |
| 14 Nucleus                | 1H                                                                                        |
| 15 Acquired Size          | 15136                                                                                     |
| 16 Spectral Size          | 32768                                                                                     |

Parameter Value

1 Data File Name E:/NMRdata/02182009-09172009/600/CBCOOC2H4N=CNH32-cyclohexene25mer03262009.fid/ fid  
2 Title CBCOOC2H4N=CNH32-cyclohexene25mer03262009  
3 Origin inova  
4 Owner  
5 Solvent D2O  
6 Pulse Sequence s2pul  
7 Acquisition Date 2009-03-26T06:16:12  
8 Modification Date  
9 Temperature 25.0  
10 Number of Scans 72  
11 Spectrometer Frequency 599.72  
12 Spectral Width 8000.0  
13 Lowest Frequency -908.6  
14 Nucleus <sup>1</sup>H  
15 Acquired Size 15136  
16 Spectral Size 32768

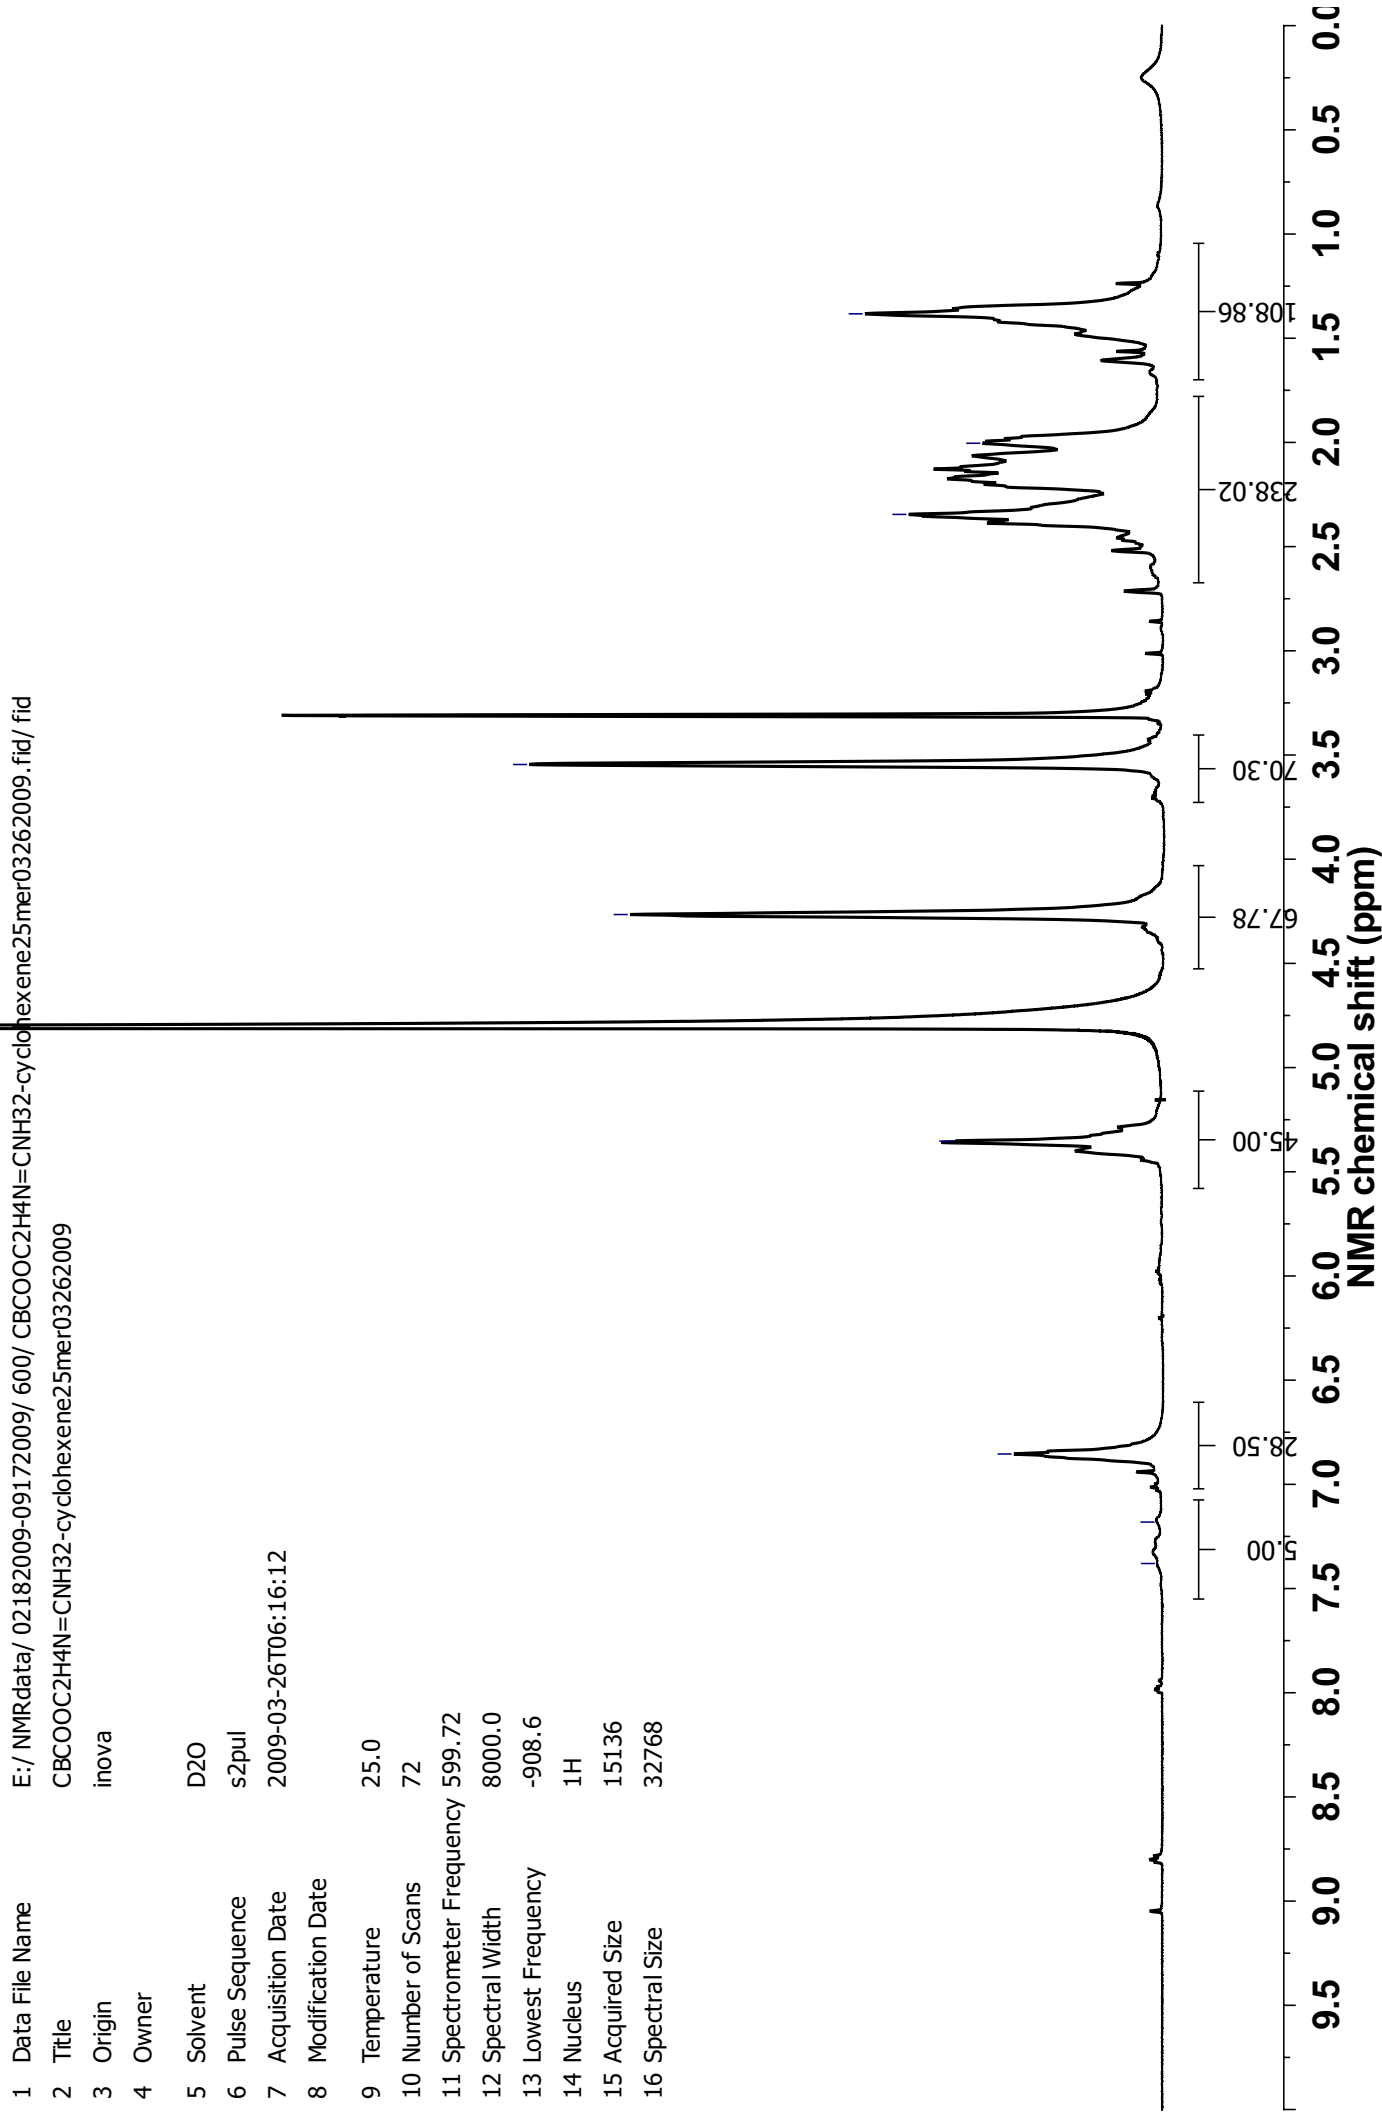

# <sup>1</sup>H-NMR spectrum of Acopolymer-7

| Parameter                 | Value                                              |
|---------------------------|----------------------------------------------------|
| 1 Data File Name          | E:/ 02222010-02242010/ Polymer-8-02242010.fid/ fid |
| 2 Title                   | Polymer-8                                          |
| 3 Origin                  | inova                                              |
| 4 Owner                   |                                                    |
| 5 Solvent                 | D2O                                                |
| 6 Pulse Sequence          | s2pul                                              |
| 7 Acquisition Date        | 2010-02-24T05:11:20                                |
| 8 Modification Date       |                                                    |
| 9 Temperature             | 25.0                                               |
| 10 Number of Scans        | 64                                                 |
| 11 Spectrometer Frequency | 599.72                                             |
| 12 Spectral Width         | 8000.0                                             |
| 13 Lowest Frequency       | -908.5                                             |
| 14 Nucleus                | <sup>1</sup> H                                     |
| 15 Acquired Size          | 15136                                              |
| 16 Spectral Size          | 32768                                              |

69

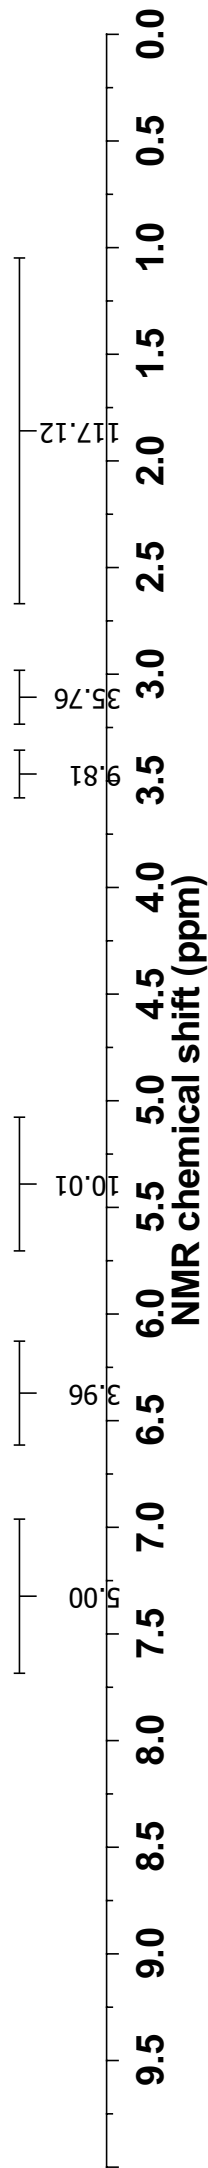

**A-110: <sup>1</sup>H-NMR spectrum of Rcopolymer-8**

Parameter

Value

|    |                        |                                                    |
|----|------------------------|----------------------------------------------------|
| 1  | Data File Name         | E:/ 02222010-02242010/ Polymer-9-02242010.fid/ fid |
| 2  | Title                  | Polymer-9                                          |
| 3  | Origin                 | inova                                              |
| 4  | Owner                  |                                                    |
| 5  | Solvent                | D2O                                                |
| 6  | Pulse Sequence         | s2pul                                              |
| 7  | Acquisition Date       | 2010-02-24T05:17:30                                |
| 8  | Modification Date      |                                                    |
| 9  | Temperature            | 25.0                                               |
| 10 | Number of Scans        | 72                                                 |
| 11 | Spectrometer Frequency | 599.72                                             |
| 12 | Spectral Width         | 8000.0                                             |
| 13 | Lowest Frequency       | -907.5                                             |
| 14 | Nucleus                | <sup>1</sup> H                                     |
| 15 | Acquired Size          | 15136                                              |
| 16 | Spectral Size          | 32768                                              |

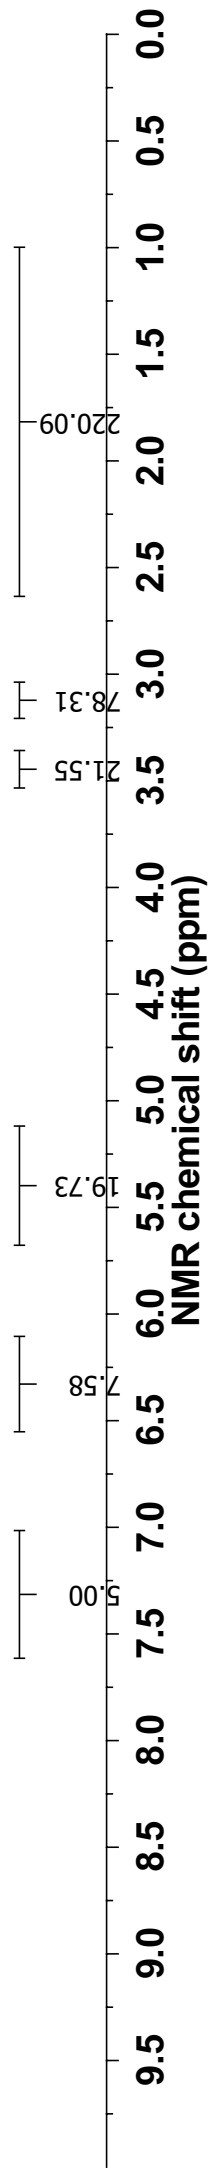

# <sup>1</sup>H-NMR spectrum of Recopolymer-9

Parameter Value

1 Data File Name E:/02222010-02242010/ Polymer-10-02242010.fid/ fid  
2 Title Polymer-10  
3 Origin inova  
4 Owner  
5 Solvent D2O  
6 Pulse Sequence s2pul  
7 Acquisition Date 2010-02-24T05:24:14  
8 Modification Date  
9 Temperature 25.0  
10 Number of Scans 40  
11 Spectrometer Frequency 599.72  
12 Spectral Width 8000.0  
13 Lowest Frequency -908.0  
14 Nucleus <sup>1</sup>H  
15 Acquired Size 15136  
16 Spectral Size 32768

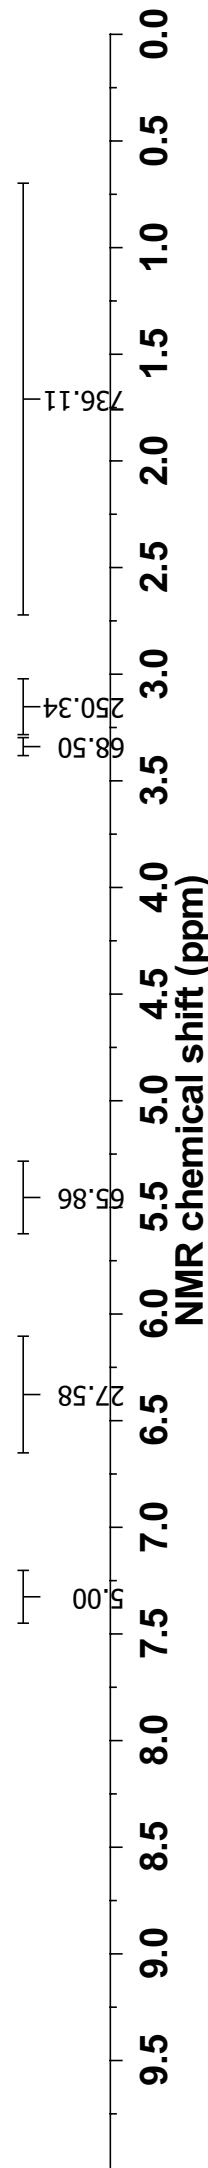

# <sup>1</sup>H-NMR spectrum of Rcopolymer-10

| Parameter                 | Value                                              |
|---------------------------|----------------------------------------------------|
| 1 Data File Name          | E:/ 01272010-02062010/ Polymer11-02062010.fid/ fid |
| 2 Title                   | Polymer-11                                         |
| 3 Origin                  | inova                                              |
| 4 Owner                   |                                                    |
| 5 Solvent                 | D2O                                                |
| 6 Pulse Sequence          | s2pul                                              |
| 7 Acquisition Date        | 2010-02-06T07:25:55                                |
| 8 Modification Date       |                                                    |
| 9 Temperature             | 25.0                                               |
| 10 Number of Scans        | 16                                                 |
| 11 Spectrometer Frequency | 599.72                                             |
| 12 Spectral Width         | 8000.0                                             |
| 13 Lowest Frequency       | -915.6                                             |
| 14 Nucleus                | <sup>1</sup> H                                     |
| 15 Acquired Size          | 15136                                              |
| 16 Spectral Size          | 32768                                              |

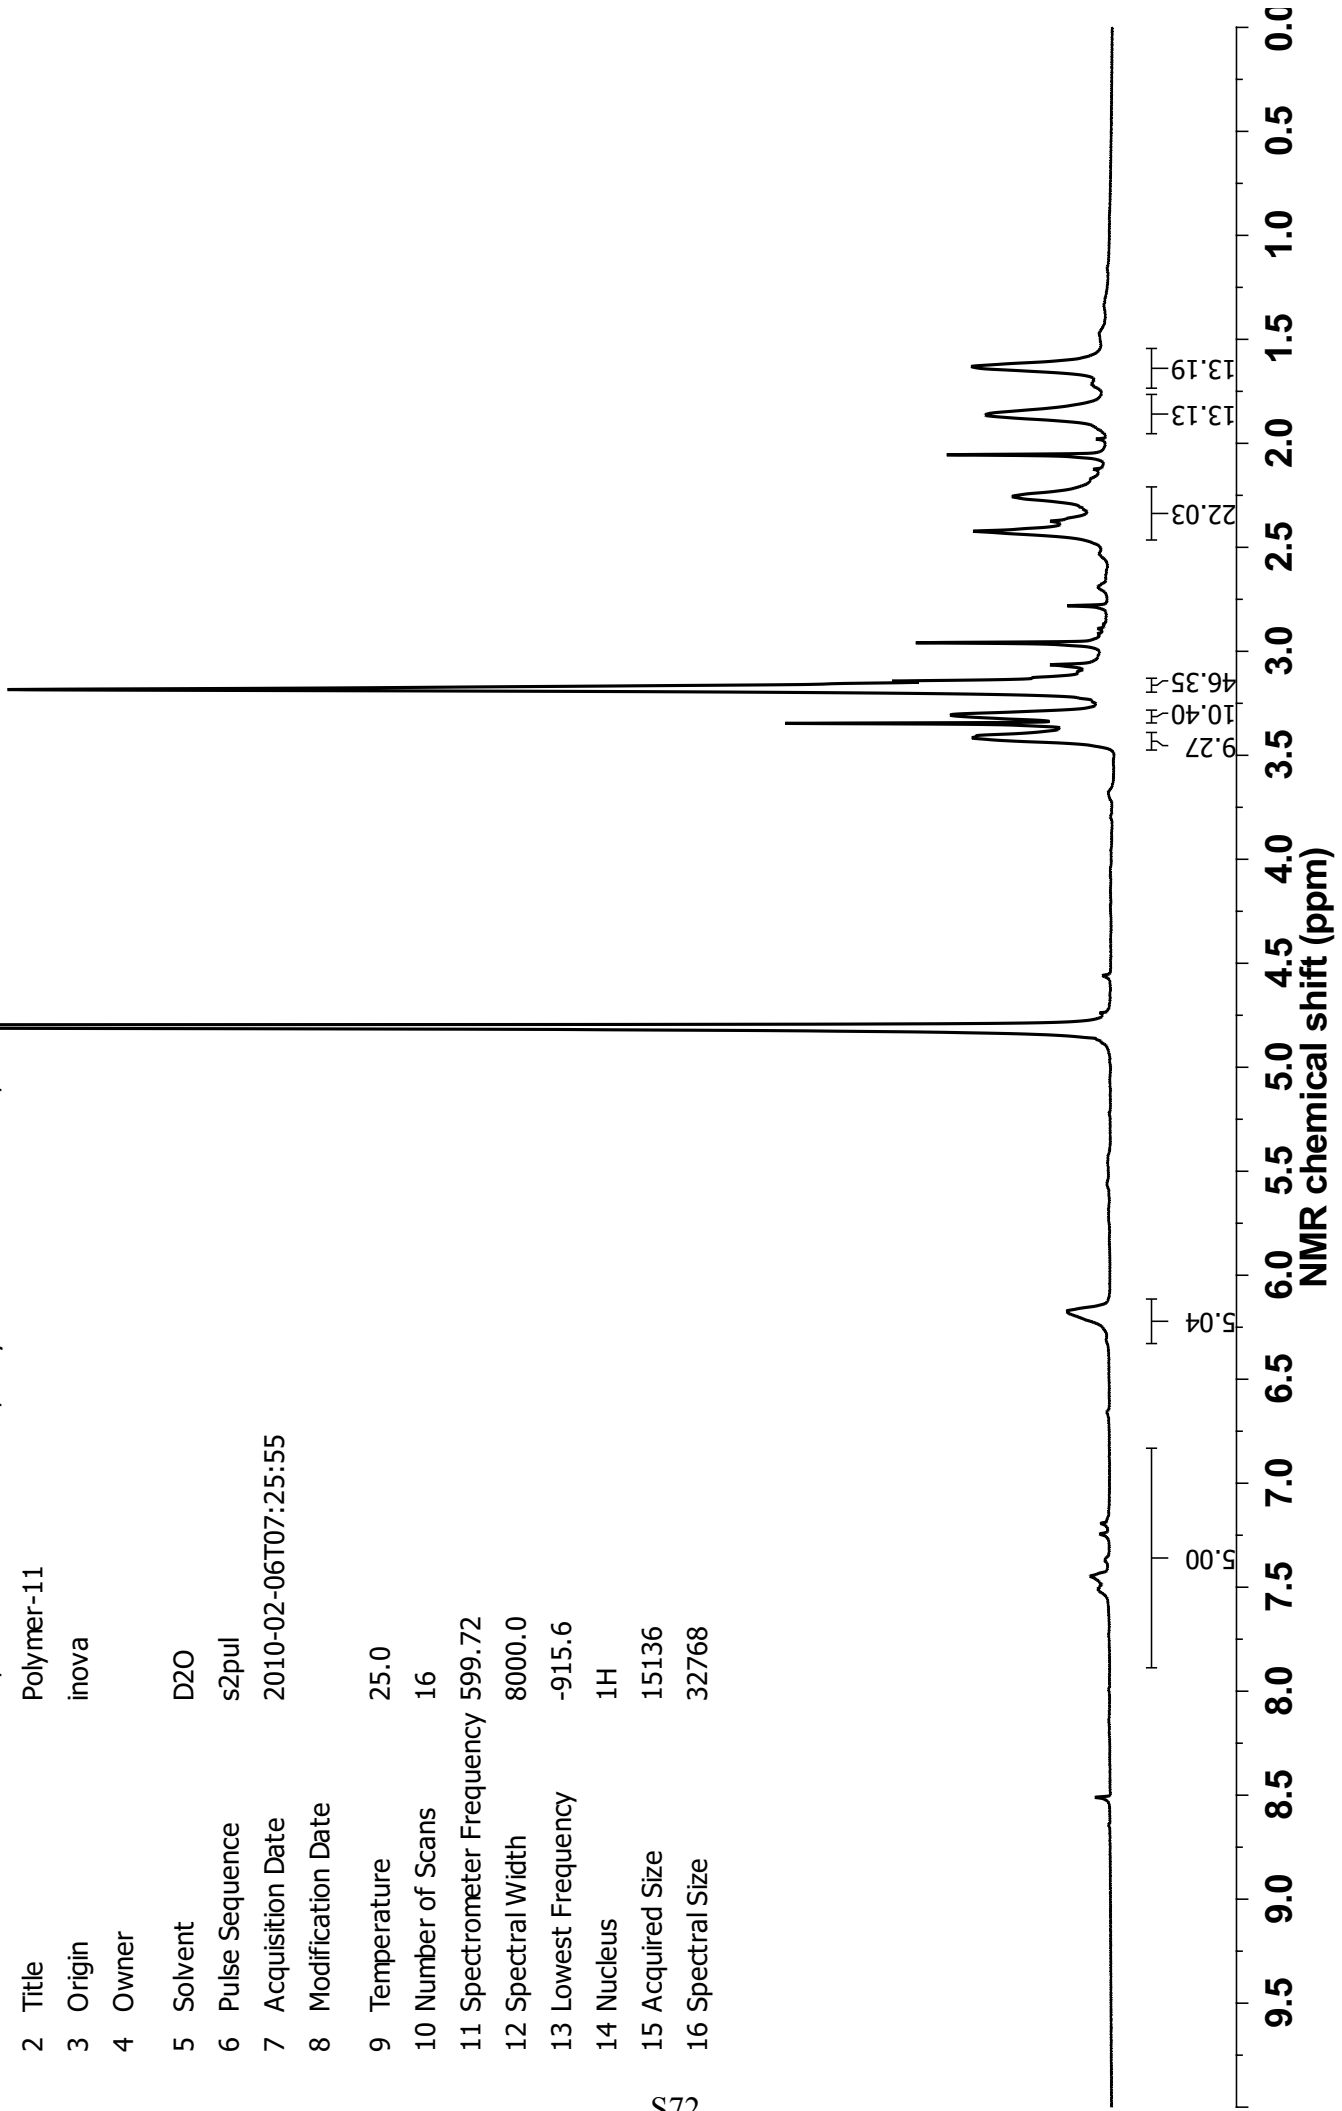

# <sup>1</sup>H-NMR spectrum of Homopolymer-11



Parameter

Value

|    |                        |                                                    |
|----|------------------------|----------------------------------------------------|
| 1  | Data File Name         | E:/ 01272010-02062010/ Polymer-1202052010.fid/ fid |
| 2  | Title                  | polymer-12                                         |
| 3  | Origin                 | inova                                              |
| 4  | Owner                  |                                                    |
| 5  | Solvent                | D2O                                                |
| 6  | Pulse Sequence         | s2pul                                              |
| 7  | Acquisition Date       | 2010-02-06T07:19:31                                |
| 8  | Modification Date      |                                                    |
| 9  | Temperature            | 25.0                                               |
| 10 | Number of Scans        | 48                                                 |
| 11 | Spectrometer Frequency | 599.72                                             |
| 12 | Spectral Width         | 8000.0                                             |
| 13 | Lowest Frequency       | -921.5                                             |
| 14 | Nucleus                | <sup>1</sup> H                                     |
| 15 | Acquired Size          | 15136                                              |
| 16 | Spectral Size          | 32768                                              |

S73

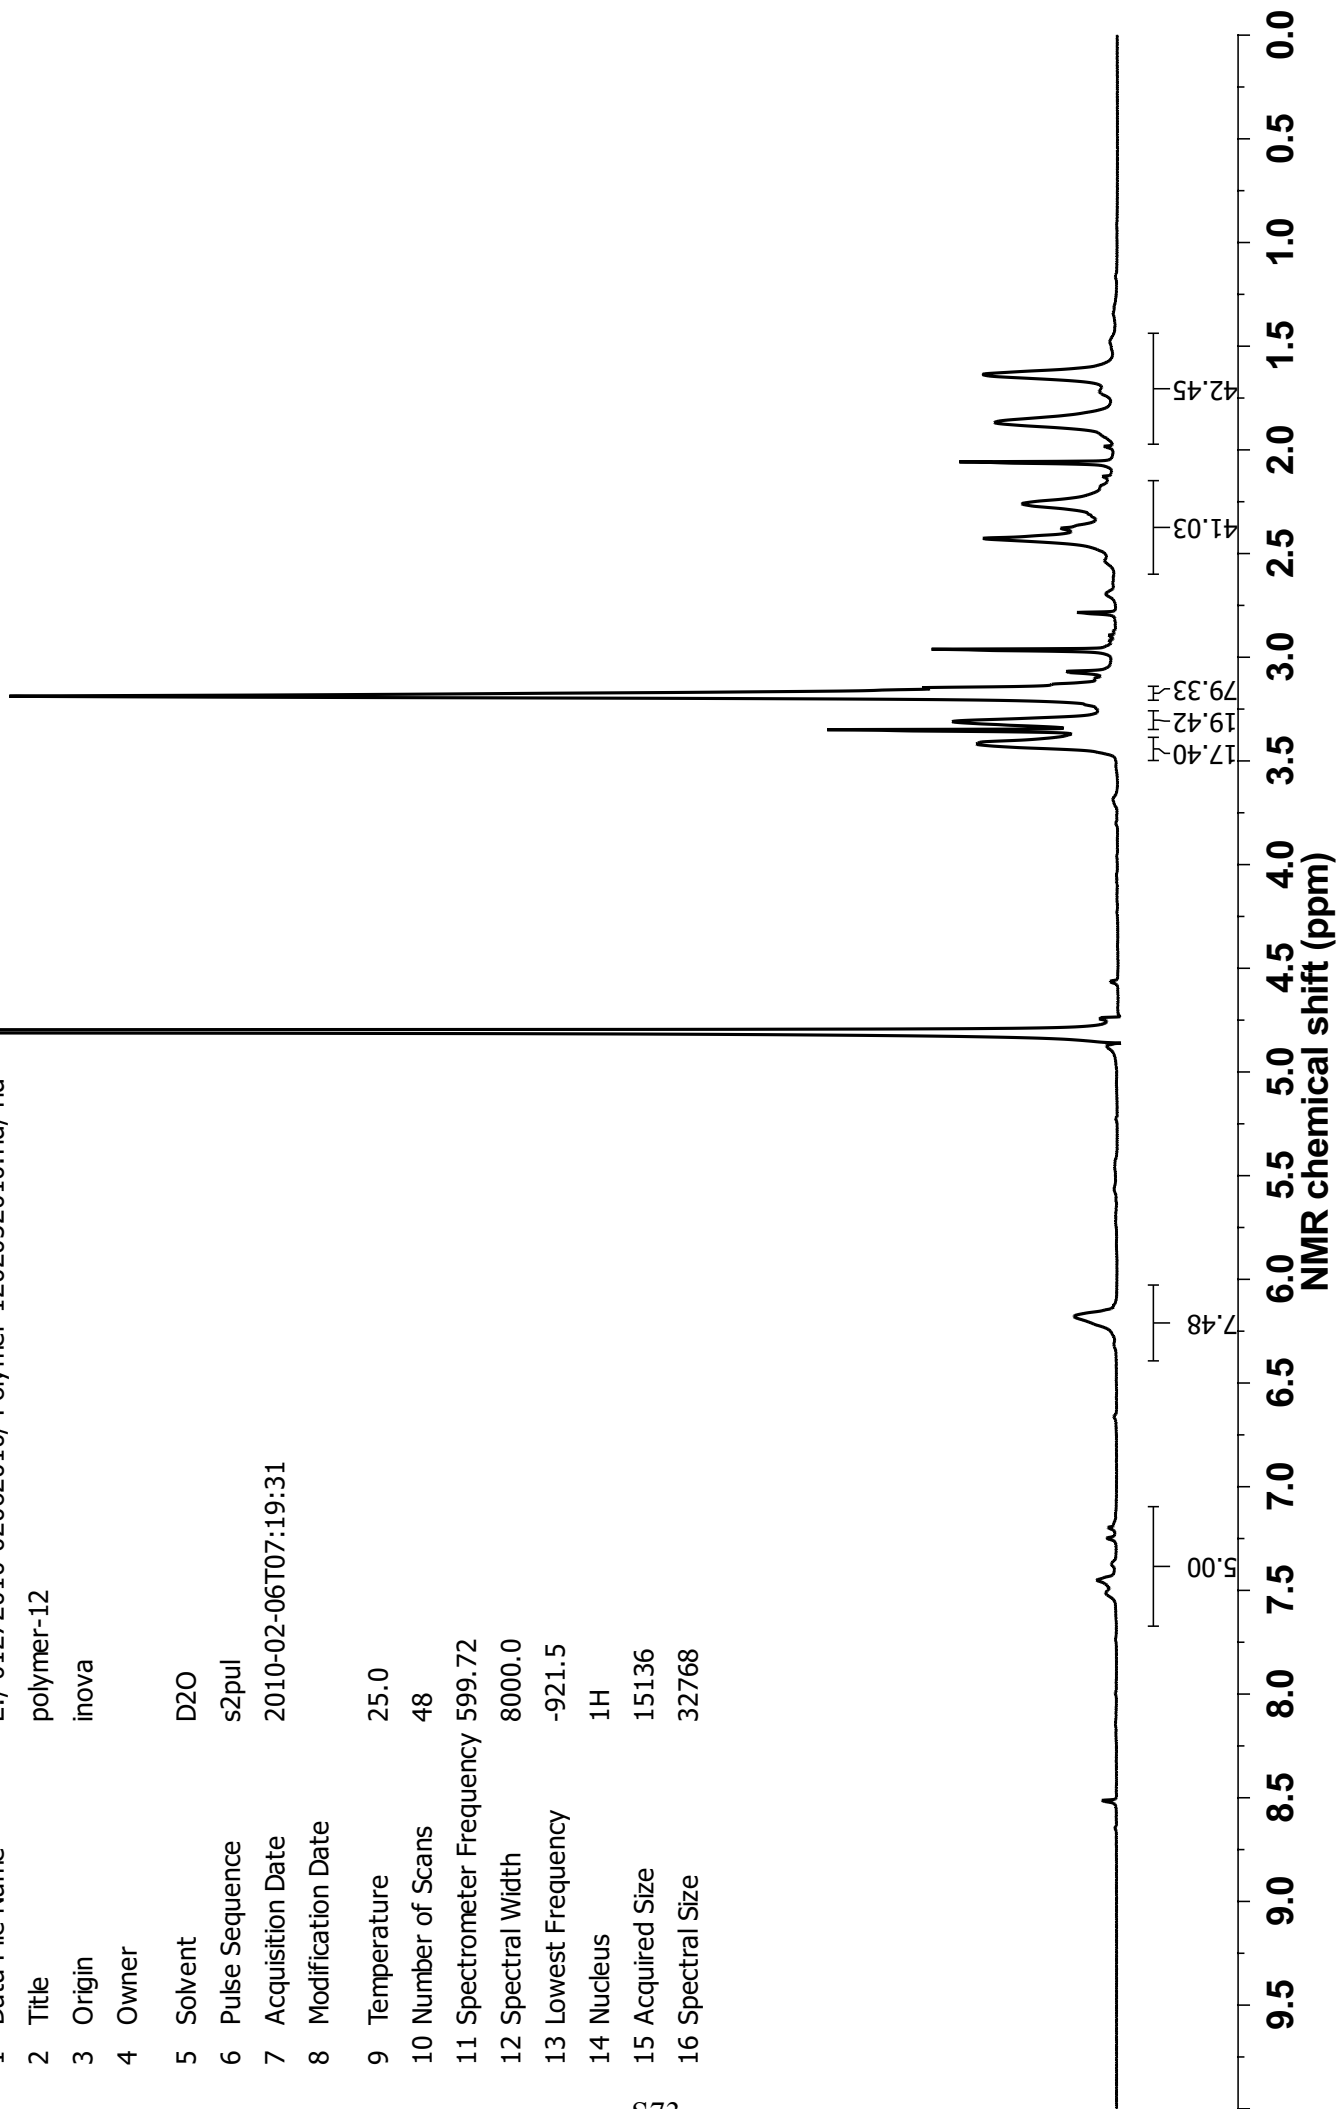

**<sup>1</sup>H-NMR spectrum of Homopolymer-12**

| Parameter                 | Value                                                                          |
|---------------------------|--------------------------------------------------------------------------------|
| 1 Data File Name          | E:/ NMRdata/ 12122009-01262010/ 5-cycloocteneCOOC4H8NMe3-4mer01252010.fid/ fid |
| 2 Title                   | 5-cycloocteneCOOC4H8NMe3-4mer                                                  |
| 3 Origin                  | inova                                                                          |
| 4 Owner                   |                                                                                |
| 5 Solvent                 | D2O                                                                            |
| 6 Pulse Sequence          | s2pul                                                                          |
| 7 Acquisition Date        | 2010-01-25T08:28:49                                                            |
| 8 Modification Date       |                                                                                |
| 9 Temperature             | 25.0                                                                           |
| 10 Number of Scans        | 104                                                                            |
| 11 Spectrometer Frequency | 599.72                                                                         |
| 12 Spectral Width         | 8000.0                                                                         |
| 13 Lowest Frequency       | -910.9                                                                         |
| 14 Nucleus                | <sup>1</sup> H                                                                 |
| 15 Acquired Size          | 15136                                                                          |
| 16 Spectral Size          | 32768                                                                          |

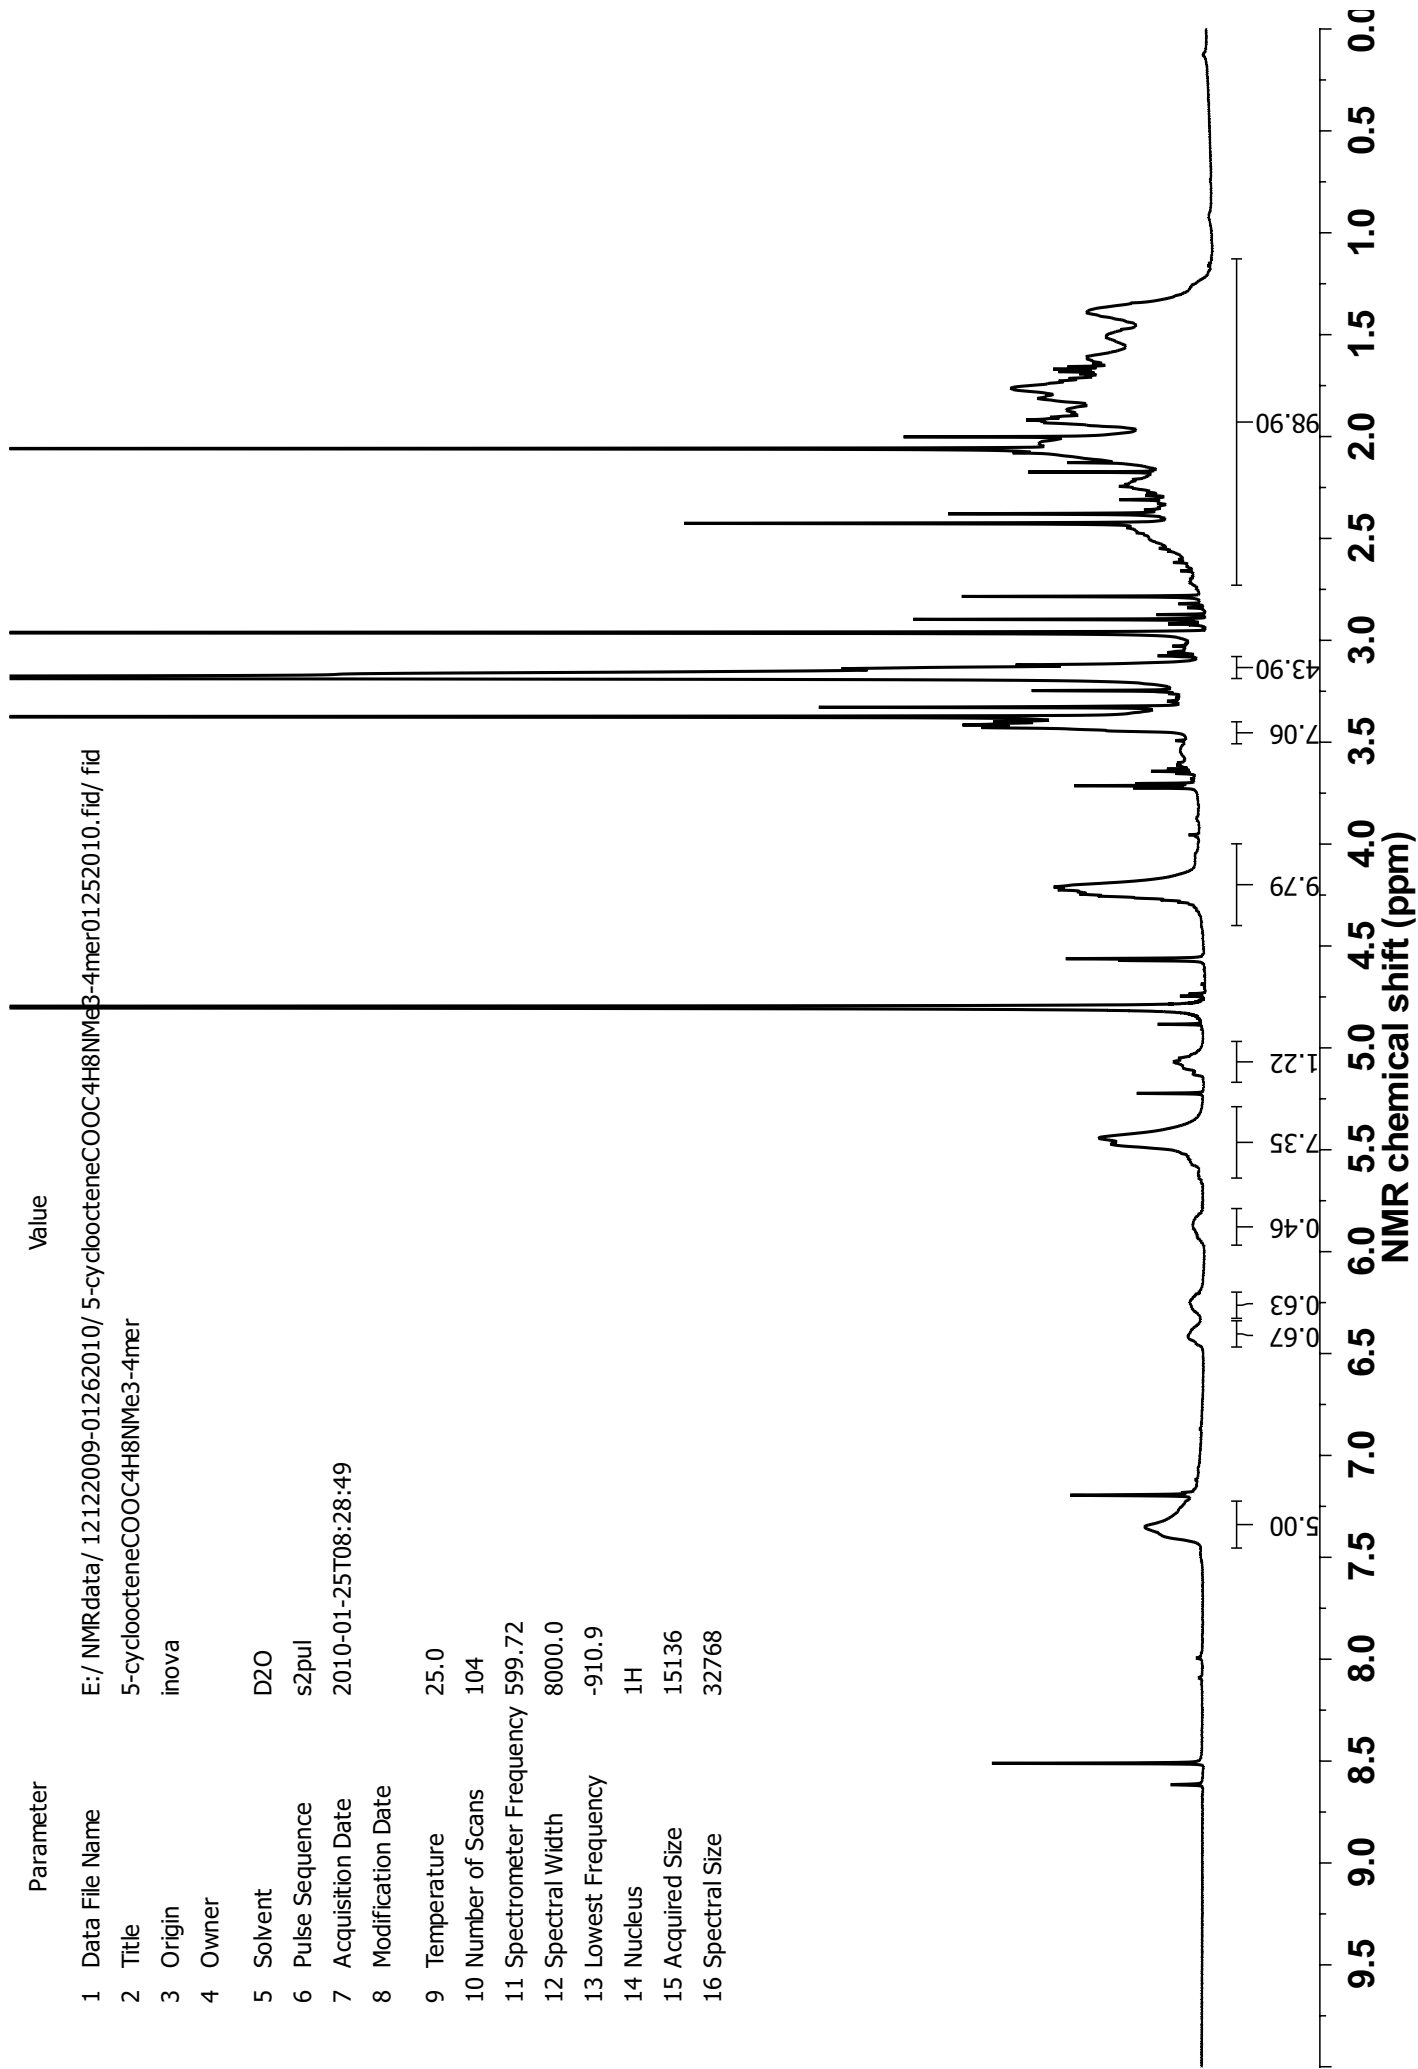

**<sup>1</sup>H-NMR spectrum of Homopolymer-13**

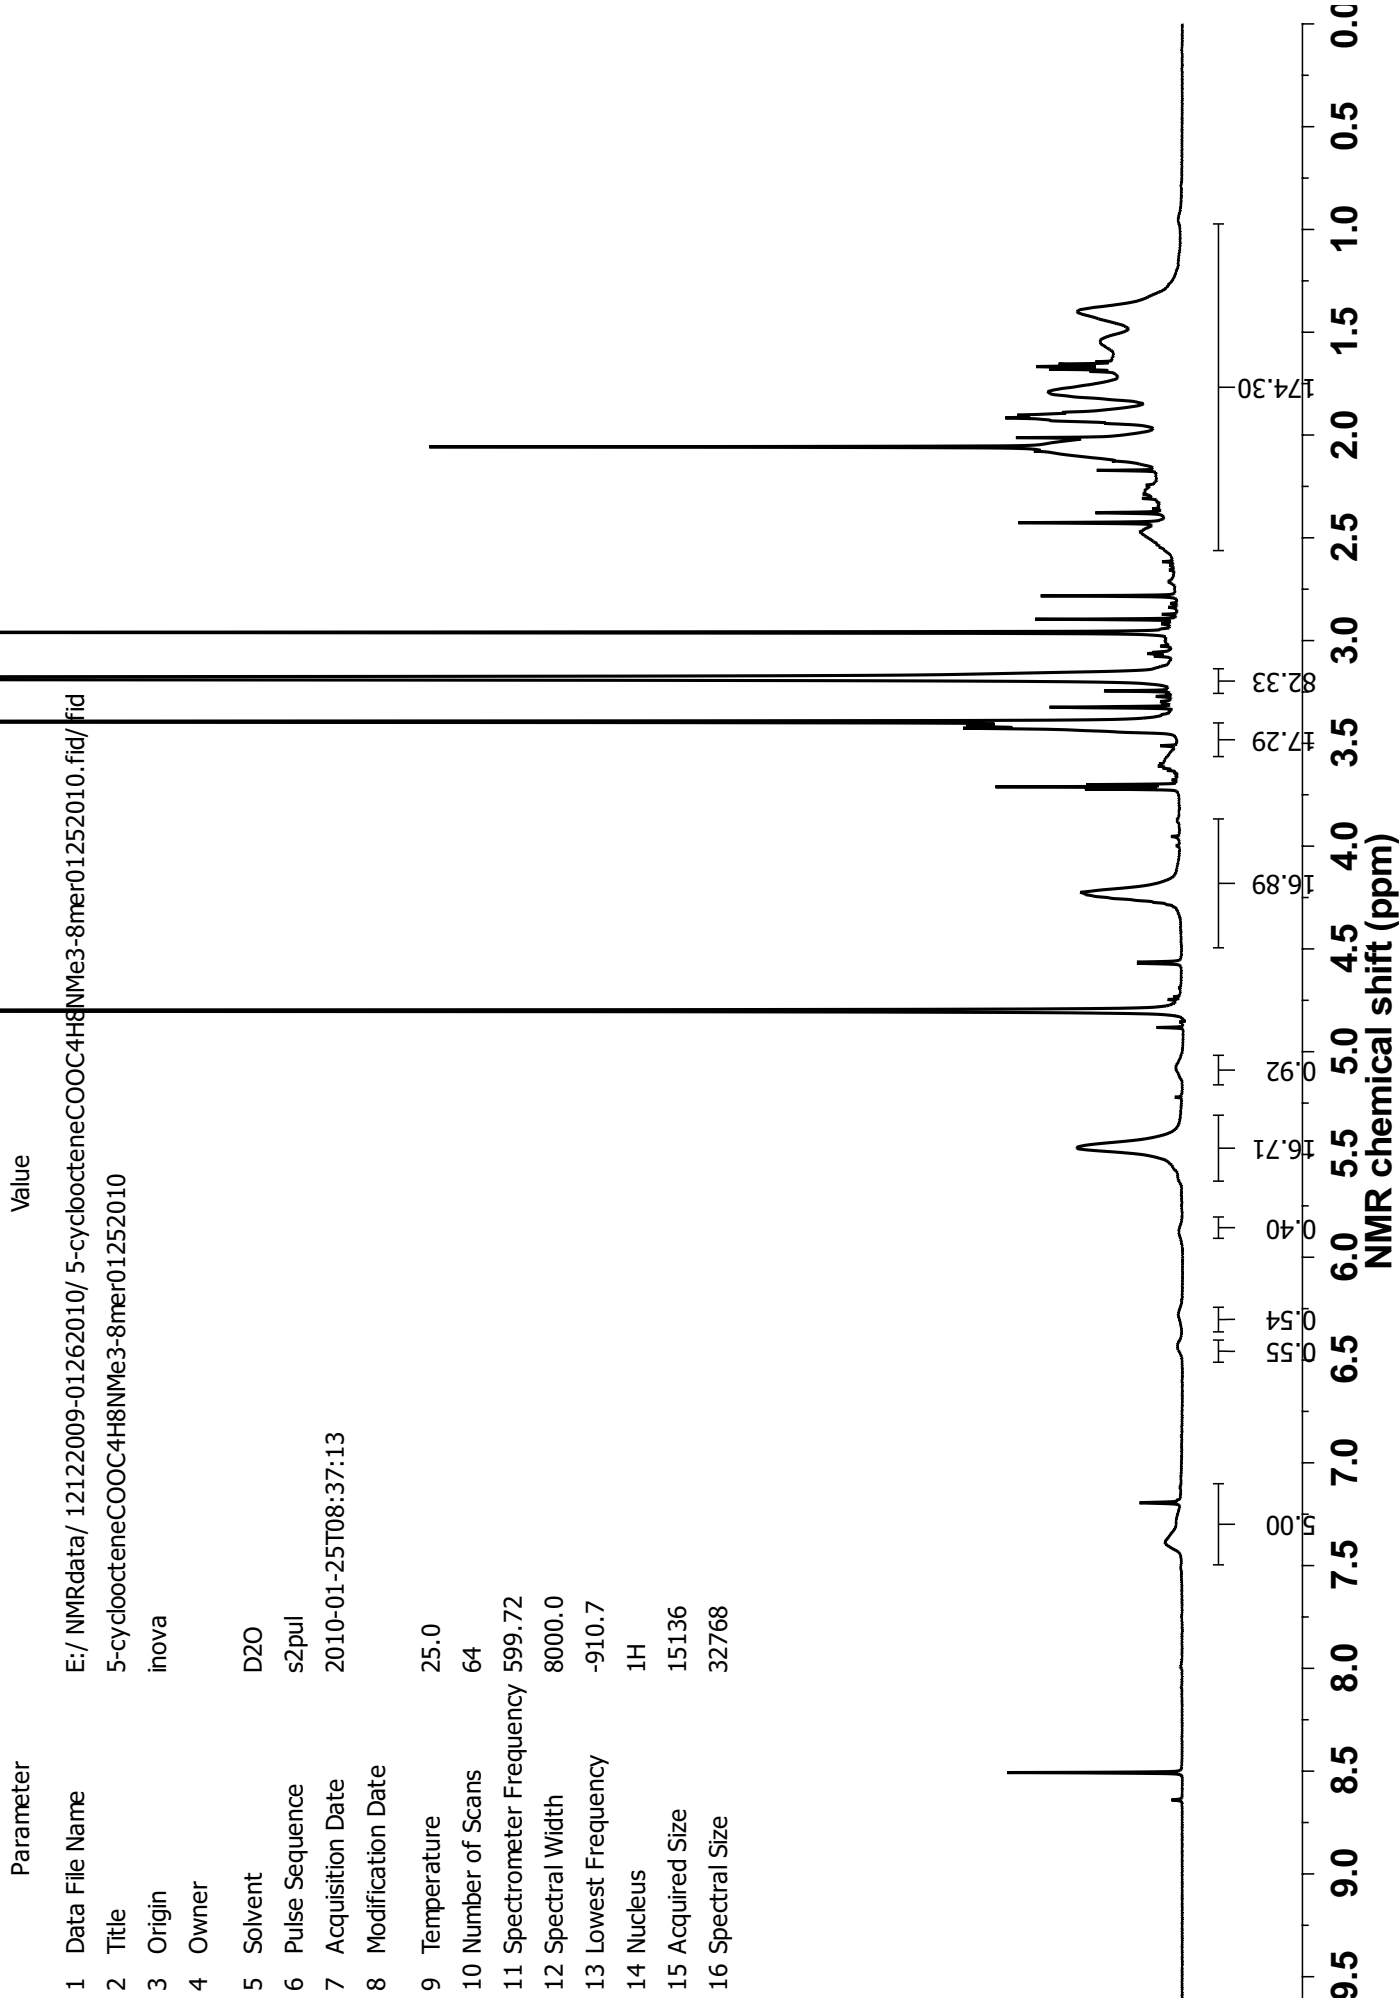

# <sup>1</sup>H-NMR spectrum of Homopolymer-14
